# Supplementary material for: Sandalwood Oils of Different Origins Are Active In Vitro against Madurella mycetomatis, the Major Fungal Pathogen Responsible for Eumycetoma
Source: MDPI journal article supplement (doi:10.3390/molecules29081846), 2024-04-18
Supplement: s1 [file s1]

Supplementary Materials

# Sandalwood oils of different origins are active in vitro against *Madurella mycetomatis*, the major fungal pathogen responsible for eumycetoma

Shereen O. Abd Algaffar<sup>1</sup>, Stephan Seegers<sup>2</sup>, Prabodh Satyal<sup>3</sup>, William N. Setzer<sup>4</sup>, Thomas J. Schmidt<sup>2,\*</sup> and Sami A. Khalid <sup>1,\*</sup>

<sup>1</sup> Faculty of Pharmacy, University of Science and Technology, Omdurman, Sudan; phd\_sh086@hotmail.com (S.O.A.A.); khalidseek@hotmail.com (S.A.K.)

<sup>2</sup> University of Münster, Institute of Pharmaceutical Biology and Phytochemistry (IPBP), PharmaCampus – Corrensstrasse 48, D-48149 Münster, Germany; s\_seeg03@uni-muenster.de (S.S.), thomschm@uni-muenster.de (T.J.S.)

<sup>3</sup> Essential Oil Science, dōTERRA International, 1248 W 700 S, Pleasant Grove, UT 84062, USA; psatyal@doterra.com (P.S.)

<sup>4</sup> Department of Chemistry, University of Alabama in Huntsville, Huntsville, AL 35899, USA; wsetzer@chemistry.uah.edu (W.N.S.)

\* Correspondence: thomschm@uni-muenster.de (T.J.S.); khalidseek@hotmail.com (S.A.K.)

**Table S1.** Complete list of constituents detected in the Sandalwood oils under study by GC-QTOF MS analysis using a DB-HeavyWax column.

| No. | Compound                         | LRI  | <i>S. album</i><br>EO-24 | <i>S. album</i><br>Ess-EO1 | <i>S. album</i> 19<br>doT-EO1 | <i>S. album</i> (ID)<br>doT-EO5 | <i>S. album</i> (ID)<br>doT-EO6 | <i>S. album</i> (IN)<br>doT-EO8 | <i>S. album</i> (AUS)<br>doT-EO11 | <i>S. paniculatum</i><br>Ess-EO5 | <i>S. paniculatum</i> 19<br>doT-EO2 | <i>S. paniculatum</i><br>doT-EO7 | <i>S. austrocaledonicum</i><br>doT-EO9 | <i>S. austrocaledonicum</i><br>doT-EO10 | <i>S. austrocaledonicum</i><br>Ess-EO4 | <i>Biotechn. synthetic</i><br>Isobionics | <i>S. spicatum</i><br>Ess-EO2 | <i>S. lanceolatum</i><br>Ess-EO3 | <i>A. balsamifera</i><br>Ess-EO6 | <i>B. huillensis</i><br>Ess-EO7 |
|-----|----------------------------------|------|--------------------------|----------------------------|-------------------------------|---------------------------------|---------------------------------|---------------------------------|-----------------------------------|----------------------------------|-------------------------------------|----------------------------------|----------------------------------------|-----------------------------------------|----------------------------------------|------------------------------------------|-------------------------------|----------------------------------|----------------------------------|---------------------------------|
| 1   | $\alpha$ -Copaene                | 1499 |                          |                            |                               |                                 |                                 |                                 |                                   |                                  |                                     |                                  |                                        |                                         |                                        |                                          |                               |                                  |                                  | 1,16                            |
| 2   | Ylangene                         | 1506 |                          |                            |                               |                                 |                                 |                                 |                                   |                                  |                                     |                                  |                                        |                                         |                                        |                                          |                               |                                  |                                  | 1,49                            |
| 3   | n.d.                             | 1522 |                          |                            |                               |                                 |                                 |                                 |                                   |                                  |                                     |                                  |                                        |                                         |                                        |                                          |                               |                                  |                                  | 0,04                            |
| 4   | n.d.                             | 1541 |                          |                            |                               |                                 |                                 |                                 |                                   |                                  |                                     |                                  |                                        |                                         |                                        |                                          |                               |                                  |                                  | 0,15                            |
| 5   | n.d.                             | 1545 |                          | 0,03                       | 0,04                          |                                 |                                 |                                 |                                   |                                  | 0,06                                |                                  |                                        | 0,05                                    |                                        |                                          |                               |                                  |                                  |                                 |
| 6   | n.d.                             | 1546 |                          |                            |                               |                                 |                                 |                                 |                                   |                                  |                                     |                                  |                                        |                                         |                                        |                                          |                               |                                  |                                  | 0,03                            |
| 7   | Sesquithujene                    | 1564 |                          |                            |                               |                                 |                                 |                                 |                                   | 0,03                             |                                     | 0,03                             |                                        |                                         |                                        |                                          | 0,07                          | 0,11                             |                                  |                                 |
| 8   | $\alpha$ -Cedrene                | 1581 |                          |                            |                               |                                 |                                 |                                 |                                   |                                  |                                     |                                  |                                        |                                         |                                        |                                          |                               | 0,45                             | 0,05                             |                                 |
| 9   | $\alpha$ -Santalene              | 1583 | 0,94                     | 1,06                       | 0,54                          | 0,47                            | 0,77                            | 0,51                            | 0,86                              | 1,00                             | 1,09                                | 0,70                             | 1,09                                   | 1,05                                    | 0,71                                   | 3,26                                     | 0,63                          |                                  |                                  |                                 |
| 10  | trans- $\alpha$ -<br>Bergamotene | 1594 | 0,15                     | 0,20                       | 0,10                          | 0,10                            | 0,14                            | 0,08                            | 0,14                              | 0,13                             | 0,15                                | 0,09                             | 0,15                                   | 0,14                                    | 0,09                                   | 0,84                                     | 0,19                          |                                  |                                  |                                 |
| 11  | n.d.                             | 1601 |                          |                            |                               |                                 |                                 |                                 |                                   |                                  |                                     |                                  |                                        |                                         |                                        |                                          |                               |                                  |                                  | 0,03                            |
| 12  | n.d.                             | 1609 |                          |                            |                               |                                 |                                 |                                 |                                   |                                  |                                     |                                  |                                        |                                         |                                        |                                          |                               |                                  |                                  | 0,06                            |
| 13  | n.d.                             | 1632 |                          |                            |                               |                                 |                                 |                                 |                                   |                                  |                                     |                                  |                                        |                                         |                                        |                                          |                               |                                  |                                  | 0,04                            |
| 14  | n.d.                             | 1639 |                          |                            |                               |                                 |                                 |                                 |                                   |                                  |                                     |                                  |                                        |                                         |                                        |                                          |                               |                                  |                                  | 0,10                            |
| 15  | epi- $\beta$ -Santalene          | 1641 | 0,99                     | 1,13                       | 0,73                          | 0,58                            | 0,82                            | 0,64                            | 1,02                              | 0,89                             | 0,90                                | 0,64                             | 0,87                                   | 0,81                                    | 0,55                                   | 0,19                                     | 0,35                          |                                  |                                  |                                 |
| 16  | n.d.                             | 1643 |                          |                            |                               |                                 |                                 |                                 |                                   |                                  |                                     |                                  |                                        |                                         |                                        |                                          |                               |                                  |                                  | 0,06                            |
| 17  | n.d.                             | 1646 |                          |                            |                               |                                 |                                 |                                 |                                   |                                  |                                     |                                  |                                        |                                         |                                        |                                          |                               |                                  |                                  | 0,12                            |
| 18  | $\beta$ -Santalene               | 1655 | 1,54                     | 1,88                       | 1,13                          | 0,95                            | 1,27                            | 0,99                            | 1,52                              | 1,22                             | 0,91                                | 0,83                             | 0,89                                   | 0,81                                    | 0,55                                   | 1,37                                     | 0,52                          |                                  |                                  |                                 |
| 19  | n.d.                             | 1656 |                          |                            |                               |                                 |                                 |                                 |                                   |                                  |                                     |                                  |                                        |                                         |                                        |                                          |                               |                                  |                                  | 0,10                            |
| 20  | Muurola-4,5-diene                | 1657 |                          |                            |                               |                                 |                                 |                                 |                                   |                                  |                                     |                                  |                                        |                                         |                                        |                                          |                               |                                  |                                  | 0,38                            |
| 21  | n.d.                             | 1659 |                          |                            |                               |                                 |                                 |                                 |                                   |                                  |                                     |                                  |                                        |                                         |                                        |                                          | 0,09                          |                                  |                                  |                                 |
| 22  | Isocadinene                      | 1665 |                          |                            |                               |                                 |                                 |                                 |                                   |                                  |                                     |                                  |                                        |                                         |                                        |                                          |                               |                                  |                                  | 0,17                            |
| 23  | $\alpha$ -Acoradiene             | 1665 |                          |                            |                               |                                 |                                 |                                 |                                   |                                  |                                     |                                  |                                        |                                         |                                        |                                          |                               |                                  |                                  | 0,90                            |
| 24  | (E)- $\beta$ -Farnesene          | 1670 |                          |                            |                               |                                 |                                 |                                 |                                   |                                  |                                     |                                  |                                        |                                         |                                        | 0,24                                     |                               |                                  |                                  |                                 |
| 25  | n.d.                             | 1676 |                          |                            |                               |                                 |                                 |                                 |                                   |                                  |                                     |                                  |                                        |                                         |                                        |                                          |                               |                                  |                                  | 0,08                            |
| 26  | Amorpha-4-11-<br>diene           | 1678 |                          |                            |                               |                                 |                                 |                                 |                                   |                                  |                                     |                                  |                                        |                                         |                                        |                                          |                               |                                  |                                  | 0,23                            |
| 27  | $\beta$ -Acoradiene              | 1679 |                          |                            |                               |                                 |                                 |                                 |                                   | 0,06                             |                                     | 0,04                             |                                        |                                         |                                        |                                          | 0,12                          | 0,36                             |                                  |                                 |
| 28  | n.d.                             | 1681 |                          |                            |                               |                                 |                                 |                                 |                                   |                                  |                                     |                                  |                                        |                                         |                                        |                                          |                               |                                  |                                  | 0,05                            |
| 29  | trans- $\beta$ -<br>Bergamotene  | 1690 |                          |                            |                               |                                 |                                 |                                 |                                   |                                  |                                     |                                  |                                        |                                         |                                        | 0,16                                     |                               |                                  |                                  |                                 |

|    |                                |      |      |      |      |      |      |      |      |      |      |      |      |      |      |      |      |      |       |      |      |      |      |      |
|----|--------------------------------|------|------|------|------|------|------|------|------|------|------|------|------|------|------|------|------|------|-------|------|------|------|------|------|
| 30 | n.d.                           | 1690 |      |      |      |      |      |      |      |      |      |      |      |      |      |      |      |      | 0,10  |      |      |      |      |      |
| 31 | $\alpha$ -Amorphene            | 1694 |      |      |      |      |      |      |      |      |      |      |      |      |      |      |      |      | 10,57 |      |      |      |      |      |
| 32 | $\gamma$ -Curcumene            | 1696 | 0,03 |      |      |      |      |      |      |      |      |      |      | 0,10 | 0,05 | 0,04 | 0,06 | 0,05 |       |      |      | 0,25 | 0,53 | 0,39 |
| 33 | $\gamma$ -Muurolene            | 1698 |      |      |      |      |      |      |      |      |      |      |      |      |      |      |      |      | 0,24  |      |      |      |      |      |
| 34 | cis-4,10-<br>Epoxyamorphane    | 1707 |      |      |      |      |      |      |      |      |      |      |      |      |      |      |      |      | 1,05  |      |      |      |      |      |
| 35 | n.d.                           | 1709 |      |      |      |      |      |      |      |      |      |      |      |      |      |      |      |      | 0,07  |      |      |      |      |      |
| 36 | n.d.                           | 1715 |      |      |      |      |      |      |      |      |      |      | 0,06 |      |      |      | 0,03 | 0,09 | 0,06  |      |      |      |      |      |
| 37 | n.d.                           | 1716 |      |      |      |      |      |      |      |      |      |      |      |      |      |      |      |      | 0,17  |      |      |      |      |      |
| 38 | $\gamma$ -Amorphene            | 1719 |      |      |      |      |      |      |      |      |      |      |      |      |      |      |      |      | 2,90  |      |      |      |      |      |
| 39 | $\alpha$ -Zingiberene          | 1724 |      |      |      |      |      |      |      |      |      |      |      |      |      |      |      |      | 0,86  |      |      |      |      |      |
| 40 | $\beta$ -<br>Dihydroagarofura  | 1726 |      |      |      |      |      |      |      |      |      |      |      |      |      |      |      |      | 0,44  |      |      |      |      |      |
| 41 | n                              | n.d. | 1727 |      |      |      |      |      |      |      |      |      |      |      |      |      |      |      |       | 0,10 |      |      |      |      |
| 42 | $\alpha$ -Muurolene            | 1727 |      |      |      |      |      |      |      |      |      |      |      |      |      |      |      |      | 0,79  |      |      |      |      |      |
| 43 | $\beta$ -Bisabolene            | 1730 | 0,06 | 0,05 | 0,05 | 0,06 | 0,07 | 0,08 | 0,05 | 0,21 | 0,29 | 0,08 | 0,24 | 0,34 | 0,24 | 0,09 | 0,19 | 1,85 | 0,70  |      |      |      |      |      |
| 44 | $\gamma$ -Bisabolene           | 1737 | 0,02 | 0,01 | 0,02 |      | 0,02 | 0,02 | 0,04 |      |      |      |      |      |      |      |      |      |       | 0,03 | 0,04 |      |      |      |
| 45 | $\beta$ -Curcumene             | 1743 | 0,08 | 0,11 | 0,07 | 0,07 | 0,05 | 0,07 | 0,02 | 0,21 | 0,12 | 0,07 | 0,16 | 0,13 | 0,10 | 0,41 |      |      | 0,78  |      |      |      |      |      |
| 46 | Sesquicineol                   | 1746 |      |      |      |      |      |      |      |      |      |      |      |      |      |      |      |      | 0,11  |      |      |      |      |      |
| 47 | $\delta$ -Cadinene             | 1759 |      |      |      |      |      |      |      |      |      |      |      |      |      |      |      |      | 3,42  |      |      |      |      |      |
| 48 | 7-epi- $\alpha$ -Selinene      | 1764 |      |      |      |      |      |      |      |      |      |      |      |      |      |      |      |      | 0,25  |      |      |      |      |      |
| 49 | Tricycloekasantala<br>I        | 1765 | 0,08 | 0,07 | 0,10 | 0,09 | 0,10 | 0,08 | 0,17 | 0,13 | 0,06 | 0,10 | 0,06 | 0,04 | 0,04 |      |      |      |       |      |      |      |      |      |
| 50 | $\beta$ -<br>Sesquiphellandren | 1771 |      |      |      |      |      |      |      |      |      |      |      |      |      |      |      |      | 0,06  | 0,11 | 1,18 |      |      |      |
| 51 | $\alpha$ -Curcumene            | 1777 | 0,35 | 0,33 | 0,35 | 0,24 | 0,31 | 0,27 | 0,43 | 0,33 | 0,36 | 0,31 | 0,33 | 0,34 | 0,26 | 0,50 |      |      | 0,76  | 2,05 |      |      |      |      |
| 52 | Selina-3-7-diene               | 1780 |      |      |      |      |      |      |      |      |      |      |      |      |      |      |      |      | 0,98  |      |      |      |      |      |
| 53 | n.d.                           | 1783 |      |      |      |      |      |      |      |      |      |      |      |      |      |      |      |      | 0,15  |      |      |      |      |      |
| 54 | n.d.                           | 1793 |      |      |      |      |      |      |      |      |      |      |      |      |      |      |      |      | 0,07  |      |      |      |      |      |
| 55 | n.d.                           | 1808 |      |      |      |      |      |      |      |      |      |      |      |      |      |      |      |      | 0,07  |      |      |      |      |      |
| 56 | n.d.                           | 1818 |      |      |      |      |      |      |      |      |      |      |      |      |      |      |      |      | 0,13  |      |      |      |      |      |
| 57 | cis-Calamenene                 | 1832 |      |      |      |      |      |      |      |      |      |      |      |      |      |      |      |      | 3,83  |      |      |      |      |      |
| 58 | n.d.                           | 1842 |      |      |      |      |      |      |      |      |      |      |      |      |      |      |      |      | 0,72  |      |      |      |      |      |
| 59 | n.d.                           | 1847 |      |      |      |      |      |      |      |      |      |      | 0,08 | 0,02 |      |      |      |      |       |      |      | 0,08 |      |      |
| 60 | n.d.                           | 1853 |      |      |      |      |      |      |      |      |      |      |      |      |      |      |      |      | 0,23  |      |      |      |      |      |
| 61 | n.d.                           | 1857 |      |      |      |      |      |      |      |      |      |      |      |      |      |      |      |      | 0,05  |      |      |      |      |      |
| 62 | 10,11-<br>Epoxycalamenene      | 1883 |      |      |      |      |      |      |      |      |      |      |      |      |      |      |      |      | 0,28  |      |      |      |      |      |
| 63 | $\alpha$ -Agarofuran           | 1885 |      |      |      |      |      |      |      |      |      |      |      |      |      |      |      |      | 0,49  |      |      |      |      |      |

|     |                                  |      |      |      |      |      |      |      |      |      |      |      |      |      |      |      |      |      |      |
|-----|----------------------------------|------|------|------|------|------|------|------|------|------|------|------|------|------|------|------|------|------|------|
| 64  | $\gamma$ -Dehydro-ar-Himachalene | 1900 |      |      |      |      |      |      |      |      |      |      |      |      |      |      |      |      | 0,65 |
| 65  | n.d.                             | 1900 |      |      |      |      |      |      |      |      |      |      |      |      |      |      | 0,17 | 0,06 |      |
| 66  | n.d.                             | 1909 |      |      |      | 0,02 |      |      |      | 0,03 |      |      |      |      |      |      |      | 0,54 |      |
| 67  | Spirojatamol                     | 1911 |      |      |      |      |      |      |      |      |      |      |      |      |      |      |      |      | 9,25 |
| 68  | $\alpha$ -Calacorene             | 1912 |      |      |      |      |      |      |      |      |      |      |      |      |      |      |      |      | 4,43 |
| 69  | n.d.                             | 1925 |      |      |      |      |      |      |      |      |      |      |      |      |      |      |      |      | 0,55 |
| 70  | Dendrolasin                      | 1939 |      |      |      |      |      |      |      | 0,03 | 0,05 | 0,06 |      |      |      | 1,60 | 0,68 |      |      |
| 71  | n.d.                             | 1948 |      |      |      |      |      |      |      |      |      |      |      |      |      |      |      | 0,43 |      |
| 72  | n.d.                             | 1951 | 0,03 |      | 0,03 |      |      |      | 0,05 |      |      |      |      |      |      |      |      |      |      |
| 73  | $\beta$ -Calacorene              | 1953 |      |      |      |      |      |      |      |      |      |      |      |      |      |      |      |      | 0,28 |
| 74  | n.d.                             | 1954 |      |      |      |      |      |      |      |      |      |      |      |      |      |      |      | 0,16 |      |
| 75  | n.d.                             | 1957 |      |      |      |      |      |      |      |      |      |      |      |      |      | 0,06 |      |      |      |
| 76  | n.d.                             | 1964 |      |      |      | 0,03 |      |      | 0,05 | 0,03 |      |      |      |      |      | 0,17 | 0,32 |      |      |
| 77  | Caryophyllene-oxide              | 1965 |      |      |      |      |      |      |      |      |      |      |      |      |      |      |      |      | 0,30 |
| 78  | n.d.                             | 1968 |      |      |      |      |      |      |      |      |      |      |      |      |      |      |      |      | 0,33 |
| 79  | n.d.                             | 1979 |      |      |      |      |      |      |      |      |      |      |      |      |      |      |      |      | 0,14 |
| 80  | n.d.                             | 1980 |      |      |      | 0,02 |      |      | 0,06 | 0,05 |      |      |      |      |      | 0,06 | 0,10 |      |      |
| 81  | n.d.                             | 1986 |      |      |      |      |      |      |      |      |      |      |      |      |      |      |      |      | 0,11 |
| 82  | n.d.                             | 1991 | 0,03 | 0,07 |      | 0,06 |      |      |      |      |      |      |      |      |      |      |      |      |      |
| 83  | n.d.                             | 1992 |      |      |      |      |      |      |      |      |      |      |      |      |      |      |      |      | 0,68 |
| 84  | n.d.                             | 1997 |      |      |      |      |      |      |      |      |      |      |      |      |      |      |      |      | 0,29 |
| 85  | $\alpha$ -Photosantalol          | 2008 | 0,31 | 0,38 | 0,09 | 0,21 | 0,35 | 0,13 | 0,10 | 0,25 | 0,05 | 0,10 | 0,04 | 0,03 |      |      |      |      |      |
| 86  | n.d.                             | 2008 |      |      |      |      |      |      |      |      |      |      |      |      |      |      |      |      | 0,15 |
| 87  | n.d.                             | 2011 |      |      |      |      |      |      |      |      |      |      |      |      |      |      |      |      | 0,27 |
| 88  | n.d.                             | 2012 |      |      |      |      |      |      |      |      |      |      |      |      |      | 0,12 | 0,17 |      |      |
| 89  | n.d.                             | 2018 |      |      |      |      |      |      |      |      |      |      |      |      |      |      |      |      | 0,13 |
| 90  | Gleenol                          | 2032 |      |      |      |      |      |      |      |      |      |      |      |      |      |      |      |      | 0,67 |
| 91  | n.d.                             | 2034 |      |      |      |      |      |      |      | 0,27 | 0,04 | 0,18 | 0,05 | 0,03 |      |      |      |      |      |
| 92  | (E)-Nerolidol                    | 2044 | 0,02 | 0,02 | 0,03 | 0,02 | 0,04 | 0,03 | 0,05 | 0,10 | 0,13 | 0,11 | 0,14 | 0,13 | 0,16 | 2,72 | 1,00 | 0,70 |      |
| 93  | n.d.                             | 2044 |      |      |      |      |      |      |      |      |      |      |      |      |      |      |      |      | 0,09 |
| 94  | Cubenol                          | 2050 |      |      |      |      |      |      |      |      |      |      |      |      |      |      |      |      | 0,55 |
| 95  | n.d.                             | 2050 |      |      |      |      |      |      |      |      |      |      |      |      |      |      |      | 0,13 |      |
| 96  | $\alpha$ -Corocalene             | 2054 |      |      |      |      |      |      |      |      |      |      |      |      |      |      |      |      | 0,62 |
| 97  | Tricycloekasantalo<br>l          | 2055 | 0,13 | 0,08 | 0,15 | 0,12 | 0,17 | 0,07 | 0,25 | 0,06 | 0,08 | 0,09 | 0,08 | 0,07 | 0,04 |      |      |      |      |
| 98  | Epicubenol                       | 2056 |      |      |      |      |      |      |      |      |      |      |      |      |      |      |      |      | 1,96 |
| 99  | $\beta$ -Oplopenone              | 2059 |      |      |      |      |      |      |      |      |      |      |      |      |      |      |      |      | 2,90 |
| 100 | n.d.                             | 2062 |      |      |      |      |      |      |      |      |      |      |      |      |      | 0,06 |      |      |      |

|     |                                                           |      |      |      |      |      |      |      |      |      |      |      |      |      |      |      |      |      |      |      |      |      |
|-----|-----------------------------------------------------------|------|------|------|------|------|------|------|------|------|------|------|------|------|------|------|------|------|------|------|------|------|
| 101 | Acetyldihydroalbe-<br>ne                                  | 2062 | 0,41 |      |      |      |      |      |      |      |      |      |      |      |      |      |      | 0,20 | 0,23 | 0,13 | 0,15 | 0,12 |
| 102 | 5-(2,3-Dimethyltri-<br>cyclo-heptan-3-<br>yl)pentan-2-one | 2063 | 0,37 | 0,39 | 0,22 | 0,24 | 0,39 | 0,26 |      |      |      |      | 0,22 |      |      |      |      |      |      |      |      |      |
| 103 | n.d.                                                      | 2066 |      |      |      |      |      |      |      |      |      |      |      |      |      |      |      | 0,21 |      |      |      |      |
| 104 | n.d.                                                      | 2068 |      |      |      |      |      |      |      |      |      |      |      |      |      |      |      | 0,16 |      |      |      |      |
| 105 | n.d.                                                      | 2069 |      |      |      |      |      |      |      |      |      |      |      |      |      |      |      | 0,08 |      |      |      |      |
| 106 | n.d.                                                      | 2074 |      |      |      |      |      |      |      |      |      |      |      |      |      |      |      | 0,38 |      |      |      |      |
| 107 | $\alpha$ -Elemol                                          | 2076 |      |      |      |      |      |      |      |      |      |      |      |      |      |      |      | 9,02 |      |      |      |      |
| 108 | n.d.                                                      | 2080 | 0,18 | 0,22 | 0,06 | 0,11 | 0,20 | 0,10 | 0,06 | 0,12 | 0,04 | 0,06 |      |      |      |      |      |      |      |      |      |      |
| 109 | Guaiol                                                    | 2083 |      |      |      |      |      |      |      |      |      |      |      |      |      |      |      | 0,36 |      |      |      |      |
| 110 | n.d.                                                      | 2092 |      |      |      |      |      |      |      |      |      |      |      |      |      |      |      | 0,30 |      |      |      |      |
| 111 | n.d.                                                      | 2094 |      |      |      |      |      |      |      |      |      |      |      |      |      |      |      | 0,16 |      |      |      |      |
| 112 | 10-epi- $\gamma$ -Eudesmol                                | 2094 |      |      |      |      |      |      |      |      |      |      |      |      |      |      |      | 6,67 |      |      |      |      |
| 113 | n.d.                                                      | 2098 |      |      |      |      |      |      |      |      |      |      |      |      |      |      |      | 0,38 |      |      |      |      |
| 114 | n.d.                                                      | 2102 | 0,04 |      |      |      |      | 0,05 |      |      |      |      | 0,07 | 0,09 | 0,06 | 0,06 | 0,10 | 0,08 |      |      |      |      |
| 115 | n.d.                                                      | 2105 |      |      |      |      |      |      |      |      |      |      |      |      |      |      |      | 0,09 |      |      |      |      |
| 116 | Zingiberenol                                              | 2109 |      |      |      |      |      |      |      |      |      |      |      |      |      |      |      | 0,09 |      |      |      |      |
| 117 | n.d.                                                      | 2119 |      |      |      |      |      |      |      |      |      |      |      |      |      |      |      | 0,15 |      |      |      |      |
| 118 | n.d.                                                      | 2119 |      |      |      |      |      |      |      |      |      |      |      |      |      |      |      | 0,12 |      |      |      |      |
| 119 | n.d.                                                      | 2123 | 0,24 |      |      |      |      |      |      |      |      |      |      |      |      |      |      | 0,08 |      |      |      |      |
| 120 | n.d.                                                      | 2124 |      |      |      |      |      |      |      |      |      |      |      |      |      |      |      | 2,01 |      |      |      |      |
| 121 | Cyclosantalal                                             | 2126 | 0,20 | 0,18 | 0,65 | 0,37 | 0,28 | 1,11 | 0,33 | 1,37 | 1,59 | 1,31 | 1,65 | 1,06 | 0,49 |      |      |      |      |      |      |      |
| 122 | $\alpha$ -Acorenol                                        | 2126 |      |      |      |      |      |      |      |      |      |      |      |      |      |      |      | 0,50 | 0,27 |      |      |      |
| 123 | n.d.                                                      | 2129 |      |      |      |      |      |      |      |      |      |      |      |      |      |      |      | 0,05 |      |      |      |      |
| 124 | n.d.                                                      | 2134 |      |      |      |      |      |      |      |      |      |      |      |      |      |      |      |      |      |      |      |      |
| 125 | epi-Cyclosantalal                                         | 2134 | 0,06 | 0,10 | 0,16 | 0,08 | 0,07 | 0,33 | 0,05 | 0,27 | 0,32 | 0,22 | 0,32 | 0,19 | 0,14 |      |      |      |      |      |      |      |
| 126 | n.d.                                                      | 2136 |      |      |      |      |      |      |      |      |      |      |      |      |      |      |      | 2,20 |      |      |      |      |
| 127 | n.d.                                                      | 2136 |      |      |      |      |      |      |      |      |      |      |      |      |      |      |      | 0,40 |      |      |      |      |
| 128 | n.d.                                                      | 2139 |      |      |      |      |      |      |      |      |      |      |      |      |      |      |      | 0,59 |      |      |      |      |
| 129 | n.d.                                                      | 2141 |      |      |      |      |      |      |      |      |      |      |      |      |      |      |      | 0,12 |      |      |      |      |
| 130 | Ylangenal                                                 | 2146 |      |      |      |      |      |      |      |      |      |      |      |      |      |      |      | 7,98 |      |      |      |      |
| 131 | $\beta$ -Bisabolol                                        | 2148 | 0,41 | 0,40 | 0,51 | 0,46 | 0,42 | 0,40 | 0,42 | 0,74 | 0,55 | 0,73 | 0,53 | 0,50 | 0,48 | 2,10 | 1,99 |      |      |      |      |      |
| 132 | n.d.                                                      | 2149 |      |      |      |      |      |      |      |      |      |      |      |      |      |      |      | 0,07 |      |      |      |      |
| 133 | n.d.                                                      | 2154 |      |      |      |      |      |      |      |      |      |      |      |      |      |      |      | 0,88 |      |      |      |      |
| 134 | n.d.                                                      | 2154 |      |      |      |      |      |      |      |      |      |      |      |      |      |      |      | 0,22 |      |      |      |      |
| 135 | (E)- $\alpha$ -Santalal                                   | 2156 | 1,95 | 1,44 | 2,37 | 1,53 | 1,44 | 2,94 | 2,53 | 3,03 | 1,72 | 2,99 | 1,40 | 1,18 | 0,85 | 0,21 | 0,43 |      |      |      |      |      |
| 136 | $\gamma$ -Eudesmol                                        | 2160 |      |      |      |      |      |      |      |      |      |      |      |      |      |      |      | 10,5 |      |      |      |      |
| 137 | n.d.                                                      | 2161 |      |      |      |      |      |      |      |      |      |      |      |      |      |      |      | 8    |      |      |      |      |
| 137 | n.d.                                                      | 2161 |      |      |      |      |      |      |      |      |      |      |      |      |      |      |      | 0,93 |      |      |      |      |

|     |                          |      |      |      |      |      |      |      |      |      |      |      |      |      |      |      |           |
|-----|--------------------------|------|------|------|------|------|------|------|------|------|------|------|------|------|------|------|-----------|
| 138 | n.d.                     | 2162 |      |      |      |      |      |      |      |      |      |      |      |      |      |      | 0,42      |
| 139 | n.d.                     | 2164 | 0,12 | 0,32 | 0,15 | 0,23 | 0,29 | 0,24 | 0,16 | 0,28 | 0,11 | 0,44 | 0,19 | 0,16 | 0,09 | 0,26 | 0,22      |
| 140 | Copaborneol              | 2168 |      |      |      |      |      |      |      |      |      |      |      |      |      |      | 2,81      |
| 141 | n.d.                     | 2168 |      |      |      |      |      |      |      |      |      |      |      |      |      |      | 0,53      |
| 142 | n.d.                     | 2169 |      | 0,09 |      | 0,10 |      |      |      |      |      |      |      |      |      | 0,19 |           |
| 143 | n.d.                     | 2173 | 0,12 |      | 0,62 | 0,22 | 0,14 | 0,45 | 1,11 |      | 0,36 | 0,30 | 0,25 | 0,39 | 0,33 | 0,20 |           |
| 144 | n.d.                     | 2174 | 0,27 | 0,41 |      | 0,34 | 0,31 | 0,12 |      | 0,41 |      | 0,10 |      |      |      |      |           |
| 145 | n.d.                     | 2176 |      |      |      |      |      |      |      |      |      |      |      |      |      |      |           |
| 146 | $\tau$ -Cadinol          | 2177 |      |      |      |      |      |      |      |      |      |      |      |      |      | 0,52 | 0,70      |
| 147 | n.d.                     | 2186 | 0,07 | 0,04 | 0,06 | 0,06 | 0,05 | 0,08 | 0,14 | 0,16 | 0,13 | 0,25 | 0,09 | 0,09 | 0,08 | 0,26 | 0,49      |
| 148 | $\alpha$ -Muurolol       | 2188 |      |      |      |      |      |      |      |      |      |      |      |      |      |      | 2,13      |
| 149 | n.d.                     | 2190 |      |      |      |      |      |      |      |      |      |      |      |      | 0,12 |      |           |
| 150 | n.d.                     | 2190 |      |      |      |      |      |      |      |      |      |      |      |      |      |      | 0,68      |
| 151 | n.d.                     | 2194 |      |      |      |      |      |      |      |      |      |      |      |      |      |      | 0,15      |
| 152 | n.d.                     | 2196 | 0,07 | 0,04 | 0,18 | 0,03 |      | 0,10 | 0,28 | 0,05 | 0,20 | 0,17 | 0,12 | 0,15 | 0,09 |      |           |
| 153 | n.d.                     | 2200 |      |      |      |      |      |      |      |      |      |      |      |      |      |      | 0,98      |
| 154 | Bulnesol                 | 2201 |      |      |      |      |      |      |      |      |      |      |      |      |      | 0,64 |           |
| 155 | Valerianol               | 2203 |      |      |      |      |      |      |      |      |      |      |      |      |      |      | 21,3<br>8 |
| 156 | Cadalene                 | 2207 |      |      |      |      |      |      |      |      |      |      |      |      |      |      | 3,85      |
| 157 | 7-epi-alpha-Eudesmol     | 2208 |      |      |      |      |      |      |      |      |      |      |      |      |      |      | 6,86      |
| 158 | $\alpha$ -Bisabolol      | 2212 | 0,06 | 0,06 | 0,10 | 0,20 | 0,12 | 0,14 | 0,10 | 0,28 | 0,31 | 0,19 | 0,38 | 0,53 | 0,58 | 7,45 | 2,74      |
| 159 | n.d.                     | 2214 |      |      |      |      |      |      |      |      |      |      |      |      |      |      | 7,18      |
| 160 | $\beta$ -Eudesmol        | 2215 |      |      |      |      |      |      |      |      |      |      |      |      |      |      | 11,4<br>9 |
| 161 | n.d.                     | 2216 |      |      |      |      |      |      |      |      |      |      |      |      |      |      | 0,33      |
| 162 | 8,14-Cedranediol         | 2219 |      |      |      |      |      |      |      |      |      |      |      |      |      | 0,18 | 0,42      |
| 163 | $\alpha$ -Cadinol        | 2220 |      |      |      |      |      |      |      |      |      |      |      |      |      |      | 1,05      |
| 164 | n.d.                     | 2222 | 0,17 | 0,14 | 0,20 | 0,15 | 0,13 | 0,19 | 0,25 | 0,27 | 0,13 | 0,36 | 0,05 | 0,26 | 0,03 | 0,09 |           |
| 165 | n.d.                     | 2228 |      |      |      |      |      |      |      |      |      |      |      |      |      |      | 0,32      |
| 166 | n.d.                     | 2232 |      |      |      |      |      |      |      |      |      |      |      |      |      |      | 0,18      |
| 167 | n.d.                     | 2235 |      |      |      |      |      |      |      |      |      |      |      |      |      | 0,17 |           |
| 168 | (Z)- $\beta$ -Santalal   | 2238 | 0,55 | 0,45 | 0,53 | 0,38 | 0,52 | 0,44 | 0,81 | 0,26 | 0,12 | 0,22 | 0,08 | 0,10 | 0,10 | 0,13 | 0,15      |
| 169 | n.d.                     | 2238 |      |      |      |      |      |      |      |      |      |      |      |      |      |      | 0,20      |
| 170 | n.d.                     | 2242 |      |      |      |      |      |      |      |      |      |      |      |      |      |      | 0,23      |
| 171 | n.d.                     | 2246 |      |      |      |      |      |      |      |      |      |      |      |      | 0,90 |      |           |
| 172 | n.d.                     | 2248 |      |      |      |      |      |      |      |      |      |      |      |      |      |      | 0,08      |
| 173 | (E)- $\beta$ -Santalal   | 2249 | 0,12 | 0,05 | 0,28 | 0,10 | 0,09 | 0,22 | 0,48 | 0,19 | 0,16 | 0,23 | 0,11 | 0,13 | 0,10 | 0,10 |           |
| 174 | n.d.                     | 2249 |      |      |      |      |      |      |      |      |      |      |      |      |      |      | 0,18      |
| 175 | $\alpha$ -Teresantalacid | 2255 | 0,48 | 0,50 | 0,60 | 0,45 | 0,49 | 0,47 | 0,52 | 0,57 | 0,42 | 0,40 | 0,42 | 0,46 | 0,43 | 0,43 |           |

|     |                                  |      |           |           |           |           |           |           |           |           |           |           |           |           |           |           |           |       |      |      |
|-----|----------------------------------|------|-----------|-----------|-----------|-----------|-----------|-----------|-----------|-----------|-----------|-----------|-----------|-----------|-----------|-----------|-----------|-------|------|------|
| 176 | n.d.                             | 2255 |           |           |           |           |           |           |           |           |           |           |           |           |           |           |           | 0,07  |      |      |
| 177 | n.d.                             | 2259 |           |           |           |           |           |           |           |           |           |           |           |           |           |           |           | 0,40  |      |      |
| 178 | n.d.                             | 2264 |           |           |           |           |           |           |           |           |           |           |           |           |           |           |           | 0,08  |      |      |
| 179 | n.d.                             | 2268 |           |           |           |           |           |           |           |           |           |           |           |           |           |           |           | 0,43  |      |      |
| 180 | n.d.                             | 2271 |           |           |           |           |           |           |           |           |           |           |           |           |           |           |           | 0,10  |      |      |
| 181 | Campherenol                      | 2273 | 0,49      | 0,54      | 0,73      | 0,37      | 0,55      | 0,53      | 0,43      | 0,49      | 0,32      | 0,49      | 0,30      | 0,31      | 0,27      | 0,44      |           |       |      |      |
| 182 | Bisabolone**                     | 2274 |           |           |           |           |           |           |           |           |           |           |           |           |           |           |           | 0,60  |      |      |
| 183 | n.d.                             | 2282 |           |           |           |           |           |           |           |           |           |           |           |           |           |           |           | 0,11  |      |      |
| 184 | Ylangenol                        | 2287 |           |           |           |           |           |           |           |           |           |           |           |           |           |           |           | 11,56 |      |      |
| 185 | Bisabolone**                     | 2288 |           |           |           |           |           |           |           |           |           |           |           |           |           |           |           | 0,68  |      |      |
| 186 | n.d.                             | 2290 |           |           |           |           |           |           |           |           |           |           |           |           |           |           |           | 1,41  |      |      |
| 187 | n.d.                             | 2297 |           |           |           |           |           |           |           |           |           |           |           |           |           |           |           | 0,26  |      |      |
| 188 | n.d.                             | 2297 |           |           | 0,07      | 0,07      |           |           | 0,09      | 0,11      | 0,29      | 0,18      | 0,27      | 0,19      | 0,15      | 0,07      | 0,46      | 1,00  |      |      |
| 189 | n.d.                             | 2298 |           |           |           |           |           |           |           |           |           |           |           |           |           | 0,06      |           |       |      |      |
| 190 | n.d.                             | 2303 |           |           |           |           |           |           |           |           |           |           |           |           |           |           |           | 0,31  |      |      |
| 191 | n.d.                             | 2303 |           |           | 0,14      |           |           |           |           |           |           |           |           |           |           |           |           |       |      |      |
| 192 | n.d.                             | 2305 |           |           |           |           |           |           |           |           |           |           |           |           |           |           |           | 0,17  |      |      |
| 193 | n.d.                             | 2311 | 0,02      |           | 0,02      |           |           |           |           |           | 0,06      | 0,10      | 0,05      | 0,04      | 0,19      | 0,21      | 0,18      | 0,83  |      |      |
| 194 | n.d.                             | 2314 |           |           |           |           |           |           |           |           |           |           |           |           |           |           |           | 0,40  |      |      |
| 195 | n.d.                             | 2316 |           |           |           |           |           |           |           |           |           |           |           |           |           |           |           | 0,20  |      |      |
| 196 | n.d.                             | 2323 |           |           |           |           |           |           |           |           |           |           |           |           |           |           |           | 0,11  |      |      |
| 197 | n.d.                             | 2326 | 0,03      | 0,02      | 0,18      | 0,15      | 0,06      | 0,21      | 0,17      | 0,35      | 0,43      | 0,47      | 0,37      | 0,27      | 0,15      | 0,71      |           | 0,99  |      |      |
| 198 | n.d.                             | 2329 |           |           |           |           |           |           |           |           |           |           |           |           |           | 0,33      |           | 0,75  |      |      |
| 199 | Humulane-1,6-dien-3-ol           | 2330 |           |           |           |           |           |           |           |           |           |           |           |           |           |           |           | 0,76  |      |      |
| 200 | (Z)- $\alpha$ -Santalol          | 2339 | 49,3<br>9 | 48,2<br>3 | 49,2<br>7 | 46,3<br>3 | 48,4<br>6 | 50,6<br>5 | 48,2<br>4 | 42,3<br>6 | 47,0<br>0 | 45,8<br>7 | 47,4<br>7 | 46,1<br>4 | 45,3<br>6 | 31,9<br>0 | 21,1<br>3 | 0,39  |      |      |
| 201 | n.d.                             | 2345 |           |           | 0,06      |           |           |           |           |           | 0,14      |           |           |           |           |           | 0,66      |       |      |      |
| 202 | (Z)-trans- $\alpha$ -Bergamotol  | 2350 | 5,76      | 6,75      | 4,35      | 7,06      | 6,74      | 4,61      | 4,11      | 4,49      | 5,03      | 3,43      | 5,37      | 5,66      | 5,86      | 2,32      | 3,46      |       |      |      |
| 203 | (2E,6E)-Farnesol                 | 2351 |           |           |           |           |           |           |           |           | t         | t         | t         | t         | t         | 0,42      | 10,1<br>5 | 3,35  | 0,30 |      |
| 204 | 4-Isopropyl-6-methyl-1-tetralone | 2353 |           |           |           |           |           |           |           |           |           |           |           |           |           |           |           | 1,35  |      |      |
| 205 | n.d.                             | 2355 |           |           |           |           |           |           |           |           |           |           | 0,10      |           |           |           |           |       | 0,15 | 0,57 |
| 206 | n.d.                             | 2357 |           |           |           |           |           |           |           |           |           |           |           |           |           |           |           | 0,74  |      |      |
| 207 | n.d.                             | 2363 |           |           |           |           |           |           |           |           |           |           |           |           |           | 0,54      |           | 1,20  |      |      |
| 208 | n.d.                             | 2365 | 0,13      | 0,08      | 0,21      | 0,25      | 0,10      | 0,17      | 0,17      | 0,33      | 0,38      | 0,51      | 0,19      | 0,29      | 0,06      | 1,85      |           | 1,78  |      |      |
| 209 | n.d.                             | 2365 |           |           |           |           |           |           |           |           |           |           |           |           |           | 0,43      |           |       |      |      |
| 210 | n.d.                             | 2366 |           |           |           |           |           |           |           |           |           |           |           |           |           |           |           | 0,21  |      |      |
| 211 | 8-Cedrene-13-ol                  | 2371 |           |           |           |           | 0,10      |           |           |           | 0,22      | 0,05      | 0,22      | 0,05      | 0,03      | 0,04      | 0,32      |       | 0,65 |      |





|     |                             |      |      |      |      |      |      |      |      |      |      |      |      |      |      |      |      |      |      |      |      |      |      |      |  |      |  |  |  |
|-----|-----------------------------|------|------|------|------|------|------|------|------|------|------|------|------|------|------|------|------|------|------|------|------|------|------|------|--|------|--|--|--|
| 245 | n.d.                        | 2583 | 0,02 |      |      |      |      |      |      |      |      |      | 0,04 |      |      |      |      |      |      |      |      |      |      |      |  |      |  |  |  |
| 246 | n.d.                        | 2593 |      |      |      |      |      |      |      |      |      |      | 0,25 |      |      |      |      |      |      |      |      |      |      |      |  |      |  |  |  |
| 247 | n.d.                        | 2610 | 0,16 |      | 0,10 |      | 0,16 |      | 0,09 |      | 0,13 |      |      |      |      |      |      |      |      |      |      |      |      |      |  |      |  |  |  |
| 248 | n.d.                        | 2613 |      |      |      |      |      |      |      |      |      |      | 0,09 |      |      |      |      |      |      |      |      |      |      |      |  |      |  |  |  |
| 249 | n.d.                        | 2621 |      |      |      |      |      |      |      |      |      |      | 0,24 |      |      |      |      |      |      |      |      |      |      |      |  |      |  |  |  |
| 250 | 8-Ketoylangenal             | 2630 |      |      |      |      |      |      |      |      |      |      | 1,71 |      |      |      |      |      |      |      |      |      |      |      |  |      |  |  |  |
| 251 | 8-Ketocopaenal              | 2657 |      |      |      |      |      |      |      |      |      |      | 1,31 |      |      |      |      |      |      |      |      |      |      |      |  |      |  |  |  |
| 252 | n.d.                        | 2667 |      |      |      |      |      |      |      |      |      |      | 0,27 |      |      |      |      |      |      |      |      |      |      |      |  |      |  |  |  |
| 253 | $\alpha$ -Teresantalic acid | 2675 | 0,29 | 0,33 | 0,22 |      | 0,31 |      | 0,16 |      | 0,09 |      |      |      |      |      |      |      |      |      |      |      |      |      |  |      |  |  |  |
| 254 | n.d.                        | 2693 |      |      |      |      |      |      |      |      |      |      | 0,07 |      |      |      |      |      |      |      |      |      |      |      |  |      |  |  |  |
| 255 | n.d.                        | 2698 |      |      |      |      |      |      |      |      |      |      | 0,12 |      |      |      |      |      |      |      |      |      |      |      |  |      |  |  |  |
| 256 | n.d.                        | 2703 |      |      |      |      |      |      |      |      |      |      | 0,15 |      |      |      |      |      |      |      |      |      |      |      |  |      |  |  |  |
| 257 | n.d.                        | 2706 |      |      |      |      |      |      |      |      |      |      | 0,06 |      |      |      |      |      |      |      |      |      |      |      |  |      |  |  |  |
| 258 | n.d.                        | 2709 | 0,03 |      |      |      |      |      |      |      |      |      | 0,01 |      |      |      |      |      |      |      |      |      | 0,03 |      |  |      |  |  |  |
| 259 | n.d.                        | 2762 |      |      |      |      |      |      |      |      |      |      | 0,10 |      |      |      |      |      |      |      |      |      |      |      |  |      |  |  |  |
| 260 | n.d.                        | 2798 |      |      |      |      |      |      |      |      |      |      | 0,39 |      |      |      |      |      |      |      |      |      |      |      |  |      |  |  |  |
| 261 | n.d.                        | 2824 |      |      |      |      |      |      |      |      |      |      | 0,21 |      |      |      |      |      |      |      |      |      |      |      |  |      |  |  |  |
| 262 | n.d.                        | 2828 |      |      |      |      |      |      |      |      |      |      | 0,18 |      |      |      |      |      |      |      |      |      |      |      |  |      |  |  |  |
| 263 | n.d.                        | 2880 |      |      |      |      |      |      |      |      |      |      | 0,10 |      |      |      |      |      |      |      |      |      |      |      |  |      |  |  |  |
| 264 | n.d.                        | 2891 |      |      |      |      |      |      |      |      |      |      | 0,11 |      | 0,08 |      |      |      |      |      |      |      |      |      |  |      |  |  |  |
| 265 | n.d.                        | 2911 |      |      |      |      |      |      |      |      |      |      | 0,08 |      | 0,43 |      | 0,15 |      | 0,19 |      | 0,29 |      |      |      |  |      |  |  |  |
| 266 | n-<br>Hexadecanoicacid      | 2938 | 0,95 | 0,76 | 1,09 | 0,42 | 0,91 | 0,81 | 0,93 | 0,74 | 1,24 | 0,63 | 0,97 | 0,80 | 0,57 | 1,36 | 1,05 | 1,08 | 0,59 | 0,96 |      |      |      |      |  |      |  |  |  |
| 267 | n.d.                        | 2983 | 0,48 |      |      |      |      |      |      |      |      |      |      |      |      |      |      |      |      |      |      |      |      |      |  |      |  |  |  |
| 268 | n.d.                        | 3008 | 0,17 |      | 0,29 |      | 0,75 |      |      |      |      | 0,32 |      |      |      |      |      |      |      |      |      |      |      |      |  |      |  |  |  |
| 269 | n.d.                        | 3116 |      |      | 0,73 |      |      |      |      |      |      |      |      |      |      |      |      |      |      |      |      |      |      |      |  |      |  |  |  |
| 270 | n-<br>Octadecanoicacid      | 3152 | 0,72 | 1,11 |      | 0,21 |      | 0,52 |      | 0,50 |      | 0,50 |      | 0,49 |      | 0,37 |      | 0,38 |      | 0,48 |      | 0,62 |      | 0,77 |  | 0,30 |  |  |  |
| 271 | n.d.                        | 3163 |      |      |      |      |      |      |      |      |      |      | 0,23 |      |      |      |      |      |      |      |      |      |      |      |  |      |  |  |  |
| 272 | n.d.                        | 3190 |      |      |      |      |      |      |      |      |      |      |      |      |      |      |      |      |      |      |      |      |      |      |  |      |  |  |  |
| 273 | n.d.                        | 3197 |      |      |      |      |      |      |      |      |      |      |      |      |      |      |      |      |      |      |      |      |      |      |  |      |  |  |  |
| 274 | n.d.                        | 3214 | 0,30 |      | 0,22 |      |      |      |      |      |      |      |      |      |      |      |      |      |      |      |      |      |      |      |  |      |  |  |  |

**Table S2.** Complete list of constituents detected in the Sandalwood oils under study by GC-QTOF MS analysis using a DB-5 column.

| No. | Compound                     | LRI  | <i>S. album</i><br>EO-24 | <i>S. album</i><br>Ess-EO1 | <i>S. album</i> 19<br>doT-EO1 | <i>S. album</i> (ID)<br>doT-EO5 | <i>S. album</i> (ID)<br>doT-EO6 | <i>S. album</i> (IN)<br>doT-EO8 | <i>S. album</i> (AUS)<br>doT-EO11 | <i>S. paniculatum</i><br>Ess-EO5 | <i>S. paniculatum</i> 19<br>doT-EO2 | <i>S. paniculatum</i><br>doT-EO7 | <i>S. austrocaledonicum</i><br>doT-EO9 | <i>S. austrocaledonicum</i><br>doT-EO10 | <i>S. austrocaledonicum</i><br>Ess-EO4 | <i>Biotechn. synthetic</i><br>Isobionics | <i>S. spicatum</i><br>Ess-EO2 | <i>S. lanceolatum</i><br>Ess-EO3 | <i>A. balsamifera</i><br>Ess-EO6 | <i>B. huillensis</i><br>Ess-EO7 |
|-----|------------------------------|------|--------------------------|----------------------------|-------------------------------|---------------------------------|---------------------------------|---------------------------------|-----------------------------------|----------------------------------|-------------------------------------|----------------------------------|----------------------------------------|-----------------------------------------|----------------------------------------|------------------------------------------|-------------------------------|----------------------------------|----------------------------------|---------------------------------|
| 1   | n.d.                         | 1296 |                          |                            |                               |                                 |                                 |                                 |                                   |                                  |                                     |                                  | 0,11                                   | 0,15                                    |                                        |                                          |                               |                                  |                                  |                                 |
| 2   | n.d.                         | 1303 |                          |                            |                               |                                 |                                 |                                 |                                   |                                  |                                     |                                  | 0,11                                   | 0,13                                    |                                        |                                          |                               |                                  |                                  |                                 |
| 3   | n.d.                         | 1307 |                          |                            |                               |                                 |                                 |                                 |                                   |                                  |                                     |                                  | 0,11                                   | 0,13                                    |                                        |                                          |                               |                                  |                                  |                                 |
| 4   | n.d.                         | 1323 |                          |                            |                               |                                 |                                 |                                 | 0,17                              |                                  |                                     |                                  | 0,23                                   | 0,26                                    |                                        |                                          |                               |                                  |                                  |                                 |
| 5   | Tricycloekasantalal          | 1346 | 0,09                     | 0,08                       | 0,15                          | 0,12                            | 0,12                            |                                 | 0,19                              | 0,15                             |                                     |                                  |                                        |                                         | 0,05                                   |                                          |                               |                                  |                                  |                                 |
| 6   | Isoledene                    | 1377 |                          |                            |                               |                                 |                                 |                                 |                                   |                                  |                                     |                                  |                                        |                                         |                                        |                                          |                               |                                  |                                  | 0,40                            |
| 7   | Ylangene                     | 1380 |                          |                            |                               |                                 |                                 |                                 |                                   |                                  |                                     |                                  |                                        |                                         |                                        |                                          |                               |                                  |                                  | 1,30                            |
| 8   | $\alpha$ -Copaene            | 1385 |                          |                            |                               |                                 |                                 |                                 |                                   |                                  |                                     |                                  |                                        |                                         |                                        |                                          |                               |                                  |                                  | 1,06                            |
| 9   | n.d.                         | 1386 |                          |                            |                               |                                 |                                 |                                 |                                   | 0,03                             |                                     |                                  |                                        |                                         |                                        |                                          |                               |                                  |                                  |                                 |
| 10  | n.d.                         | 1395 |                          | 0,03                       |                               |                                 |                                 |                                 |                                   |                                  |                                     |                                  |                                        |                                         |                                        |                                          |                               |                                  |                                  |                                 |
| 11  | n.d.                         | 1397 |                          |                            |                               |                                 |                                 |                                 |                                   | 0,05                             |                                     |                                  |                                        |                                         | 0,04                                   |                                          |                               |                                  |                                  |                                 |
| 12  | n.d.                         | 1400 |                          |                            |                               |                                 |                                 | 0,45                            |                                   |                                  |                                     |                                  | 0,62                                   | 0,66                                    |                                        |                                          |                               |                                  |                                  |                                 |
| 13  | n.d.                         | 1409 |                          |                            |                               |                                 |                                 |                                 |                                   |                                  |                                     |                                  |                                        |                                         |                                        |                                          | 0,08                          | 0,16                             |                                  |                                 |
| 14  | n.d.                         | 1410 |                          |                            |                               |                                 |                                 |                                 |                                   |                                  |                                     |                                  | 0,13                                   |                                         |                                        |                                          |                               |                                  |                                  |                                 |
| 15  | cis- $\alpha$ -Bergamotene   | 1419 |                          |                            |                               |                                 |                                 |                                 |                                   |                                  |                                     |                                  |                                        |                                         |                                        | 0,02                                     |                               |                                  |                                  |                                 |
| 16  | n.d.                         | 1420 |                          |                            |                               |                                 |                                 |                                 | 0,12                              |                                  |                                     |                                  |                                        |                                         |                                        |                                          |                               |                                  |                                  |                                 |
| 17  | $\alpha$ -Cedrene            | 1423 |                          |                            |                               |                                 |                                 |                                 |                                   |                                  |                                     |                                  |                                        |                                         |                                        |                                          | 0,11                          | 0,47                             |                                  |                                 |
| 18  | $\alpha$ -Santalene          | 1425 | 1,03                     | 1,31                       | 0,60                          | 0,56                            | 0,72                            | 0,54                            | 0,88                              | 1,21                             | 1,14                                | 0,86                             | 1,09                                   | 1,10                                    | 0,79                                   | 4,56                                     | 0,68                          |                                  |                                  |                                 |
| 19  | trans- $\alpha$ -Bergamotene | 1438 | 0,19                     | 0,23                       | 0,13                          | 0,13                            | 0,15                            |                                 | 0,14                              | 0,16                             |                                     | 0,12                             | 0,15                                   | 0,14                                    | 0,11                                   | 0,88                                     | 0,24                          |                                  |                                  |                                 |
| 20  | epi- $\beta$ -Santalene      | 1451 | 1,21                     | 1,33                       | 0,77                          | 0,63                            | 0,87                            | 0,69                            | 1,14                              | 1,13                             | 0,99                                | 0,76                             | 0,92                                   | 0,85                                    | 0,65                                   | 0,24                                     | 0,43                          |                                  |                                  |                                 |
| 21  | Muuroala-4,5-diene           | 1455 |                          |                            |                               |                                 |                                 |                                 |                                   |                                  |                                     |                                  |                                        |                                         |                                        |                                          |                               |                                  | 0,35                             |                                 |
| 22  | (E)- $\beta$ -Farnesene      | 1455 |                          |                            |                               |                                 |                                 |                                 |                                   |                                  |                                     |                                  |                                        |                                         |                                        | 0,06                                     |                               |                                  |                                  |                                 |
| 23  | n.d.                         | 1459 |                          |                            |                               |                                 |                                 |                                 | 0,18                              |                                  |                                     |                                  | 0,27                                   | 0,22                                    |                                        |                                          |                               |                                  |                                  |                                 |
| 24  | n.d.                         | 1460 |                          |                            |                               |                                 |                                 |                                 |                                   |                                  |                                     |                                  |                                        |                                         |                                        |                                          |                               |                                  | 0,07                             |                                 |
| 25  | $\beta$ -Santalene           | 1463 | 1,83                     | 2,02                       | 1,10                          | 1,04                            | 1,25                            | 1,08                            | 1,55                              | 1,47                             | 1,04                                | 0,97                             | 0,92                                   | 0,83                                    | 0,62                                   | 1,51                                     | 0,63                          |                                  |                                  |                                 |
| 26  | $\alpha$ -Acoradiene         | 1465 |                          |                            |                               |                                 |                                 |                                 |                                   |                                  |                                     |                                  |                                        |                                         |                                        |                                          |                               |                                  | 1,05                             |                                 |
| 27  | $\beta$ -Acoradiene          | 1470 |                          |                            |                               |                                 |                                 |                                 |                                   |                                  |                                     |                                  |                                        |                                         |                                        |                                          | 0,15                          | 0,42                             |                                  |                                 |
| 28  | n.d.                         | 1471 |                          |                            |                               |                                 |                                 |                                 |                                   |                                  |                                     |                                  |                                        |                                         |                                        | 0,09                                     |                               |                                  |                                  |                                 |

|    |                                                           |      |      |      |      |      |      |      |      |      |      |      |      |      |      |      |      |      |      |       |  |      |      |
|----|-----------------------------------------------------------|------|------|------|------|------|------|------|------|------|------|------|------|------|------|------|------|------|------|-------|--|------|------|
| 29 | n.d.                                                      | 1472 | 0,04 | 0,04 |      |      |      |      |      | 0,12 | 0,07 |      |      | 0,21 |      | 0,19 | 0,05 |      |      |       |  |      |      |
| 30 | n.d.                                                      | 1480 |      |      |      |      |      |      |      |      |      |      |      |      |      |      |      |      | 0,09 |       |  |      |      |
| 31 | γ-Muurolene                                               | 1481 |      |      |      |      |      |      |      |      |      |      |      |      |      |      |      |      |      | 0,34  |  |      |      |
| 32 | γ-Curcumene                                               | 1482 | 0,02 | 0,14 |      |      |      |      |      |      |      |      |      | 0,03 |      |      | 0,21 | 0,56 | 0,22 |       |  |      |      |
| 33 | Amorpha-4-11-<br>diene                                    | 1484 |      |      |      |      |      |      |      |      |      |      |      |      |      |      |      |      |      | 0,14  |  |      |      |
| 34 | n.d.                                                      | 1485 |      |      |      |      |      |      |      |      |      |      |      |      |      |      |      |      | 0,09 |       |  |      |      |
| 35 | α-Amorphene                                               | 1485 |      |      |      |      |      |      |      |      |      |      |      |      |      |      |      |      |      | 12,09 |  |      |      |
| 36 | α-Curcumene                                               | 1486 | 0,40 | 0,39 | 0,37 | 0,28 | 0,33 | 0,29 | 0,43 | 0,37 | 0,39 | 0,39 | 0,31 | 0,35 | 0,26 | 0,53 |      |      | 0,84 | 2,08  |  |      |      |
| 37 | cis-4-10-<br>Epoxyamorphane                               | 1487 |      |      |      |      |      |      |      |      |      |      |      |      |      |      |      |      |      | 0,80  |  |      |      |
| 38 | trans-β-<br>Bergamotene                                   | 1489 | 0,03 |      |      |      |      |      |      |      |      |      | 0,09 |      |      |      |      |      |      |       |  |      |      |
| 39 | n.d.                                                      | 1490 |      |      |      |      |      |      |      |      |      |      |      |      |      |      |      |      |      | 0,08  |  |      |      |
| 40 | n.d.                                                      | 1491 |      |      |      |      |      |      |      |      |      |      |      |      |      |      |      |      | 0,07 |       |  |      |      |
| 41 | n.d.                                                      | 1496 | 0,40 |      |      |      |      |      |      |      |      |      | 0,55 |      | 0,64 |      |      |      |      |       |  |      |      |
| 42 | 10,11-<br>Epoxycalamenene                                 | 1497 |      |      |      |      |      |      |      |      |      |      |      |      |      |      |      |      |      | 0,75  |  |      |      |
| 43 | α-Zingiberene                                             | 1499 | 0,05 |      |      |      |      |      |      |      |      |      | 0,13 |      |      |      |      |      |      |       |  | 0,69 | 0,73 |
| 44 | Pentadecane                                               | 1500 |      |      |      |      |      |      |      |      |      |      |      |      |      |      |      |      | 0,22 | 0,49  |  |      |      |
| 45 | γ-Amorphene                                               | 1501 |      |      |      |      |      |      |      |      |      |      |      |      |      |      |      |      |      | 2,76  |  |      |      |
| 46 | n.d.                                                      | 1502 |      |      |      |      |      |      |      |      |      |      |      |      |      |      |      |      | 0,02 |       |  |      |      |
| 47 | n.d.                                                      | 1504 |      |      |      |      |      |      |      |      |      |      |      |      |      |      |      |      | 0,04 |       |  |      |      |
| 48 | α-Muurolene                                               | 1505 |      |      |      |      |      |      |      |      |      |      |      |      |      |      |      |      |      | 1,25  |  |      |      |
| 49 | n.d.                                                      | 1505 |      |      |      |      |      |      |      |      |      |      |      |      |      |      |      |      | 0,15 |       |  |      |      |
| 50 | β-<br>Dihydroagarofura<br>n                               | 1508 |      |      |      |      |      |      |      |      |      |      |      |      |      |      |      |      |      | 0,57  |  |      |      |
| 51 | β-Bisabolene                                              | 1511 | 0,04 | 0,05 | t    | 0,08 | 0,07 | 0,03 | t    | 0,12 | 0,31 | 0,08 | t    | t    | 0,25 | 0,05 | 0,11 | 1,87 | 0,75 |       |  |      |      |
| 52 | 2,4-di-tert-<br>butylphenol                               | 1511 | 0,07 |      |      |      | t    | t    | t    | 1,26 | t    |      | t    | 1,83 | 1,85 |      |      |      |      |       |  |      |      |
| 53 | β-Cadinene                                                | 1512 |      |      |      |      |      |      |      |      |      |      |      |      |      |      |      |      |      | 0,48  |  |      |      |
| 54 | β-Curcumene                                               | 1514 | 0,11 | 0,15 | 0,06 | 0,12 | 0,09 | t    | t    | 0,26 | 0,16 | 0,11 | 0,15 | 0,16 | 0,10 | 0,53 |      |      | 1,30 |       |  |      |      |
| 55 | n.d.                                                      | 1515 |      |      |      |      |      |      |      |      |      |      |      |      |      |      |      |      |      | 0,52  |  |      |      |
| 56 | n.d.                                                      | 1516 |      |      |      |      |      |      |      |      |      |      |      |      |      |      |      |      | 0,02 |       |  |      |      |
| 57 | Sesquicineole                                             | 1517 |      |      |      |      |      |      |      |      |      |      |      |      |      |      |      |      | 0,23 | 0,16  |  |      |      |
| 58 | γ-Cadinene                                                | 1519 |      |      |      |      |      |      |      |      |      |      |      |      |      |      |      |      |      | 0,72  |  |      |      |
| 59 | n.d.                                                      | 1519 |      |      |      |      |      |      |      |      |      |      |      |      |      |      |      |      | 0,24 |       |  |      |      |
| 60 | 5-(2,3-Dimethyltri-<br>cyclo-heptan-3-<br>yl)pentan-2-one | 1521 | 0,33 | 0,39 | 0,23 |      |      | 0,34 | 0,12 | 0,29 |      |      |      |      |      |      |      |      |      |       |  |      |      |

|    |                                      |      |      |      |      |      |      |      |      |      |      |      |      |      |      |      |      |       |      |      |      |
|----|--------------------------------------|------|------|------|------|------|------|------|------|------|------|------|------|------|------|------|------|-------|------|------|------|
| 61 | 7-epi- $\alpha$ -Selinene            | 1522 |      |      |      |      |      |      |      |      |      |      |      |      |      |      |      | 0,22  |      |      |      |
| 62 | cis-Calamenene                       | 1526 |      |      |      |      |      |      |      |      |      |      |      |      |      |      |      | 6,93  |      |      |      |
| 63 | $\beta$ -<br>Sesquiphellandren       | 1526 |      |      |      |      |      |      |      |      |      |      |      |      |      |      |      | 0,08  | 0,18 | 1,18 |      |
| 64 | Cypernepoxide                        | 1535 |      |      |      |      |      |      |      |      |      |      |      |      |      |      |      | 0,27  |      |      |      |
| 65 | n.d.                                 | 1537 |      |      |      |      |      |      |      |      |      |      |      |      |      |      |      | 0,10  |      |      |      |
| 66 | n.d.                                 | 1539 |      |      |      |      |      |      |      |      |      |      |      |      |      |      |      | 0,10  |      |      |      |
| 67 | 7-methy-<br>Pentadecane              | 1539 |      |      |      |      |      |      |      |      |      |      |      |      |      |      |      | 0,25  | 0,34 |      |      |
| 68 | $\gamma$ -Dehydro-ar-<br>Himachalene | 1542 |      |      |      |      |      |      |      |      |      |      |      |      |      |      |      | 0,67  |      |      |      |
| 69 | n.d.                                 | 1543 | 0,38 | 0,44 | 0,17 | 0,28 | 0,24 | 0,18 | 0,25 |      |      |      |      | 0,05 | 0,12 |      |      |       |      |      |      |
| 70 | 3,7-Selinadiene                      | 1544 |      |      |      |      |      |      |      |      |      |      |      |      |      |      |      | 1,02  |      |      |      |
| 71 | $\alpha$ -Calacorene                 | 1546 |      |      |      |      |      |      |      |      |      |      |      |      |      |      |      | 5,30  |      |      |      |
| 72 | n.d.                                 | 1546 |      |      |      |      |      |      |      |      |      |      |      |      |      |      |      | 0,09  |      |      |      |
| 73 | $\alpha$ -Agarofuran                 | 1549 |      |      |      |      |      |      |      |      |      |      |      |      |      |      |      | 0,27  |      |      |      |
| 74 | n.d.                                 | 1550 |      |      |      |      |      |      |      |      |      |      |      |      |      |      |      | 0,10  |      |      |      |
| 75 | $\alpha$ -Elemol                     | 1551 |      |      |      |      |      |      |      |      |      |      |      |      |      |      |      | 8,51  |      |      |      |
| 76 | n.d.                                 | 1552 |      |      |      |      |      |      |      |      |      |      |      |      |      |      |      | 0,83  |      |      |      |
| 77 | n.d.                                 | 1555 | 0,17 | 0,22 | 0,12 |      |      | 0,19 |      |      |      |      |      |      |      |      |      |       |      |      |      |
| 78 | n.d.                                 | 1556 |      |      |      |      |      |      |      |      |      |      |      |      |      |      |      | 0,11  |      |      |      |
| 79 | (E)-Nerolidol                        | 1564 | 0,17 | 0,10 | 0,19 | 0,16 | 0,19 | 0,11 | 0,27 | 0,15 | 0,29 | 0,22 | 0,20 | 0,19 | 0,19 | 2,74 | 0,94 | 0,60  |      |      |      |
| 80 | Dendrolasin                          | 1573 |      |      |      |      |      |      |      |      |      |      |      |      |      |      |      | 0,06  | 0,07 | 1,95 | 0,87 |
| 81 | n.d.                                 | 1576 |      |      |      |      |      |      |      |      |      |      |      |      |      |      |      | 0,46  |      |      |      |
| 82 | n.d.                                 | 1576 |      |      |      |      |      |      |      |      |      |      |      |      |      |      |      | 0,12  |      |      |      |
| 83 | n.d.                                 | 1577 |      |      |      |      |      |      |      |      |      |      |      |      |      |      |      | 0,08  |      |      |      |
| 84 | n.d.                                 | 1580 |      |      |      |      |      |      |      |      |      |      |      |      |      |      |      | 0,06  |      |      |      |
| 85 | n.d.                                 | 1582 |      |      |      |      |      |      |      |      |      |      |      |      |      |      |      | 0,22  |      |      |      |
| 86 | Acetyldihydroalbe<br>ne              | 1584 | 0,06 | 0,15 |      |      | 0,33 |      |      | 0,18 | 0,05 | 0,22 | 0,22 | 0,13 | 0,11 | 0,14 |      |       |      |      |      |
| 87 | Gleenol                              | 1587 |      |      |      |      |      |      |      |      |      |      |      |      |      |      |      | 0,82  |      |      |      |
| 88 | n.d.                                 | 1588 |      |      |      |      |      |      |      |      |      |      |      |      |      |      |      | 0,38  |      |      |      |
| 89 | n.d.                                 | 1588 |      |      |      |      |      |      |      |      |      |      |      |      |      |      |      | 0,08  |      |      |      |
| 90 | n.d.                                 | 1596 | 0,06 | 0,04 | 0,11 |      |      |      |      | 0,01 |      |      |      |      |      |      |      |       |      |      |      |
| 91 | Spirojatamol                         | 1597 |      |      |      |      |      |      |      |      |      |      |      |      |      |      |      | 10,77 |      |      |      |
| 92 | n.d.                                 | 1599 |      |      |      |      |      |      |      |      |      |      |      |      |      |      |      | 0,14  |      |      |      |
| 93 | Guaiol                               | 1600 |      |      |      |      |      |      |      |      |      |      |      |      |      |      |      | 0,38  |      |      |      |
| 94 | Hexadecane                           | 1600 |      |      |      |      |      |      |      |      |      |      |      |      |      |      |      | 0,18  | 0,21 | 0,24 |      |
| 95 | n.d.                                 | 1603 |      |      |      |      |      |      |      |      |      |      |      |      |      |      |      | 0,14  |      |      |      |
| 96 | 5-epi-7epi- $\alpha$ -<br>Eudesmol   | 1604 |      |      |      |      |      |      |      |      |      |      |      |      |      |      |      | 0,59  |      |      |      |

|     |                            |      |      |      |      |      |      |      |      |      |      |      |      |      |       |      |
|-----|----------------------------|------|------|------|------|------|------|------|------|------|------|------|------|------|-------|------|
| 97  | Copaborneol                | 1607 |      |      |      |      |      |      |      |      |      |      |      |      | 1,86  |      |
| 98  | n.d.                       | 1608 |      |      |      |      |      |      |      |      |      |      |      |      | 0,78  |      |
| 99  | $\beta$ -Oplopenone        | 1610 |      |      |      |      |      |      |      |      |      |      |      |      | 3,62  |      |
| 100 | n.d.                       | 1613 |      |      |      |      |      |      |      |      |      |      |      |      | 0,30  |      |
| 101 | n.d.                       | 1614 |      |      |      |      |      |      |      |      |      |      |      |      | 0,15  |      |
| 102 | n.d.                       | 1615 | 0,18 |      |      |      |      |      |      |      |      |      |      |      |       |      |
| 103 | n.d.                       | 1617 |      |      |      |      |      |      |      |      |      |      |      |      | 0,02  |      |
| 104 | n.d.                       | 1619 |      |      |      |      |      |      |      |      |      |      |      |      | 0,72  |      |
| 105 | 10-epi- $\gamma$ -Eudesmol | 1620 |      |      |      |      |      |      |      |      |      |      |      |      | 6,73  |      |
| 106 | $\alpha$ -Corocalene       | 1622 |      |      |      |      |      |      |      |      |      |      |      |      | 0,82  |      |
| 107 | n.d.                       | 1624 |      |      |      |      |      |      |      |      |      |      |      |      | 2,80  |      |
| 108 | n.d.                       | 1624 |      |      |      |      |      |      |      |      |      |      |      |      | 0,26  | 0,51 |
| 109 | n.d.                       | 1627 |      |      |      |      |      |      |      |      |      |      |      |      | 0,49  |      |
| 110 | Epicubenol                 | 1627 |      |      |      |      |      |      |      |      |      |      |      |      | 2,80  |      |
| 111 | $\alpha$ -Acorenol         | 1629 |      |      |      |      |      |      |      |      |      |      |      |      | 0,28  | 0,20 |
| 112 | n.d.                       | 1630 |      |      |      |      |      |      |      |      |      |      |      |      | 1,31  |      |
| 113 | $\gamma$ -Eudesmol         | 1630 |      |      |      |      |      |      |      |      |      |      |      |      | 10,3  |      |
|     |                            |      |      |      |      |      |      |      |      |      |      |      |      |      | 6     |      |
| 114 | n.d.                       | 1631 |      |      |      |      |      |      |      |      |      |      |      |      | 3,17  |      |
| 115 | Hinesol                    | 1637 |      |      |      |      |      |      |      |      |      |      |      |      | 0,30  |      |
| 116 | Cubenol                    | 1639 |      |      |      |      |      |      |      |      |      |      |      |      | 0,53  |      |
| 117 | $\tau$ -Cadinol            | 1640 |      |      |      |      |      |      |      |      |      |      |      |      | 0,98  | 1,97 |
| 118 | n.d.                       | 1644 |      |      |      |      |      |      |      |      |      |      |      |      | 0,85  |      |
| 119 | n.d.                       | 1644 |      |      |      |      |      |      |      |      |      |      |      |      | 0,09  |      |
| 120 | n.d.                       | 1646 |      |      |      |      |      |      |      |      |      |      |      |      | 0,08  |      |
| 121 | Ylangenol                  | 1647 |      |      |      |      |      |      |      |      |      |      |      |      | 10,80 |      |
| 122 | $\beta$ -Eudesmol          | 1648 |      |      |      |      |      |      |      |      |      |      |      |      | 8,34  |      |
| 123 | n.d.                       | 1648 | 0,19 |      |      |      |      |      |      |      |      |      |      |      |       |      |
| 124 | $\alpha$ -Muurolol         | 1649 |      |      |      |      |      |      |      |      |      |      |      |      | 1,92  |      |
| 125 | Valerianol                 | 1650 |      |      |      |      |      |      |      |      |      |      |      |      | 34,7  |      |
|     |                            |      |      |      |      |      |      |      |      |      |      |      |      |      | 3     |      |
| 126 | n.d.                       | 1651 | 0,21 | 0,44 | 0,15 | 0,29 | 0,25 | 0,31 | 0,42 | 0,28 | 0,15 | 0,14 | 0,16 |      |       |      |
| 127 | $\alpha$ -Cadinol          | 1652 |      |      |      |      |      |      |      |      |      |      |      |      | 1,42  |      |
| 128 | n.d.                       | 1652 |      |      |      |      |      |      |      |      |      |      |      |      | 0,18  |      |
| 129 | 7-epi- $\alpha$ -Eudesmol  | 1655 |      |      |      |      |      |      |      |      |      |      |      |      | 9,75  |      |
| 130 | n.d.                       | 1656 | 0,05 |      | 0,47 | 0,30 | 0,27 | 0,26 | 0,35 | 0,23 |      |      | 0,06 |      |       |      |
| 131 | Ylangenal                  | 1659 |      |      |      |      |      |      |      |      |      |      |      |      | 8,81  |      |
| 132 | n.d.                       | 1659 |      |      |      |      |      |      |      |      |      |      |      |      | 0,13  |      |
| 133 | n.d.                       | 1661 | 0,32 |      |      |      |      |      |      |      |      |      |      |      |       |      |
| 134 | n.d.                       | 1663 |      | 0,18 | 0,33 | 0,23 | 0,44 |      | 0,53 |      |      | 0,19 |      | 0,13 |       |      |
| 135 | Bulnesol                   | 1665 |      |      |      |      |      |      |      |      |      |      |      |      | 0,50  |      |

|     |                                  |      |           |           |           |           |           |           |           |           |           |           |           |           |           |                     |           |                     |  |  |
|-----|----------------------------------|------|-----------|-----------|-----------|-----------|-----------|-----------|-----------|-----------|-----------|-----------|-----------|-----------|-----------|---------------------|-----------|---------------------|--|--|
| 137 | n.d.                             | 1666 |           |           |           |           |           |           |           |           |           |           |           |           |           |                     |           | 0,30                |  |  |
| 138 | Campherenol                      | 1667 | 0,06      | 0,27      | 0,39      | 0,44      | 0,41      | 0,35      | 0,34      | t         | 0,32      | 0,84      | 0,24      | 0,19      | 0,07      | t                   |           |                     |  |  |
| 139 | Cyclosantalal                    | 1668 | 0,39      | 0,30      | 0,59      | 0,31      | 0,28      | 1,32      | 0,50      | 1,14      | 1,86      | 1,52      | 1,58      | 1,30      | 1,30      |                     |           |                     |  |  |
| 140 | β-Bisabolol                      | 1669 | t         | t         | t         | t         | t         | t         | t         | t         | t         | t         | t         | t         | t         | 3,06 3,35           |           |                     |  |  |
| 141 | (Z)-α-Santalol                   | 1673 | 58,7<br>0 | 57,3<br>0 | 54,5<br>3 | 51,9<br>9 | 52,1<br>9 | 57,2<br>5 | 53,0<br>5 | 52,6<br>9 | 51,6<br>4 | 53,4<br>2 | 51,6<br>0 | 48,5<br>0 | 53,4<br>0 | 33,3<br>3           | 20,8<br>0 | 1,10                |  |  |
| 142 | Cadalene                         | 1673 |           |           |           |           |           |           |           |           |           |           |           |           |           |                     |           | 4,45                |  |  |
| 143 | n.d.                             | 1674 |           |           |           |           |           |           |           |           |           |           |           |           |           |                     |           | 0,38                |  |  |
| 144 | n.d.                             | 1676 | 0,04      | 0,50      | 0,11      |           |           |           |           |           |           |           |           |           | 0,14      |                     |           |                     |  |  |
| 145 | n.d.                             | 1681 |           |           |           |           |           |           |           |           |           |           |           |           |           |                     |           | 0,71                |  |  |
| 146 | n.d.                             | 1683 |           |           |           |           |           |           |           |           |           |           |           |           |           |                     |           | 0,32                |  |  |
| 147 | α-Bisabolol                      | 1685 | 0,07      | 0,07      | t         | 0,09      | 0,10      | t         | 0,16      | t         | t         | t         | t         | 0,47      | 0,56      | 9,60 3,04           |           |                     |  |  |
| 148 | epi-Cyclosantalal                | 1686 | t         | t         | 0,48      | t         | t         | 0,97      | t         | 0,83      | 1,20      | 1,26      | 1,00      | 0,96      | 0,29      |                     |           |                     |  |  |
| 149 | n.d.                             | 1687 |           |           |           |           |           |           |           |           |           |           |           |           |           |                     |           | 0,14                |  |  |
| 150 | trans-α-Bergamotol               | 1690 | 4,80      | 5,55      | 4,08      | 6,91      | 6,35      | 4,60      | 4,04      | 4,17      | 5,58      | 3,29      | 5,21      | 5,49      | 4,66      | 1,49                | 3,78      |                     |  |  |
| 151 | n.d.                             | 1692 |           |           |           |           |           |           |           |           |           |           |           |           |           |                     |           | 0,22                |  |  |
| 152 | Selin-7(11)-en-4-ol              | 1694 |           |           |           |           |           |           |           |           |           |           |           |           |           |                     |           | 0,10                |  |  |
| 153 | (E)-α-Santalol                   | 1695 | 0,30      | 0,18      | 0,39      | 0,20      | 0,23      | 0,35      | 0,17      | 0,12      | 0,20      | 0,24      | 0,12      | 0,17      | 0,03      | 16,8<br>4           | 0,21      |                     |  |  |
| 154 | n.d.                             | 1699 |           |           |           |           |           |           |           |           |           |           |           |           |           |                     |           | 0,09 0,16           |  |  |
| 155 | 4-Isopropyl-6-methyl-1-tetralone | 1700 |           |           |           |           |           |           |           |           |           |           |           |           |           |                     |           | 1,34                |  |  |
| 156 | n.d.                             | 1700 |           |           |           |           |           |           |           |           |           |           |           |           |           |                     |           | 0,59                |  |  |
| 157 | (Z)-epi-β-Santalol               | 1702 | 3,30      | 2,86      | 4,62      | 3,49      | 3,53      | 4,32      | 4,27      | 3,93      | 3,92      | 4,18      | 3,56      | 3,32      | 3,01      | 5,23                | 1,35      | 0,23                |  |  |
| 158 | n.d.                             | 1708 | 0,35      |           |           |           |           |           |           |           |           |           | 0,50      |           |           |                     | 0,56      |                     |  |  |
| 159 | (E)-trans-α-Bergamotol           | 1709 | 0,47      | 0,19      | 0,70      | 0,61      |           |           | 1,08      | 0,27      | 0,54      | 0,42      |           |           | 0,43      | 0,34                | 0,76      | 0,25                |  |  |
| 160 | n.d.                             | 1711 |           |           |           |           |           |           |           |           |           |           |           |           |           |                     |           | 0,46 1,15           |  |  |
| 161 | (Z)-β-Santalol                   | 1714 | 21,2<br>5 | 20,4<br>1 | 23,7<br>5 | 22,7<br>0 | 23,2<br>9 | 22,1<br>6 | 21,7<br>6 | 15,1<br>5 | 17,4<br>6 | 16,1<br>9 | 17,4<br>6 | 16,9<br>3 | 17,8<br>6 | 23,1<br>5           | 7,73      | 0,45                |  |  |
| 162 | (2E,6E)-Farnesol                 | 1720 | 0,29      |           |           |           |           |           |           |           |           |           | 0,31      | t         | 0,17      | 0,19                | 1,19      | 14,5<br>7 3,27 0,15 |  |  |
| 163 | (E)-epi-β-Santalol               | 1722 |           |           |           |           |           |           |           |           |           |           |           |           |           |                     |           | 2,49                |  |  |
| 164 | (Z)-Nuciferol                    | 1723 | 1,09      | 1,26      | 1,94      | 4,33      | 2,76      | 1,22      | 1,58      | 7,31      | 3,86      | 9,72      | 2,63      | 2,49      | 2,17      | 16,3<br>6 29,9<br>1 |           |                     |  |  |
| 165 | n.d.                             | 1730 |           |           |           |           |           |           |           |           |           |           |           |           |           |                     |           | 0,29                |  |  |
| 166 | n.d.                             | 1732 |           |           |           |           |           |           |           |           |           |           |           |           |           |                     |           | 0,13                |  |  |
| 167 | (E)-β-Santalol                   | 1734 | 1,54      | 1,81      | 1,27      | 1,13      | 1,23      | 0,95      | 0,92      | 0,44      | 0,20      | 0,58      | 0,16      | 0,10      | 0,08      | 7,79                | 0,17      |                     |  |  |
| 168 | Spirosantalol                    | 1735 | 0,22      | 0,29      | 0,54      | 1,04      | 1,02      | 0,55      | 0,55      | 1,49      | 0,75      | 2,47      | 0,59      | 0,56      | 0,26      | 0,52                |           |                     |  |  |
| 169 | Bisabolone**                     | 1735 |           |           |           |           |           |           |           |           |           |           |           |           |           |                     |           | 0,41                |  |  |

|     |                                |      |      |      |      |      |      |      |      |      |      |      |      |      |           |      |           |
|-----|--------------------------------|------|------|------|------|------|------|------|------|------|------|------|------|------|-----------|------|-----------|
| 170 | n.d.                           | 1738 |      |      |      |      |      |      |      |      |      |      |      |      |           |      | 0,48      |
| 171 | Bisabolone**                   | 1741 |      |      |      |      |      |      |      |      |      |      |      |      |           |      | 0,53      |
| 172 | n.d.                           | 1742 | 0,07 |      |      | 0,22 |      |      |      |      |      |      |      | 0,02 |           | 0,38 |           |
| 173 | n.d.                           | 1746 | 0,18 |      | 0,54 | 0,22 |      | 0,98 | 0,33 |      |      |      |      |      |           |      |           |
| 174 | n.d.                           | 1747 |      |      |      |      |      |      |      |      |      |      |      |      |           |      | 1,46      |
| 175 | n.d.                           | 1748 |      |      |      |      |      |      | 0,38 |      |      | 0,28 | 0,39 | 0,12 |           | 0,36 |           |
| 176 | n.d.                           | 1750 |      |      |      | 0,23 |      | 0,19 |      |      |      | 0,22 | 0,24 |      |           |      |           |
| 177 | (Z)- $\beta$ -Curcumen-12-ol   | 1753 | 0,11 | 0,18 | 0,06 | 0,35 | 0,12 | 0,02 |      | 1,59 | 0,58 | 0,48 | 0,46 | 0,29 | 0,30      | 5,74 | 9,90      |
| 178 | Drim-7-en-11-ol                | 1754 |      |      |      |      |      |      |      |      |      |      |      |      |           |      | 1,92      |
| 179 | (Z)-Lanceol                    | 1756 | 0,99 | 0,89 | 0,98 | 2,46 | 2,33 | 1,27 | 1,32 | 2,78 | 6,83 | 1,81 | 4,91 | 7,93 | 10,5<br>5 | 0,26 | 32,8<br>6 |
| 180 | n.d.                           | 1764 |      |      |      |      |      |      |      |      |      |      |      |      |           |      | 0,24      |
| 181 | (E)-Nuciferol                  | 1766 |      |      |      |      |      |      |      |      |      |      |      |      |           | 0,29 | 0,79      |
| 182 | n.d.                           | 1773 |      |      |      |      |      |      |      |      |      |      |      |      |           |      | 0,10      |
| 183 | n.d.                           | 1775 | 0,11 |      | 0,20 |      |      |      |      |      |      |      |      |      |           |      |           |
| 184 | n.d.                           | 1776 |      |      |      |      |      |      |      |      |      |      |      |      |           |      | 0,10      |
| 185 | n.d.                           | 1778 |      |      |      |      |      |      |      |      |      |      |      |      |           |      | 0,35      |
| 186 | n.d.                           | 1787 |      |      |      |      |      |      | 0,17 |      |      |      |      |      |           | 0,21 | 0,19      |
| 187 | n.d.                           | 1790 |      |      | 0,24 |      |      |      | 0,08 |      |      |      | 0,21 | 0,20 | 0,21      | 0,68 | 0,62      |
| 188 | n.d.                           | 1795 |      |      |      |      |      |      |      |      |      |      |      |      |           |      | 0,13      |
| 189 | 14-Hydroxy- $\delta$ -Cadinene | 1797 |      |      |      |      |      |      |      |      |      |      |      |      |           |      | 0,23      |
| 190 | n.d.                           | 1804 |      |      |      |      |      |      |      |      |      |      |      |      |           |      | 0,17      |
| 191 | 8-Ketocopaenal                 | 1807 |      |      |      |      |      |      |      |      |      |      |      |      |           |      | 1,61      |
| 192 | 8-Ketoylangenal                | 1821 |      |      |      |      |      |      |      |      |      |      |      |      |           |      | 1,62      |
| 193 | n.d.                           | 1837 | 0,05 |      |      |      |      |      |      |      |      |      |      |      |           |      |           |
| 194 | n.d.                           | 1866 |      |      |      |      |      |      |      |      |      |      |      |      |           |      | 0,07      |
| 195 | n.d.                           | 1879 |      |      |      |      |      |      |      |      |      |      |      |      |           |      | 0,26      |

t=tentative

\*\*= stereoisomer not determined

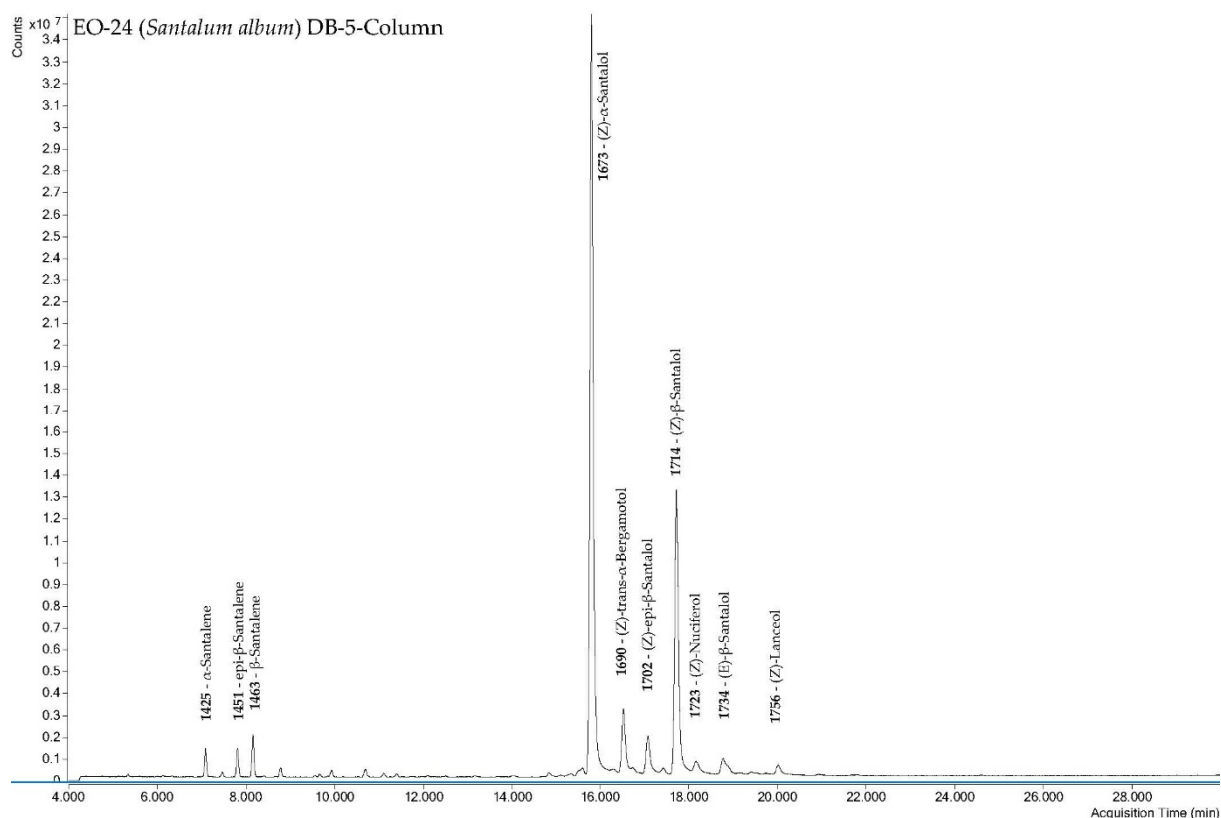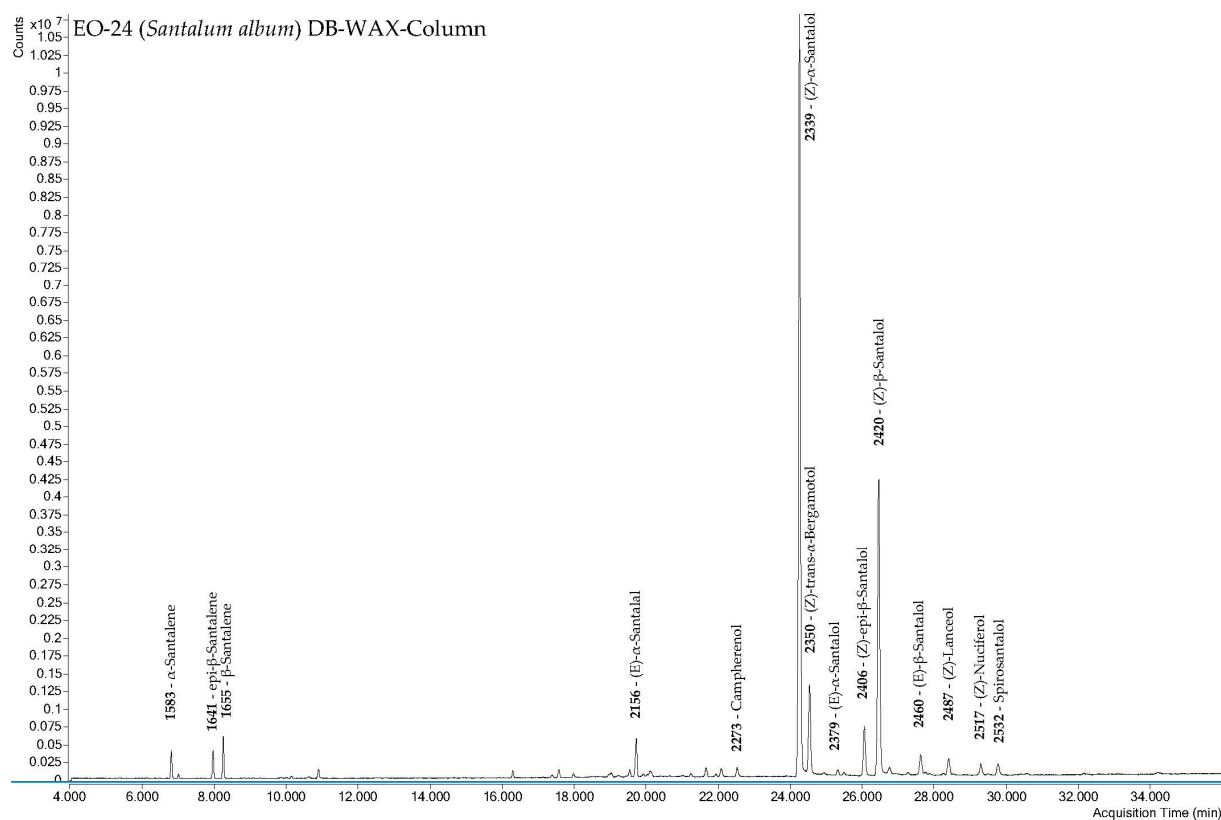

Figure S1. GC-MS chromatograms of EO-24 on DB-5 and DB-HeavyWAX-columns



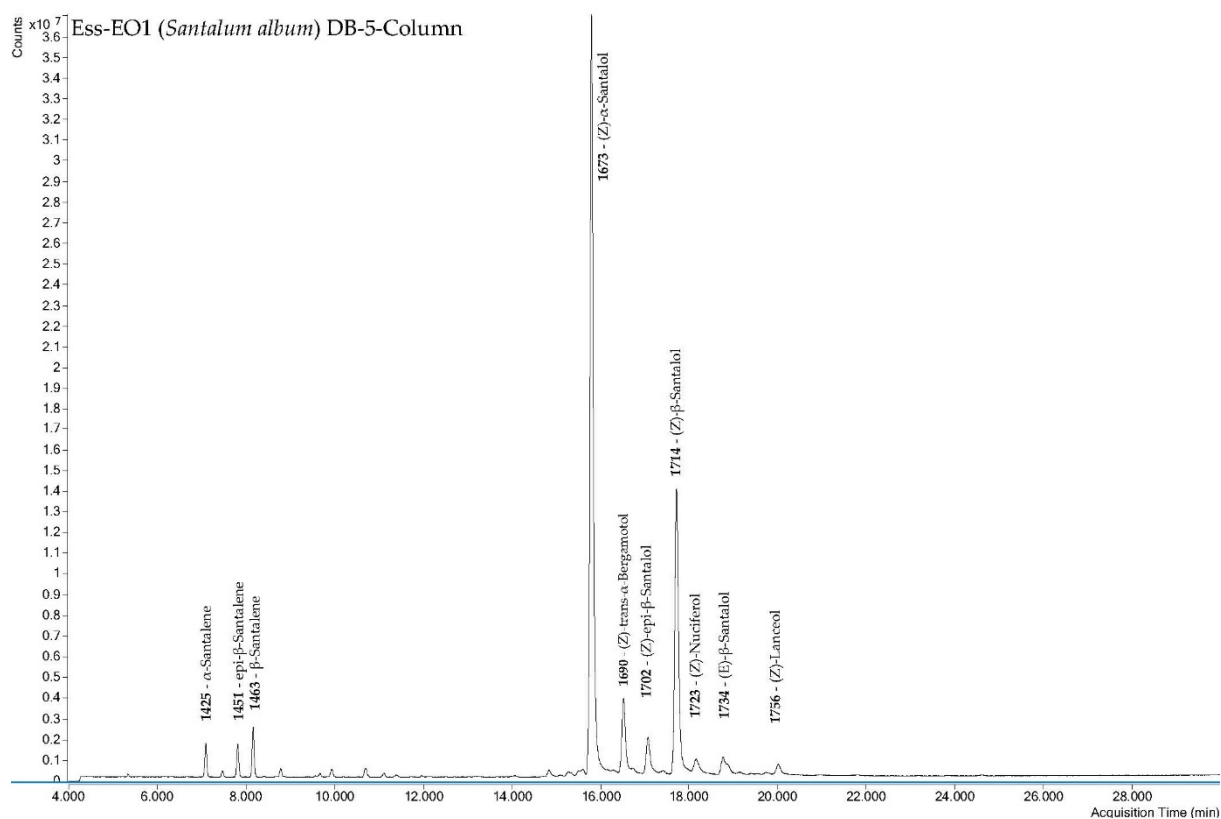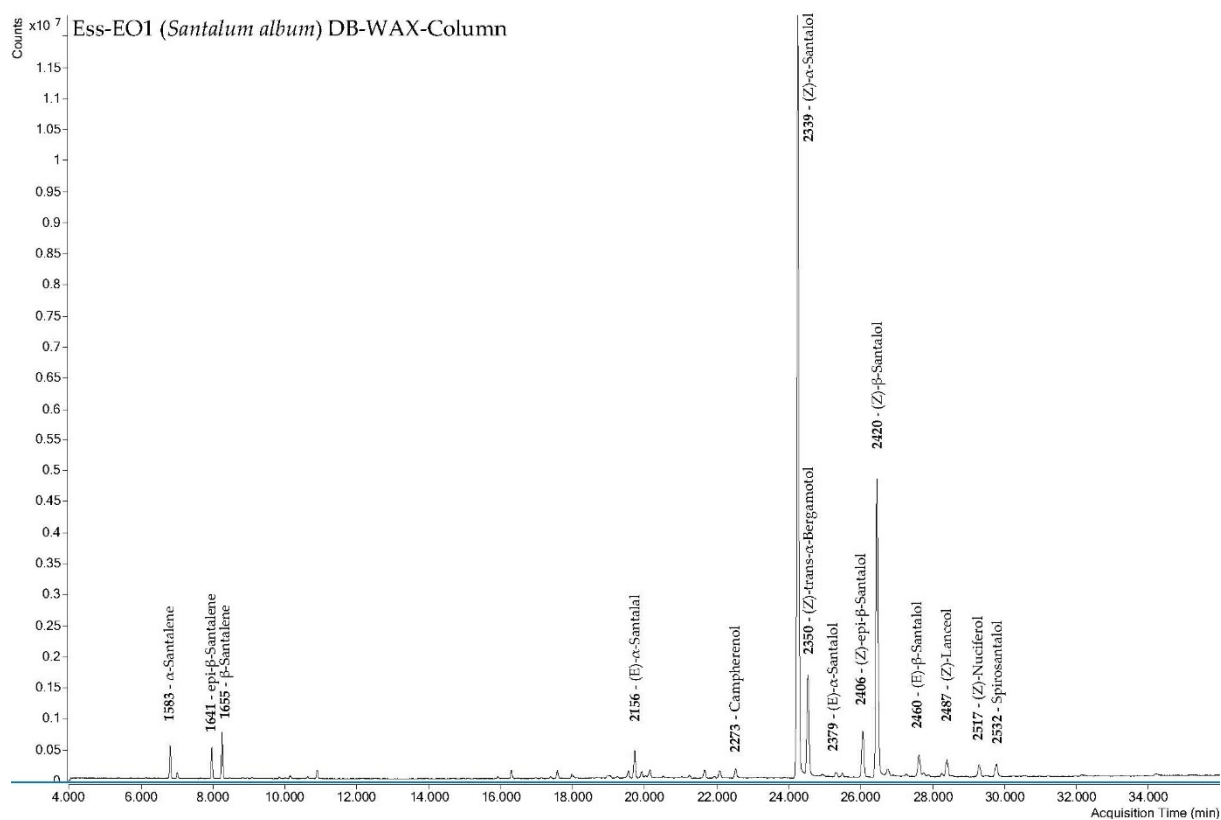

**Figure S2.** GC-MS chromatograms of Ess-EO1 on DB-5 and DB-HeavyWAX-columns

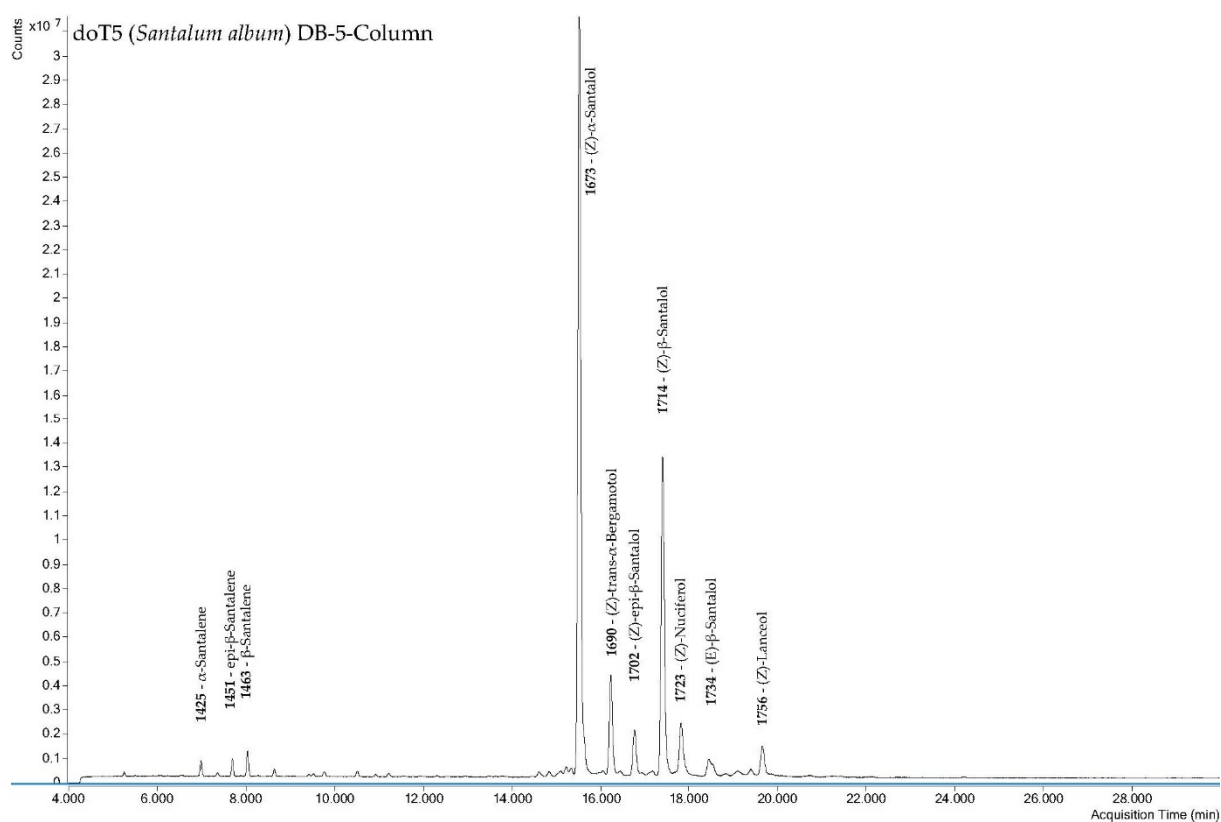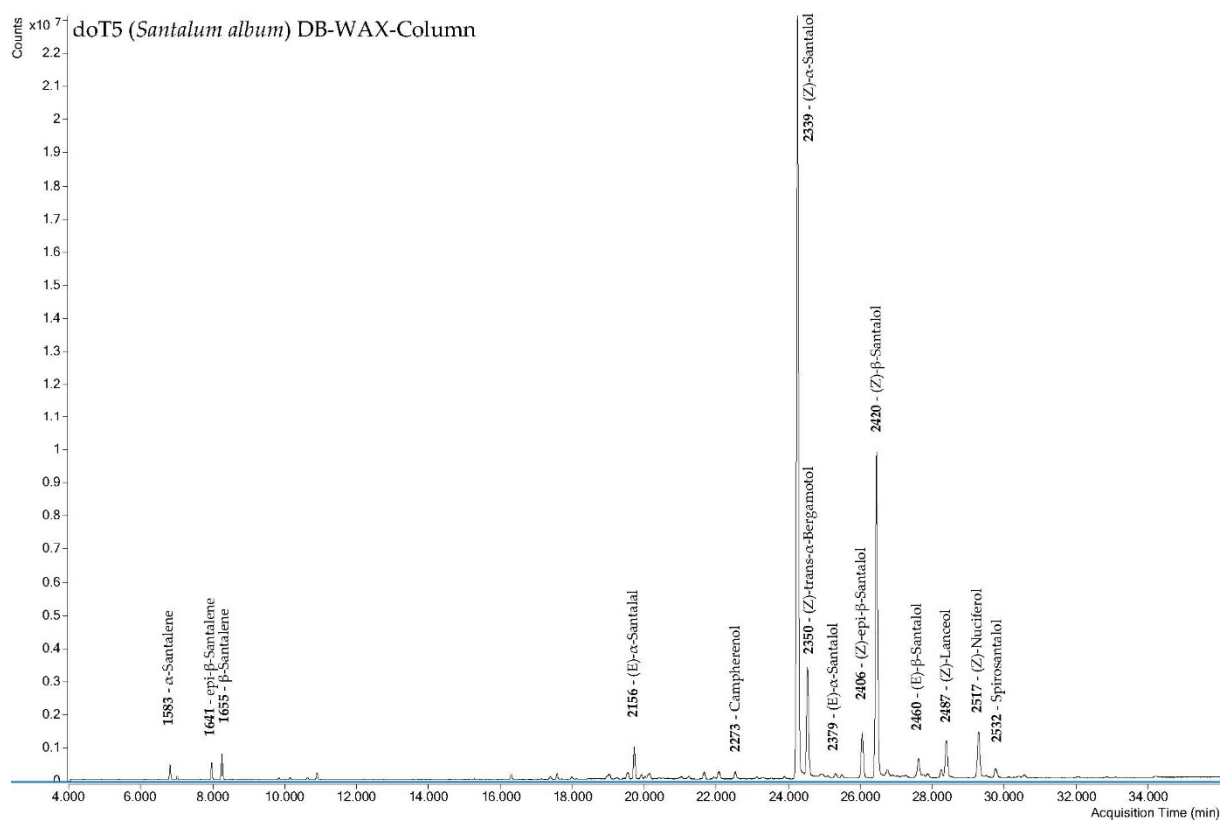

**Figure S3.** GC-MS chromatograms of doT5 on DB-5 and DB-HeavyWAX-columns

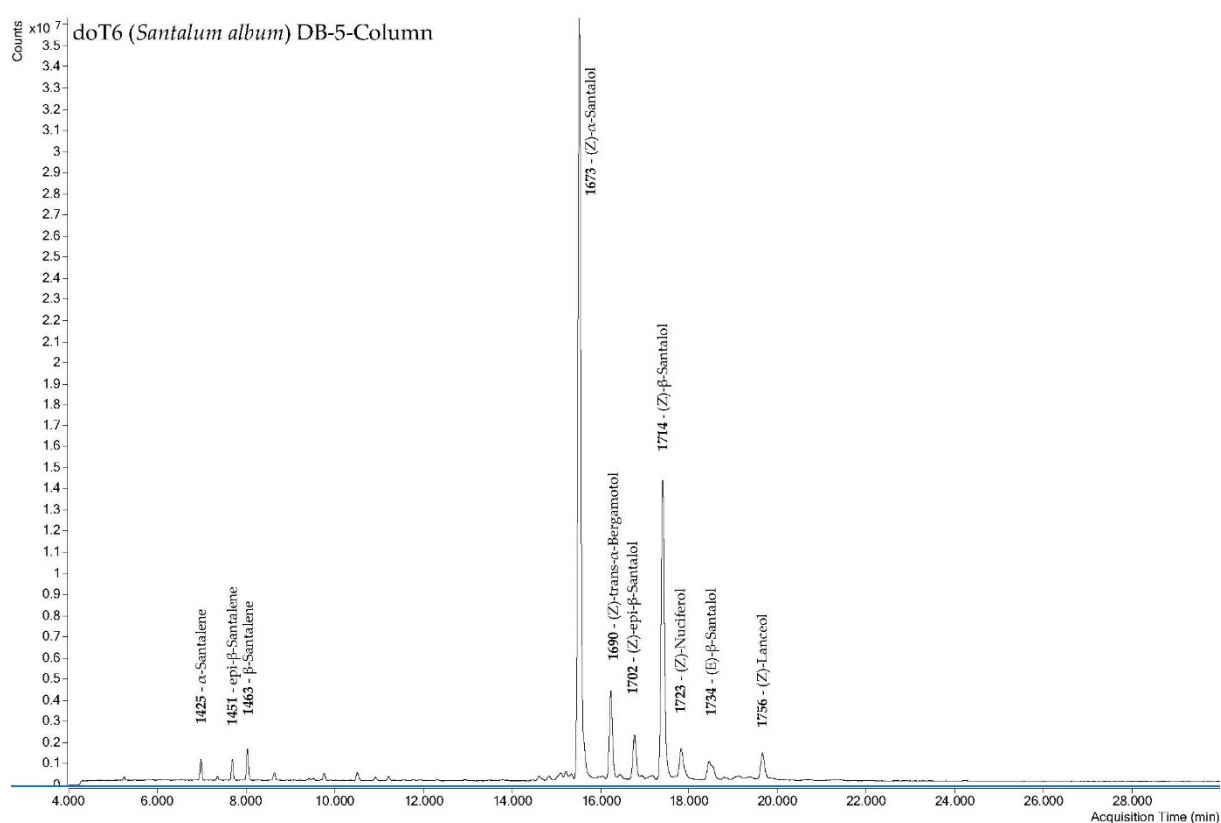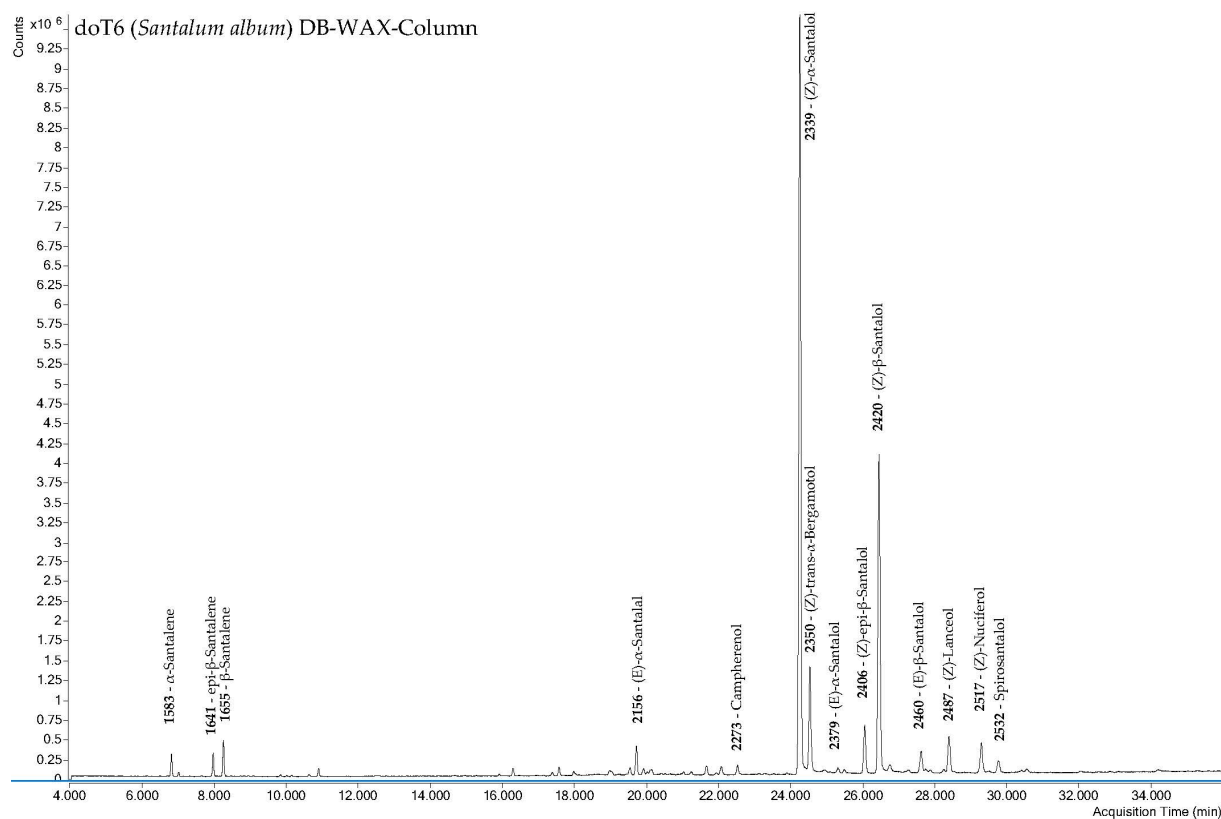

**Figure S4.** GC-MS chromatograms of doT6 on DB-5 and DB-HeavyWAX-columns

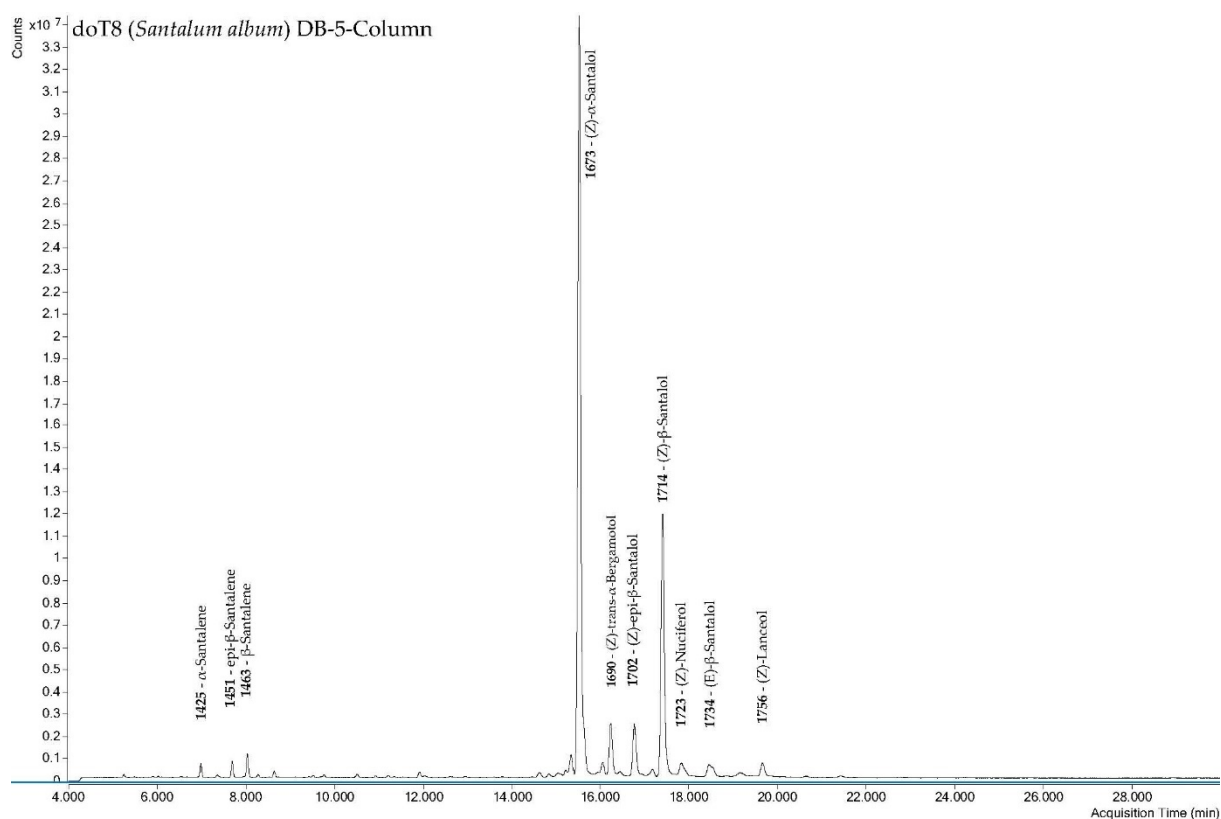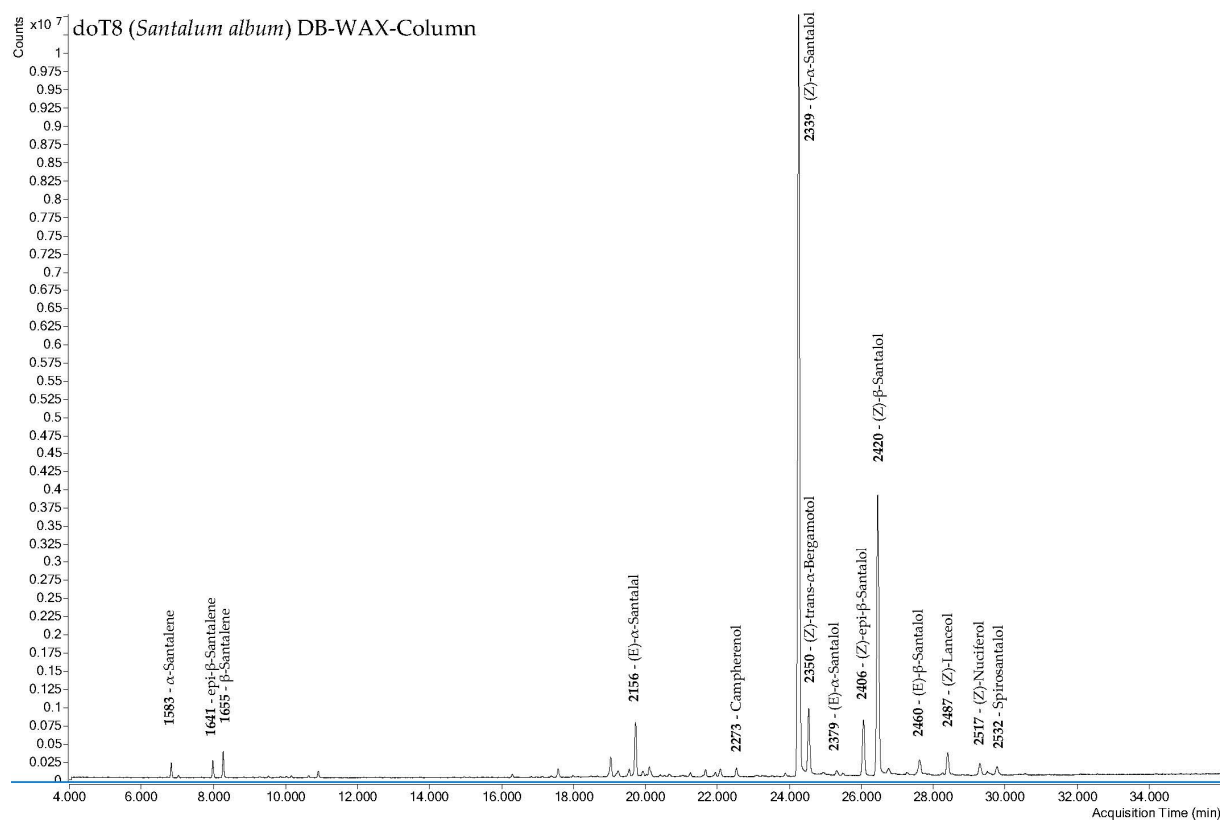

**Figure S5.** GC-MS chromatograms of doT8 on DB-5 and DB-HeavyWAX-columns

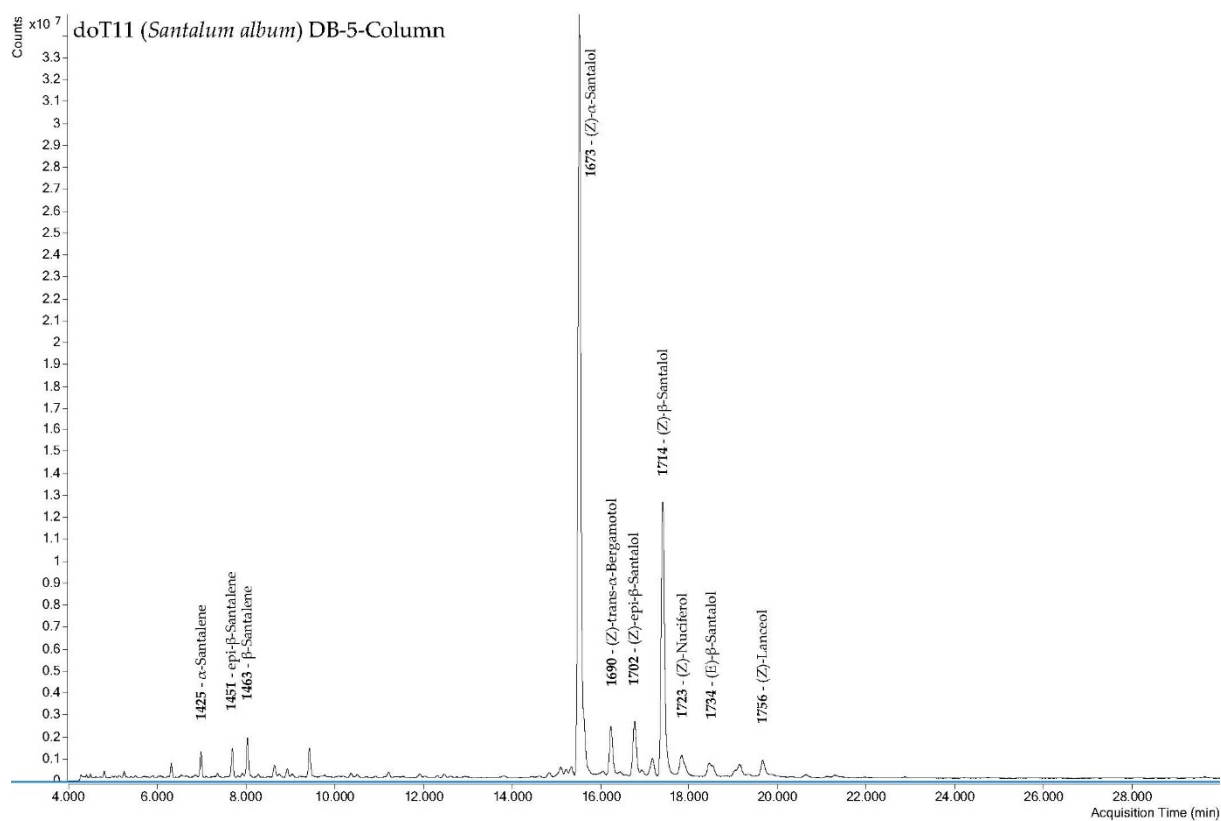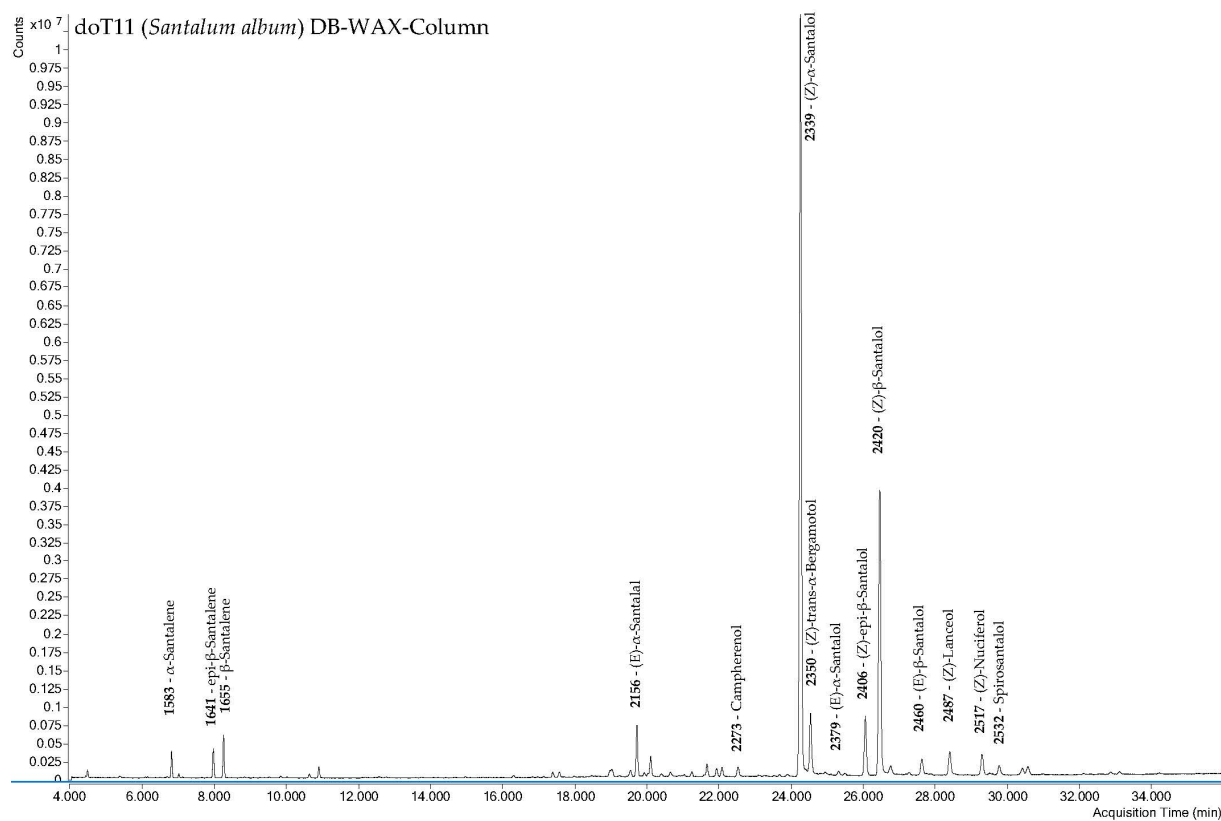

**Figure S6.** GC-MS chromatograms of doT11 on DB-5 and DB-HeavyWAX-columns

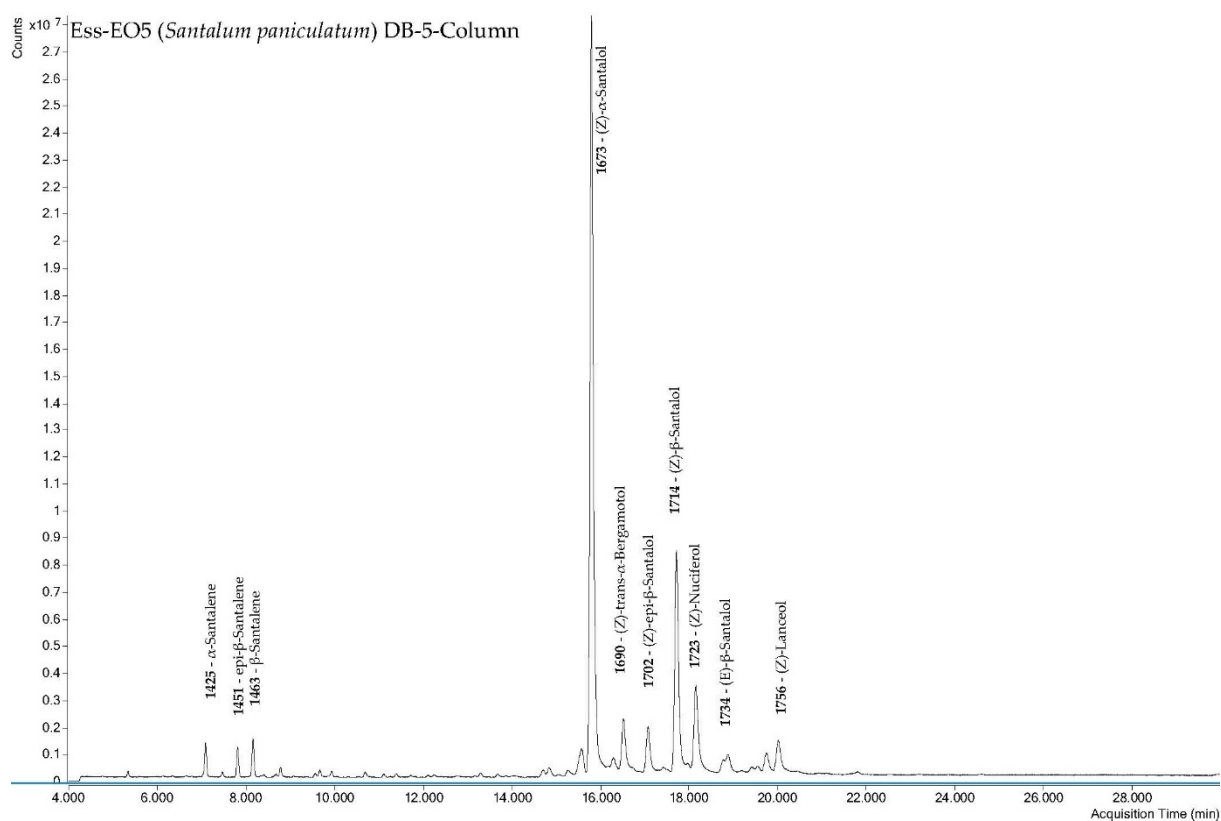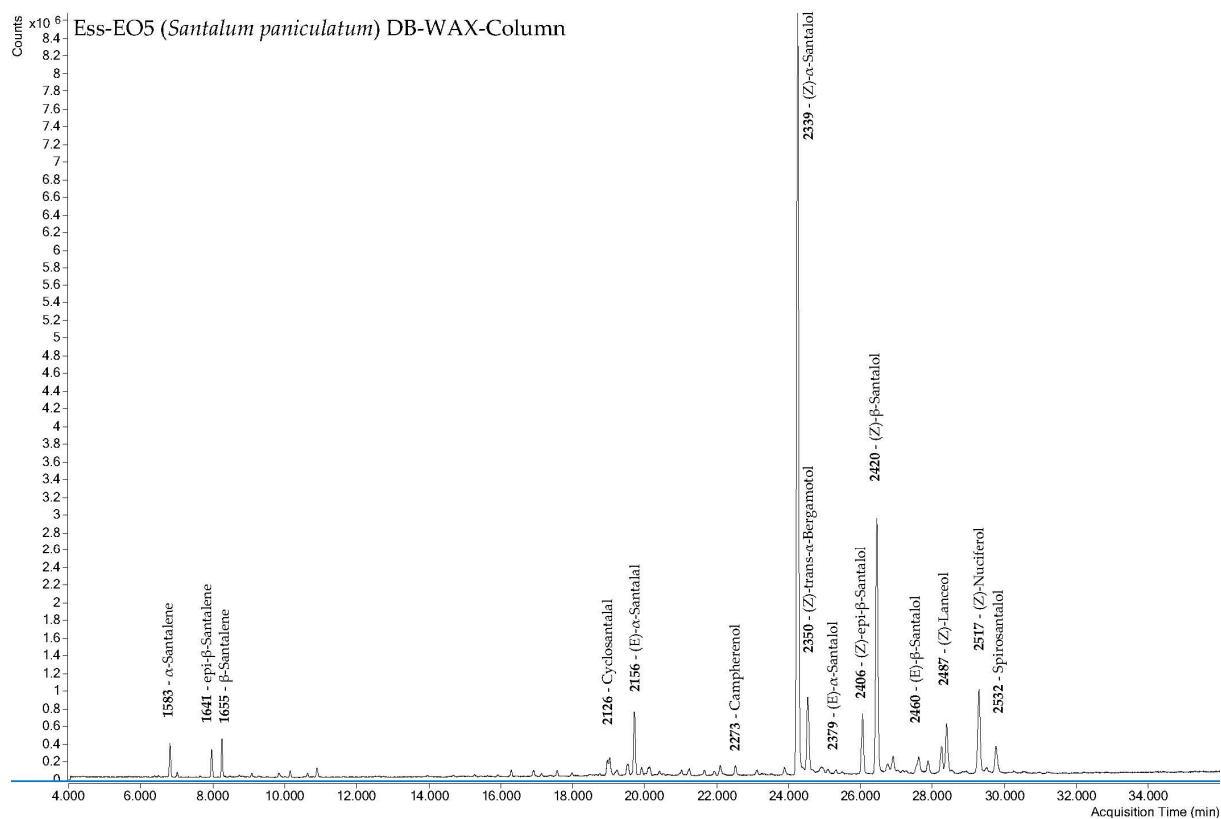

**Figure S7.** GC-MS chromatograms of Ess-EO5 on DB-5 and DB-HeavyWAX-columns

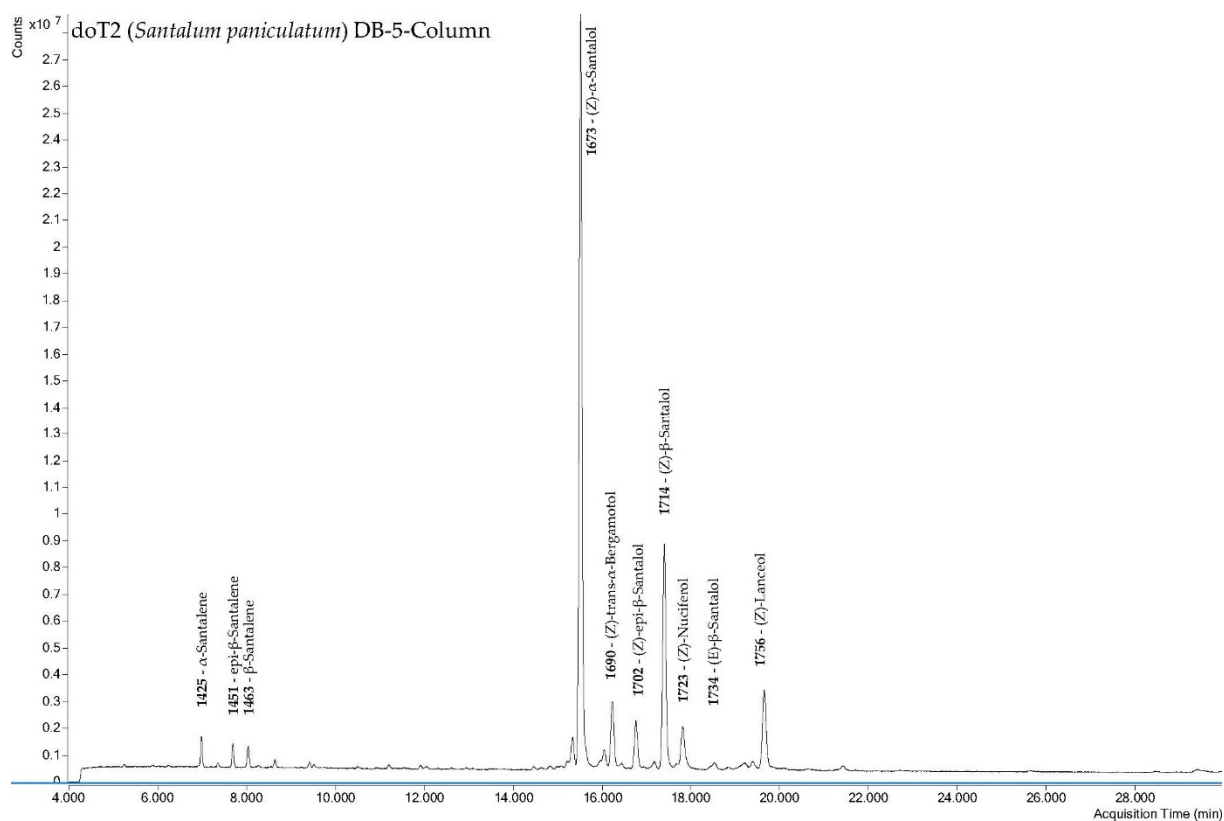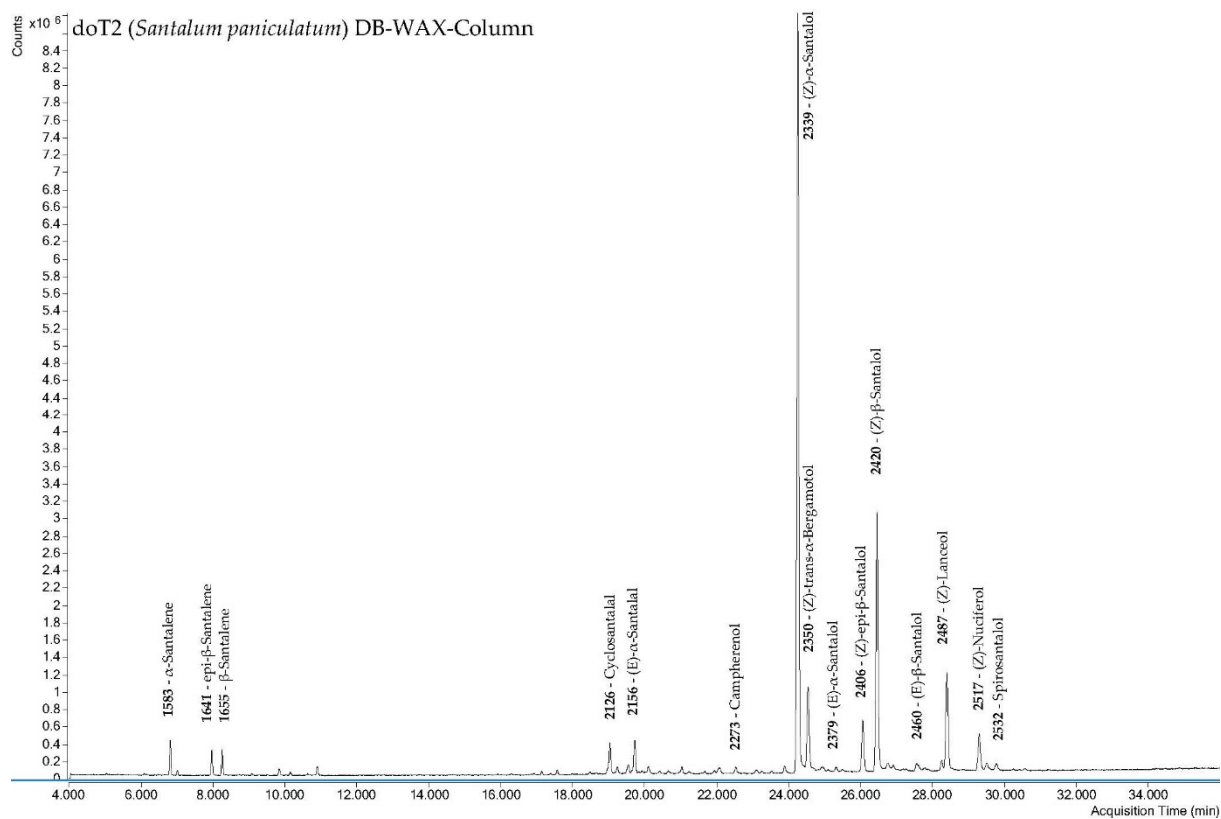

**Figure S8.** GC-MS chromatograms of doT2 on DB-5 and DB-HeavyWAX-columns

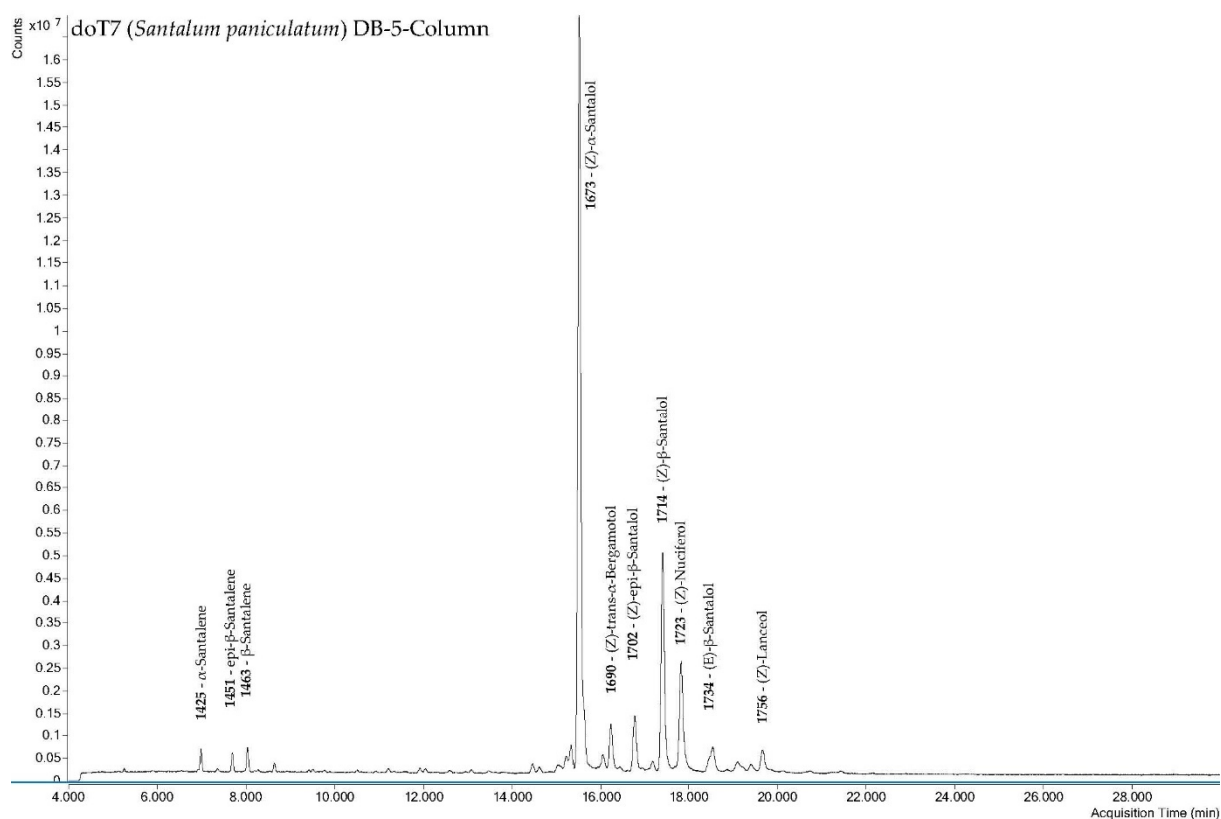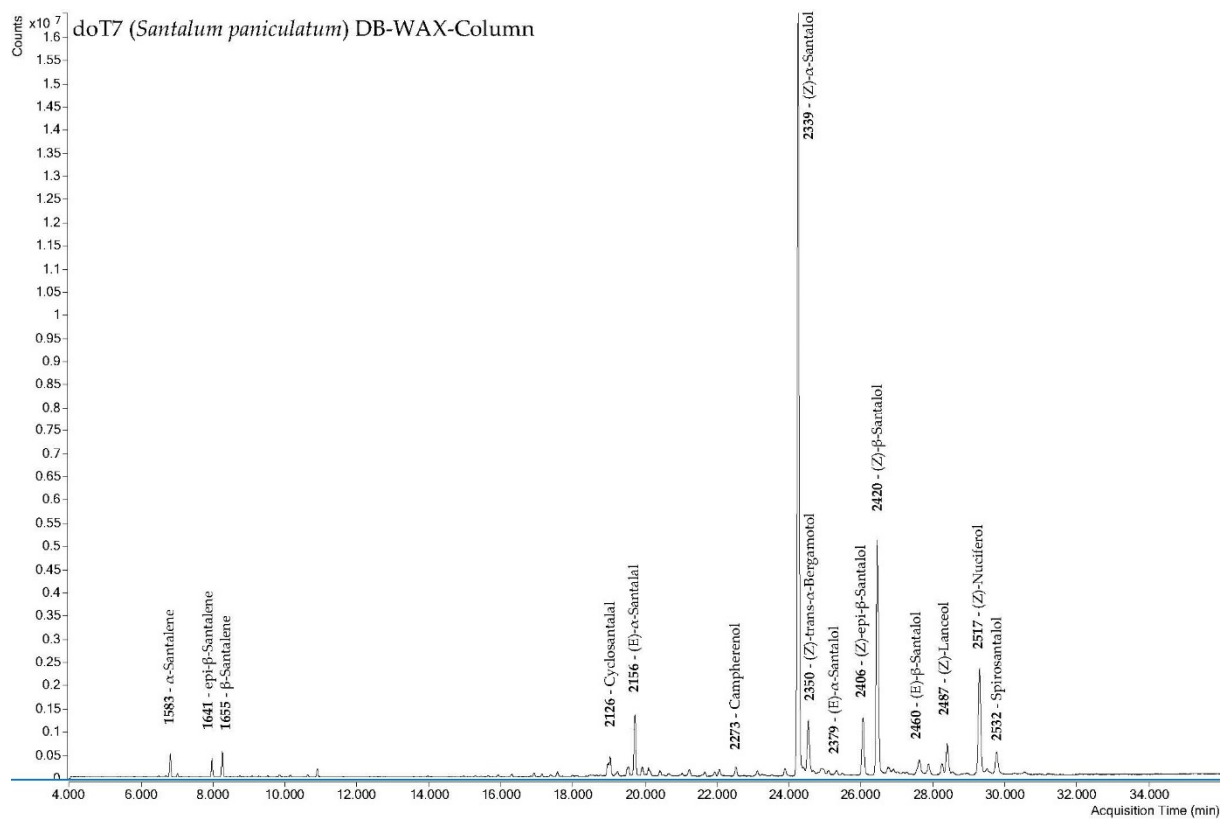

**Figure S9.** GC-MS chromatograms of doT7 on DB-5 and DB-HeavyWAX-columns



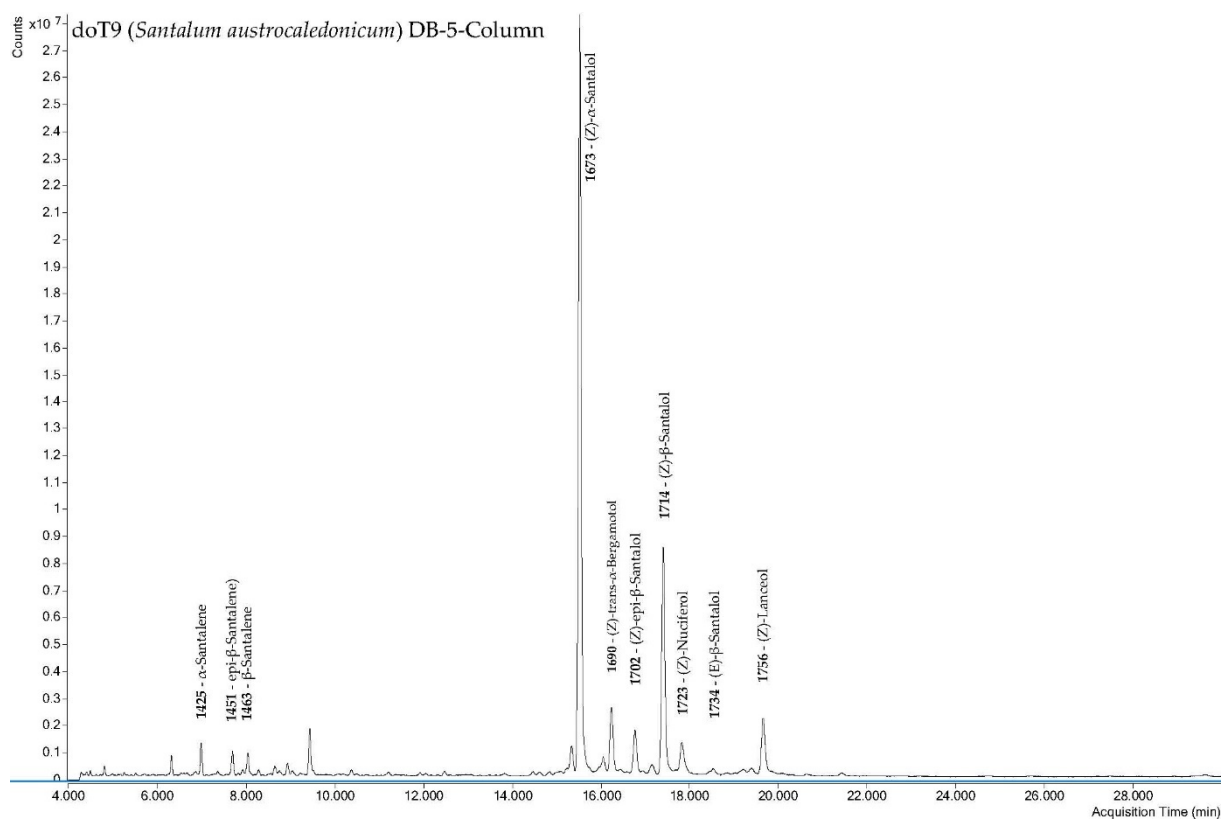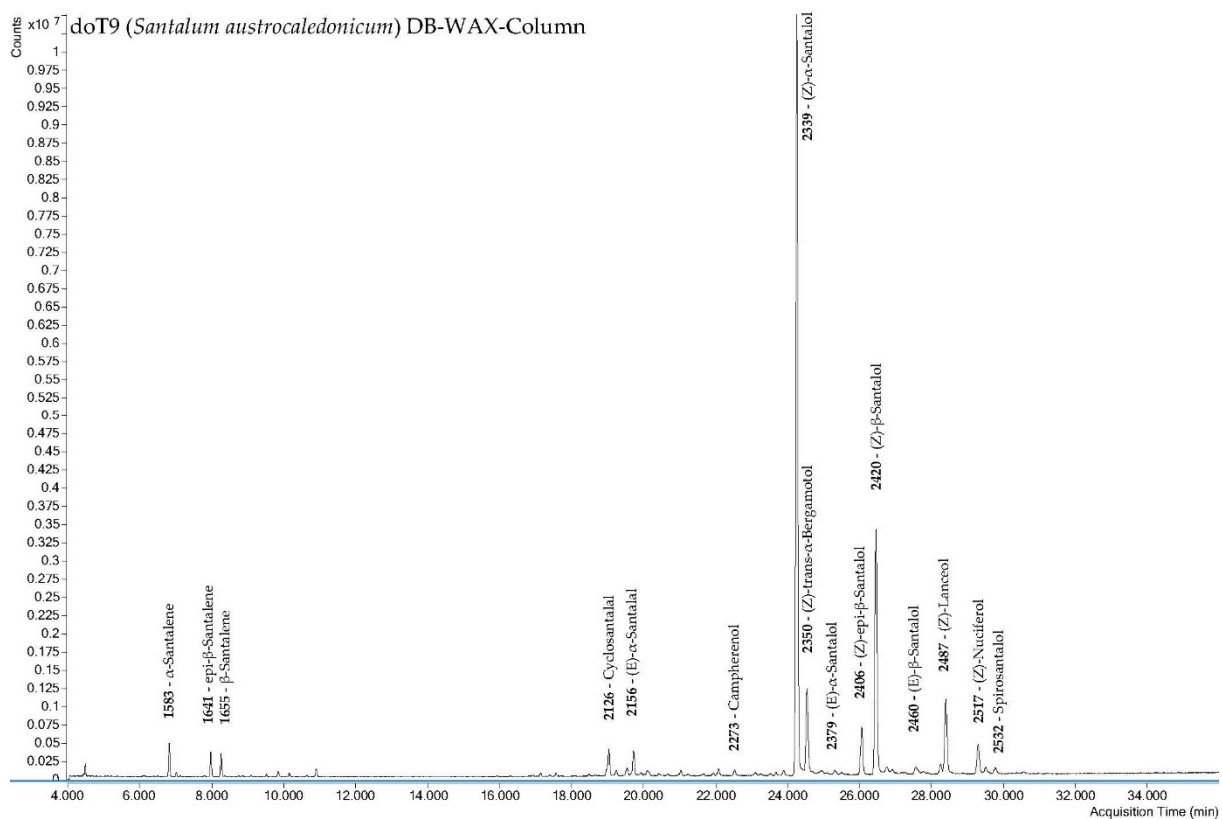

Figure S10. GC-MS chromatograms of doT9 on DB-5 and DB-HeavyWAX-columns

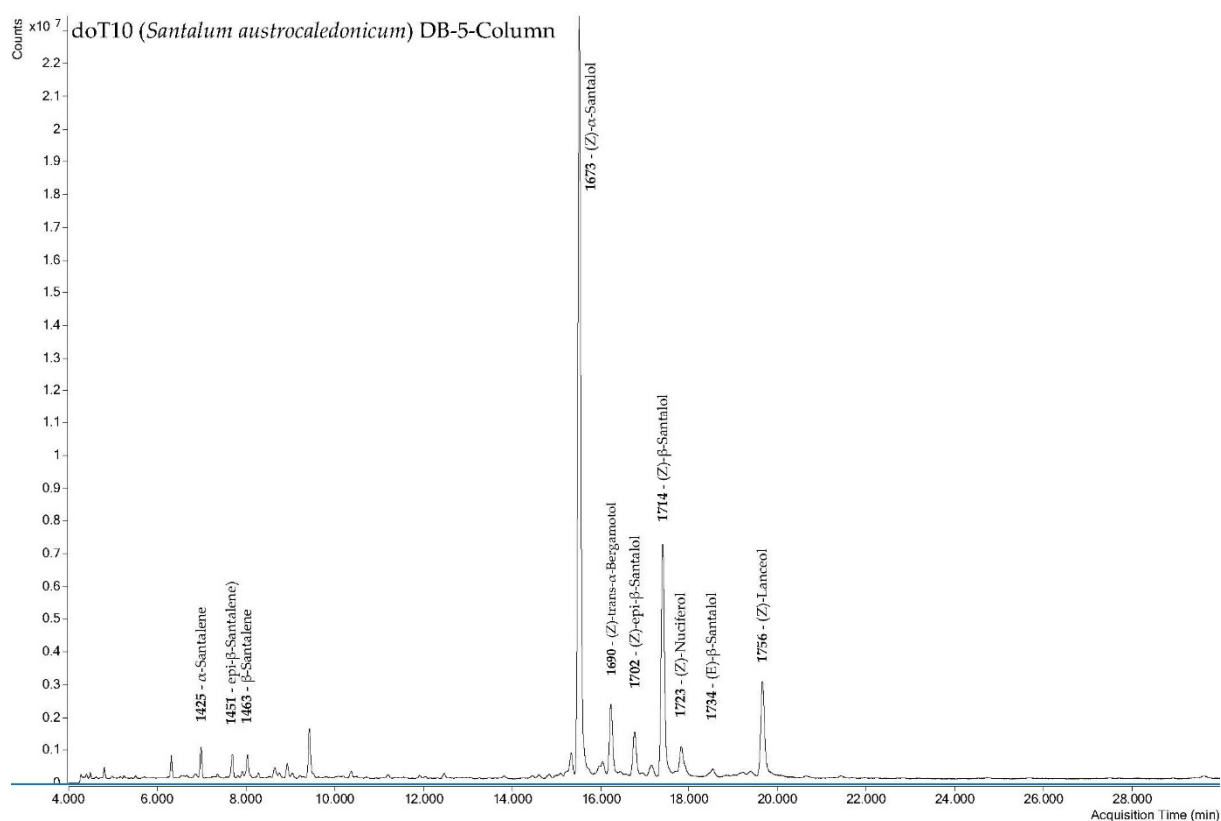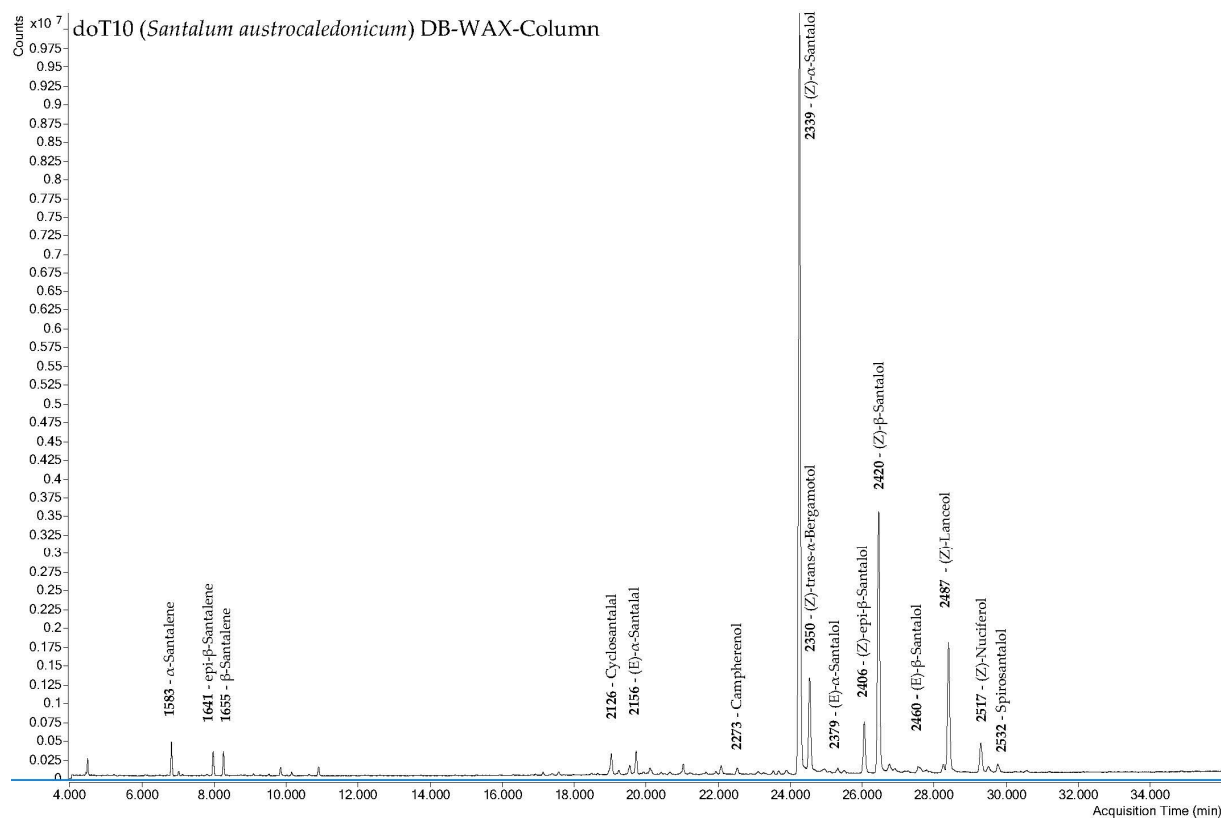

**Figure S11.** GC-MS chromatograms of doT10 on DB-5 and DB-HeavyWAX-columns

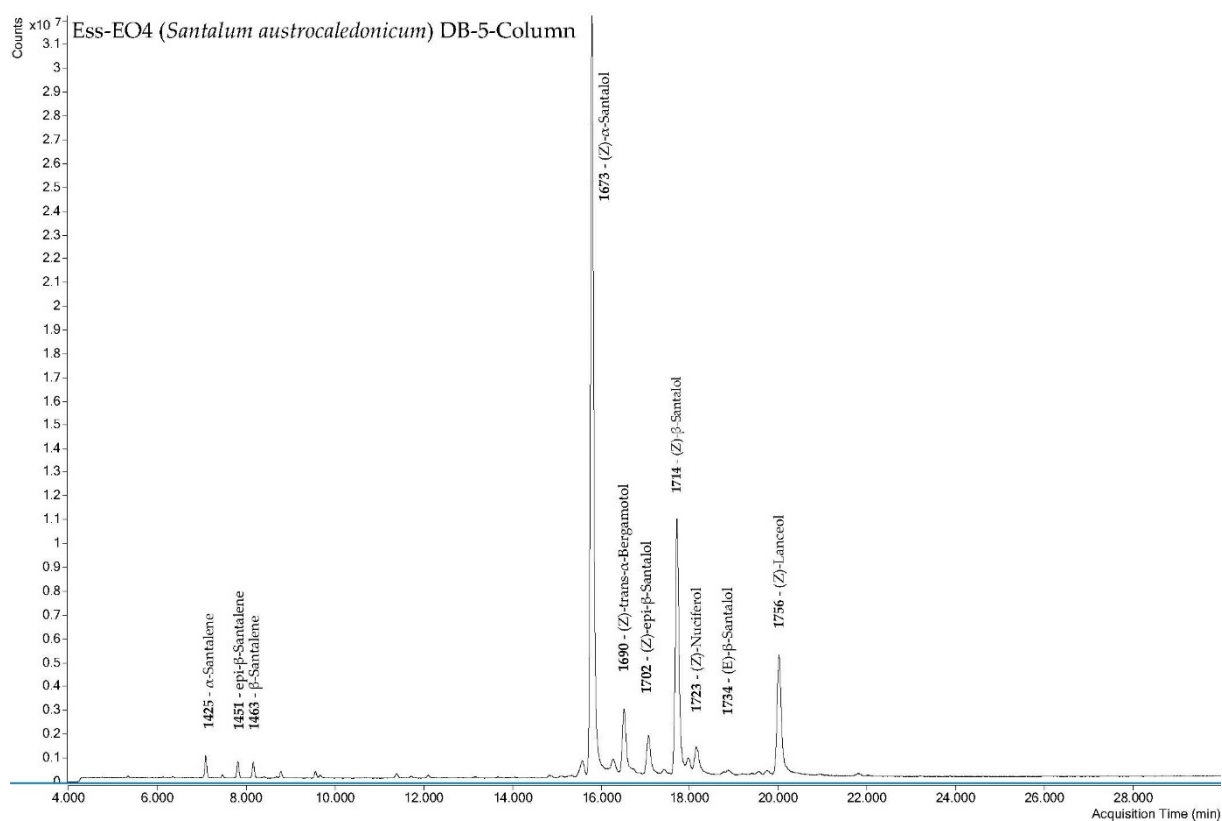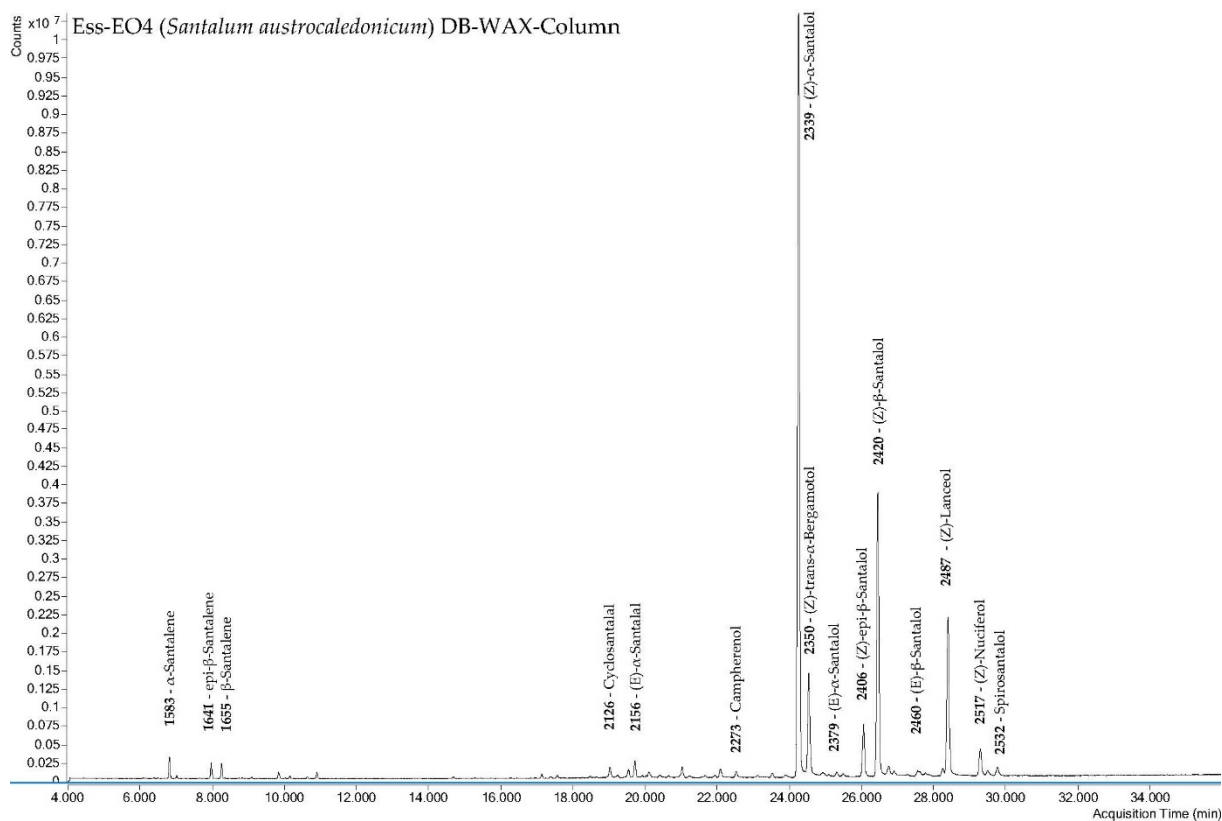

Figure S12. GC-MS chromatograms of Ess-EO4 on DB-5 and DB-HeavyWAX-columns

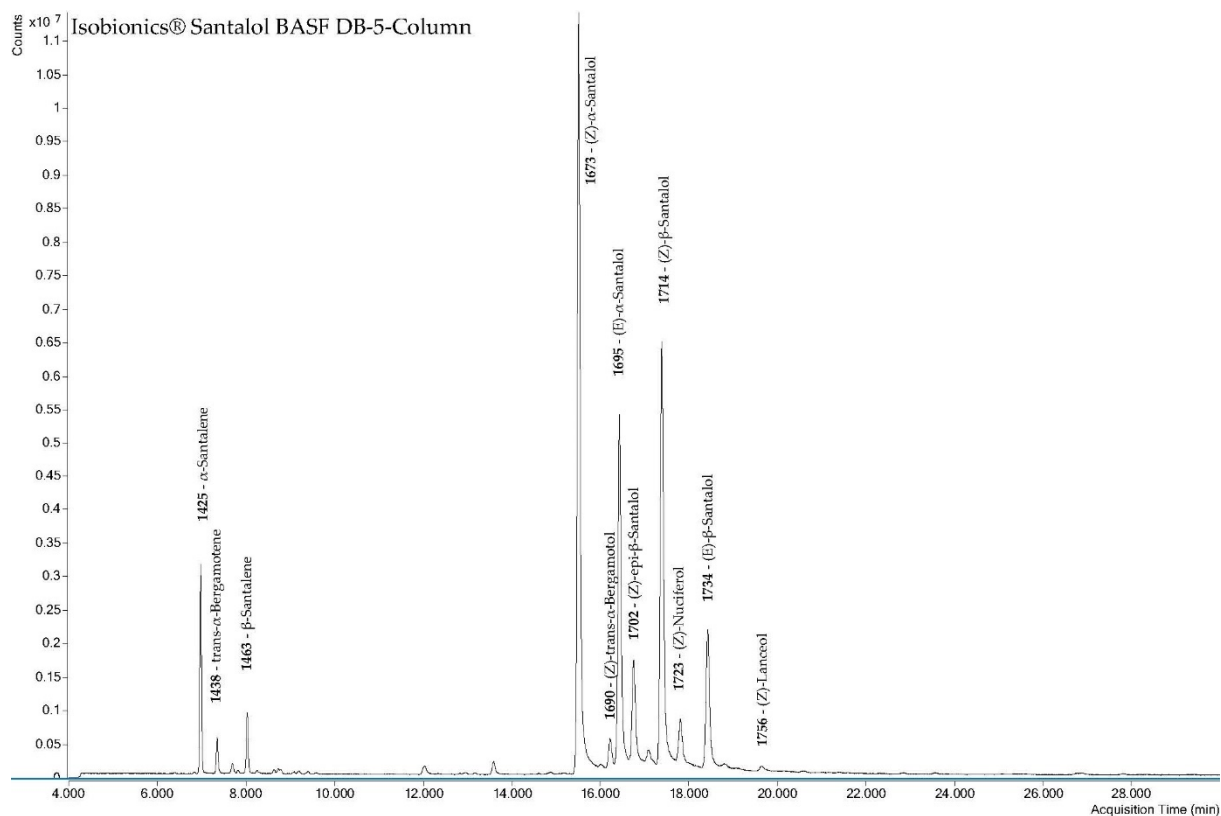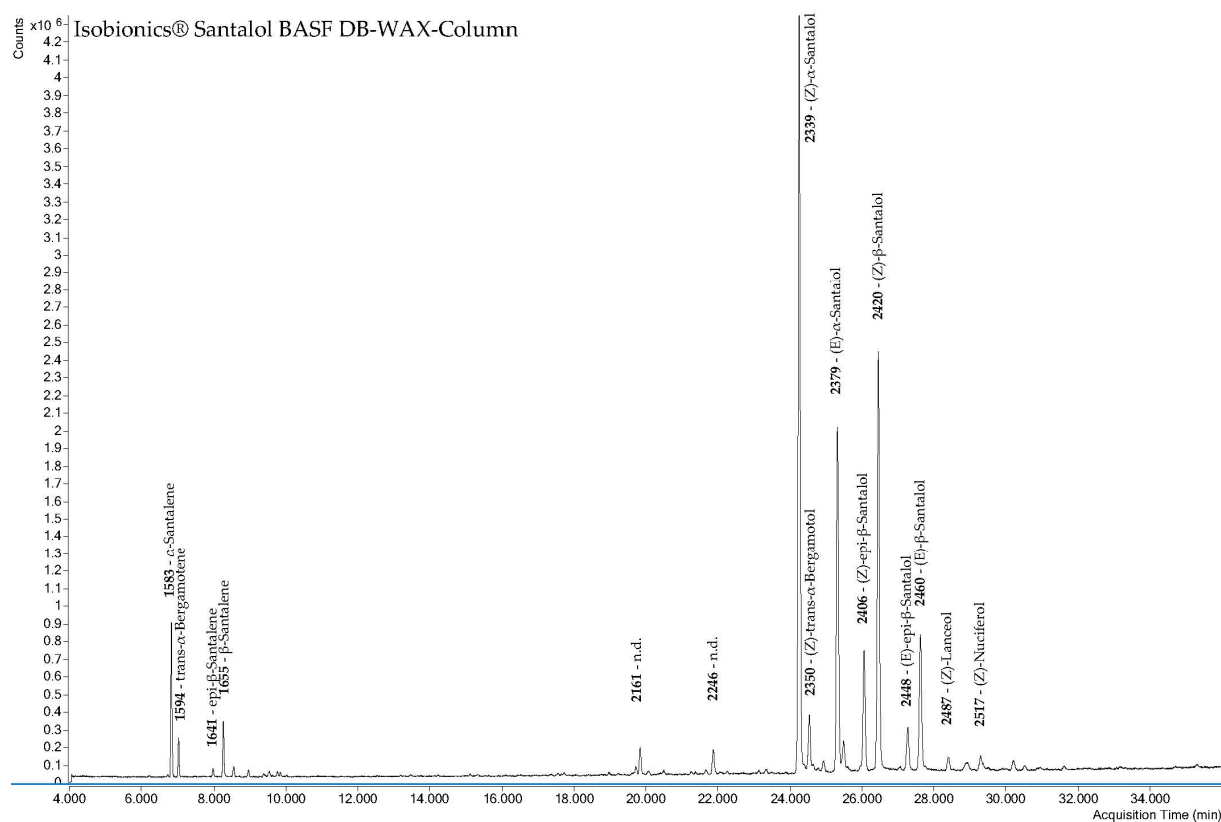

**Figure S13.** GC-MS Chromatograms of Isobionics® Santalol on DB-5 and DB-HeavyWAX-columns

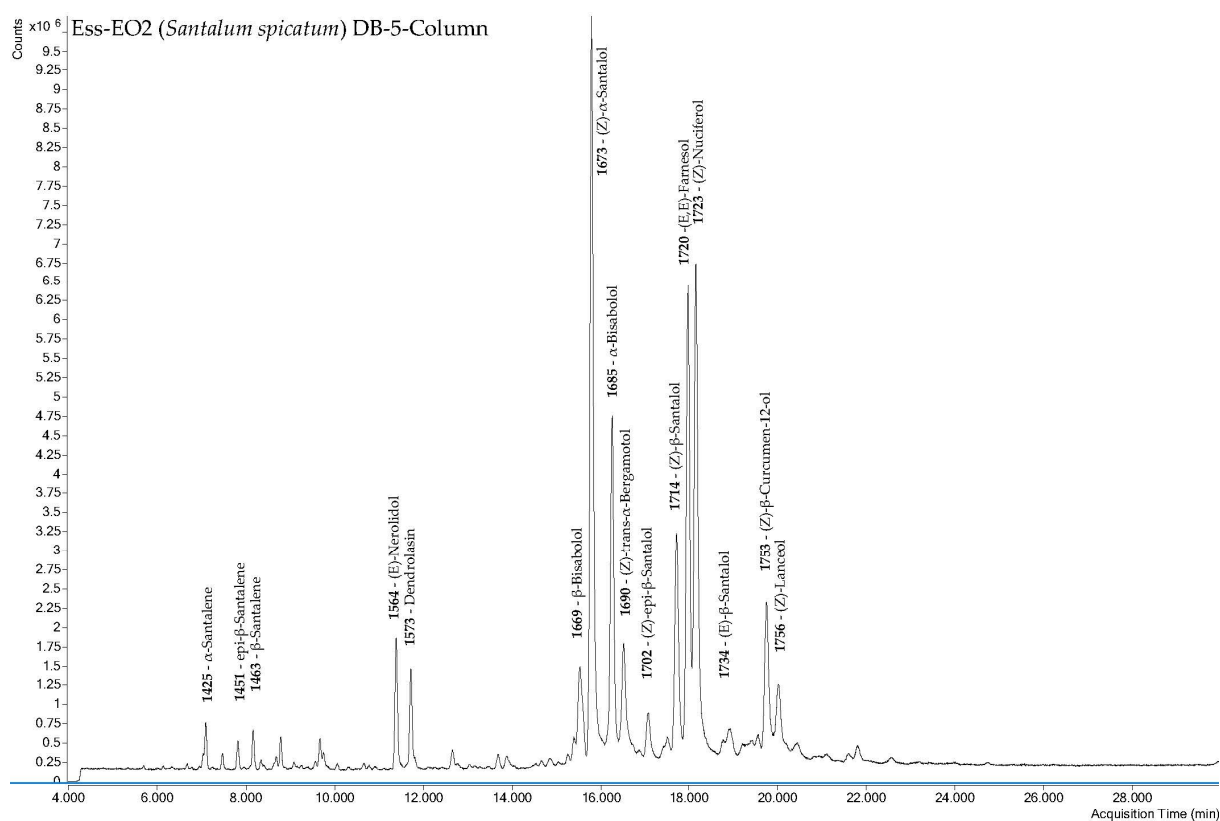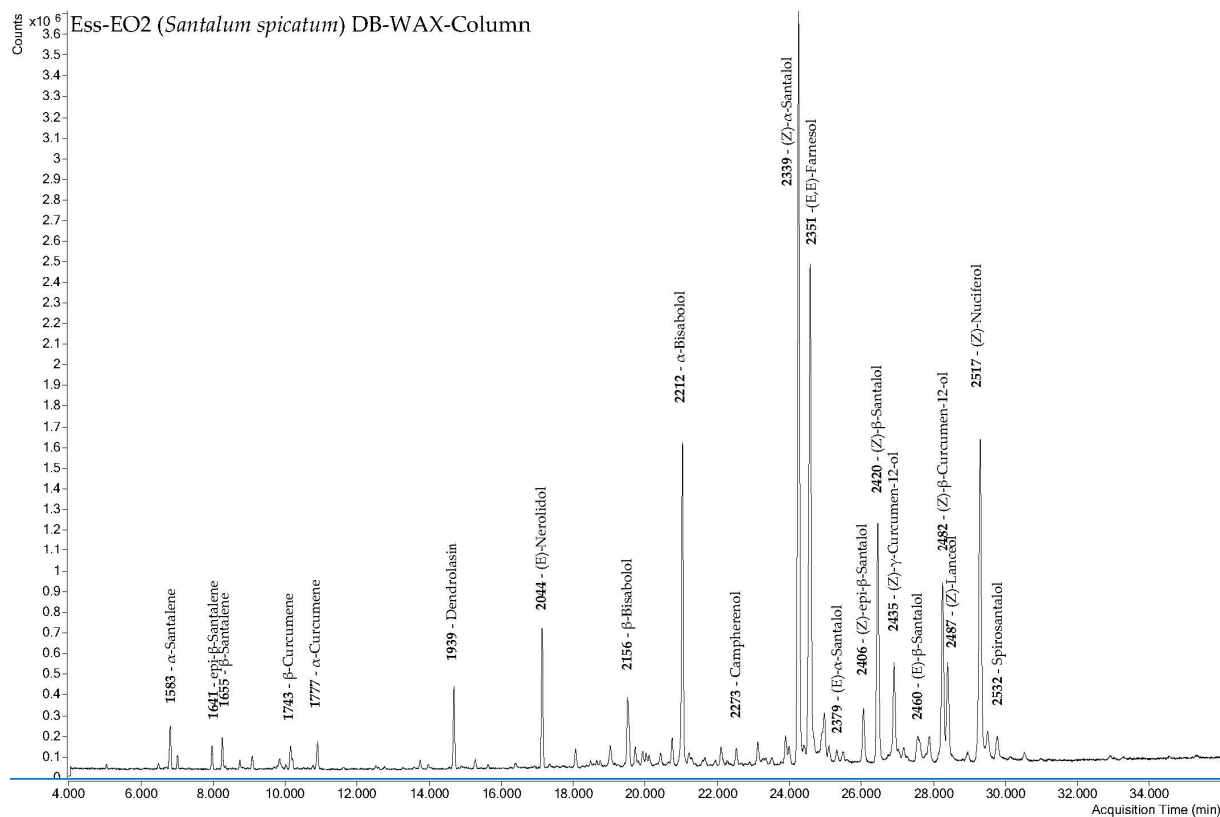

**Figure S14.** GC-MS chromatograms of Ess-EO2 on DB-5 and DB-HeavyWAX-columns

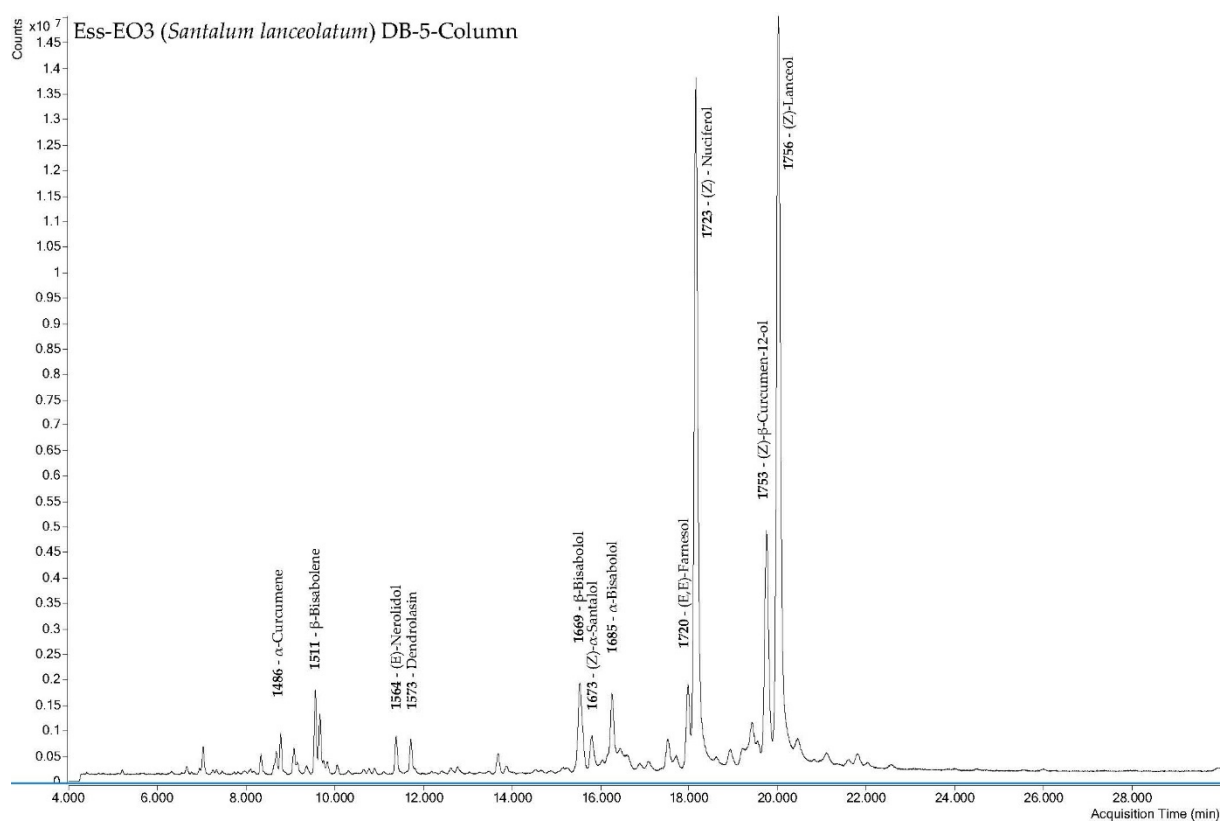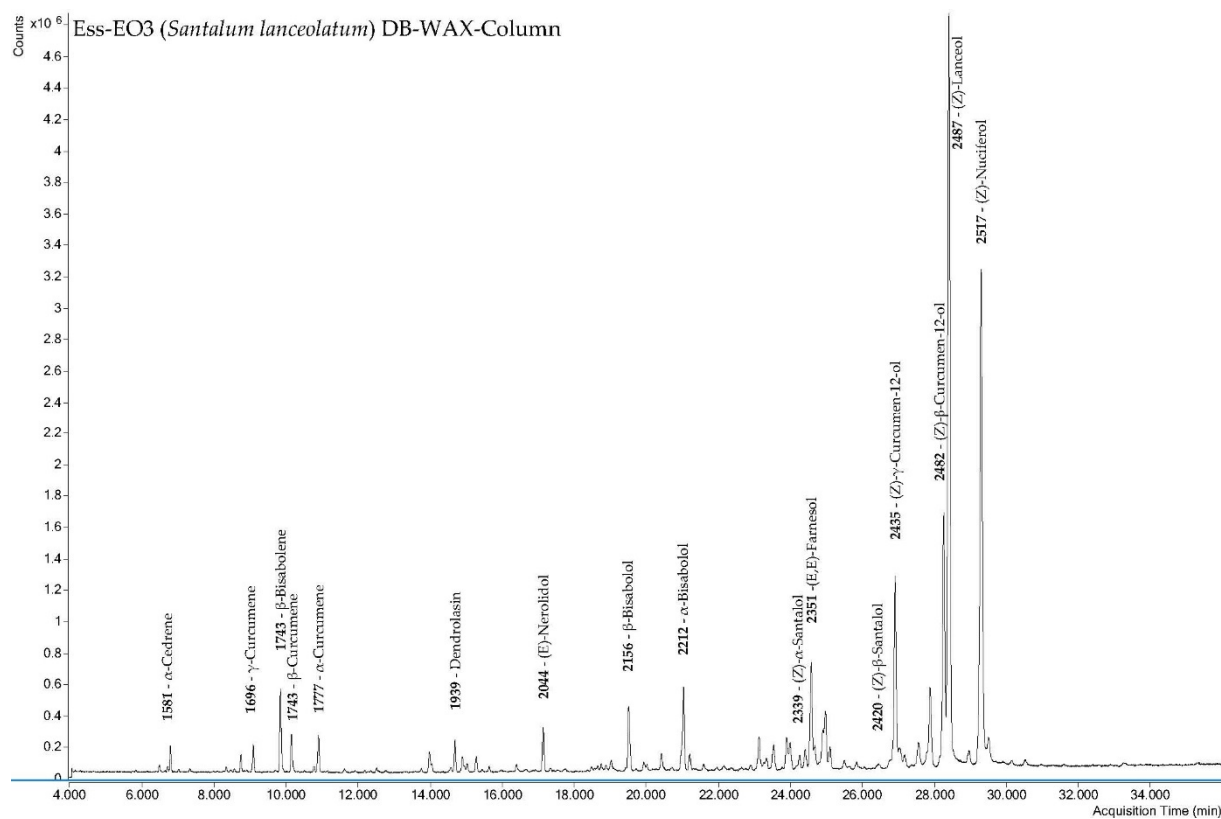

**Figure S15.** GC-MS chromatograms of Ess-EO3 on DB-5 and DB-HeavyWAX-columns

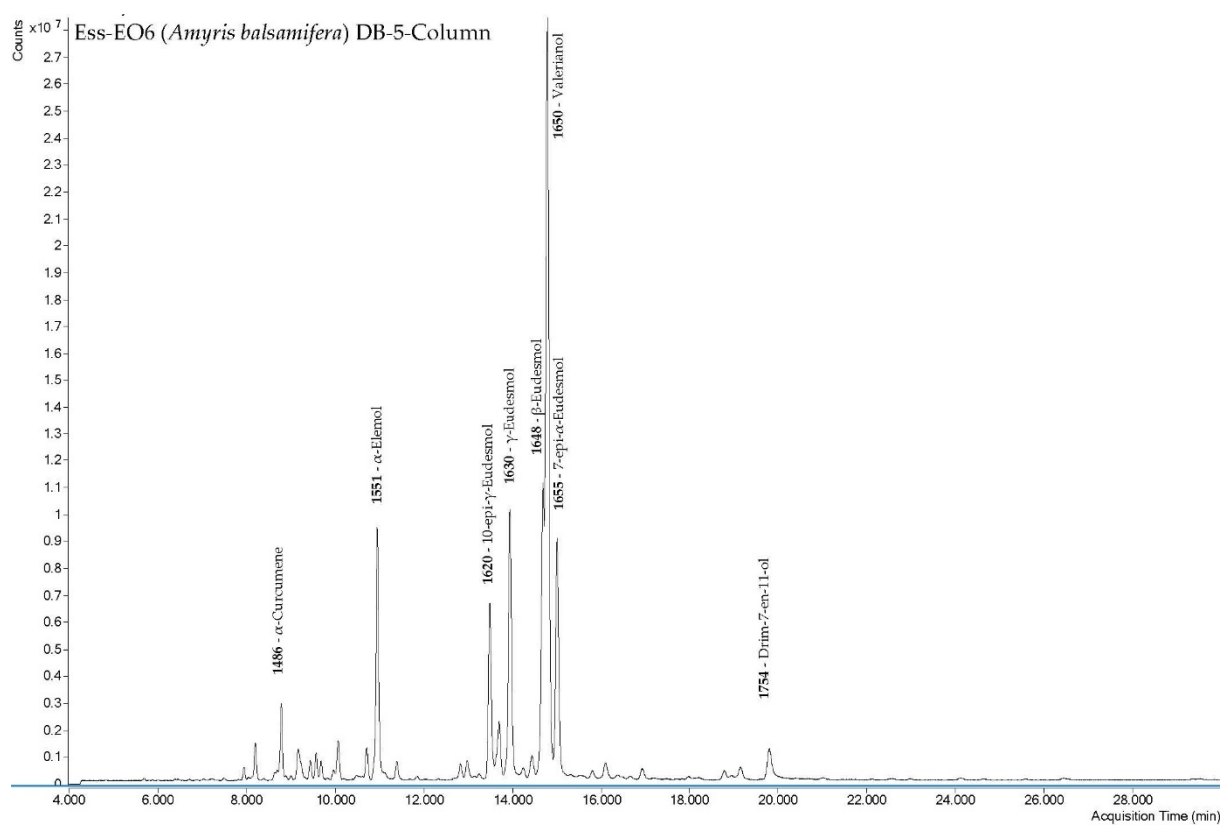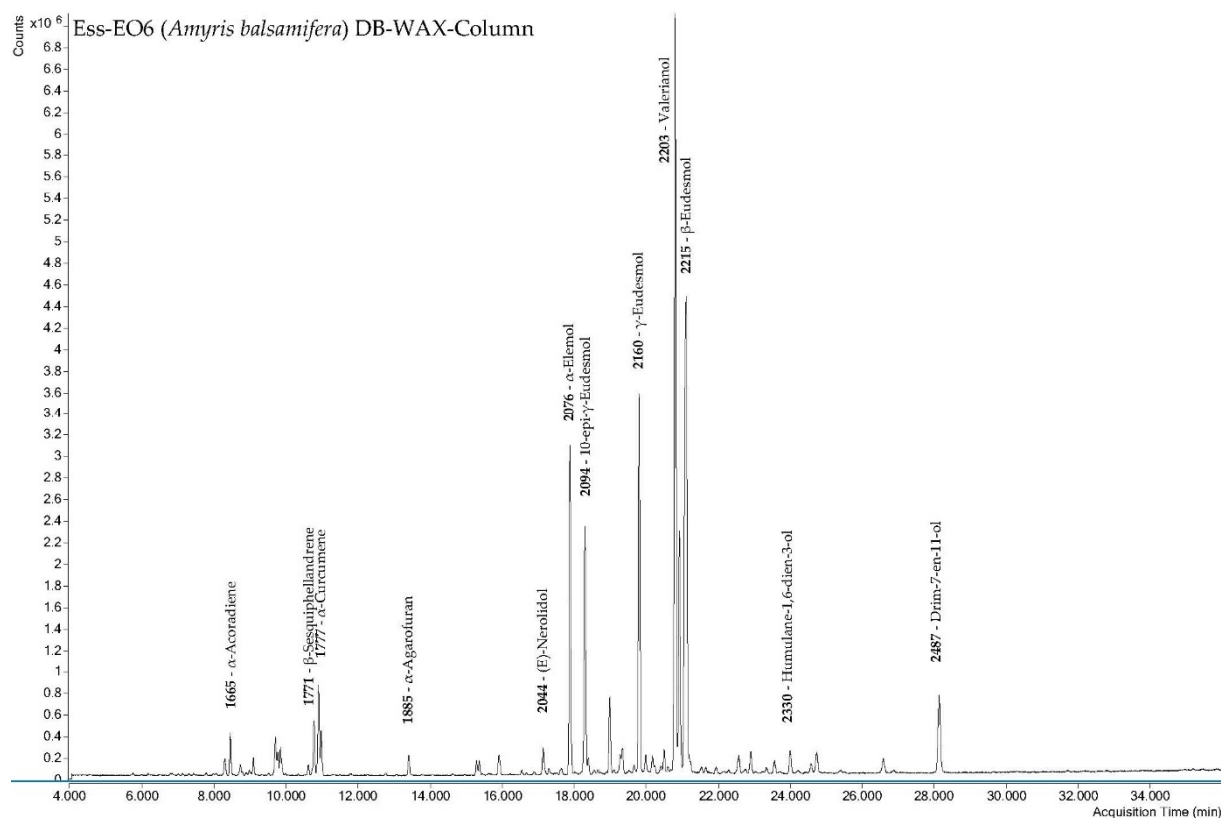

**Figure S16.** GC-MS chromatograms of Ess-EO6 on DB-5 and DB-HeavyWAX-columns

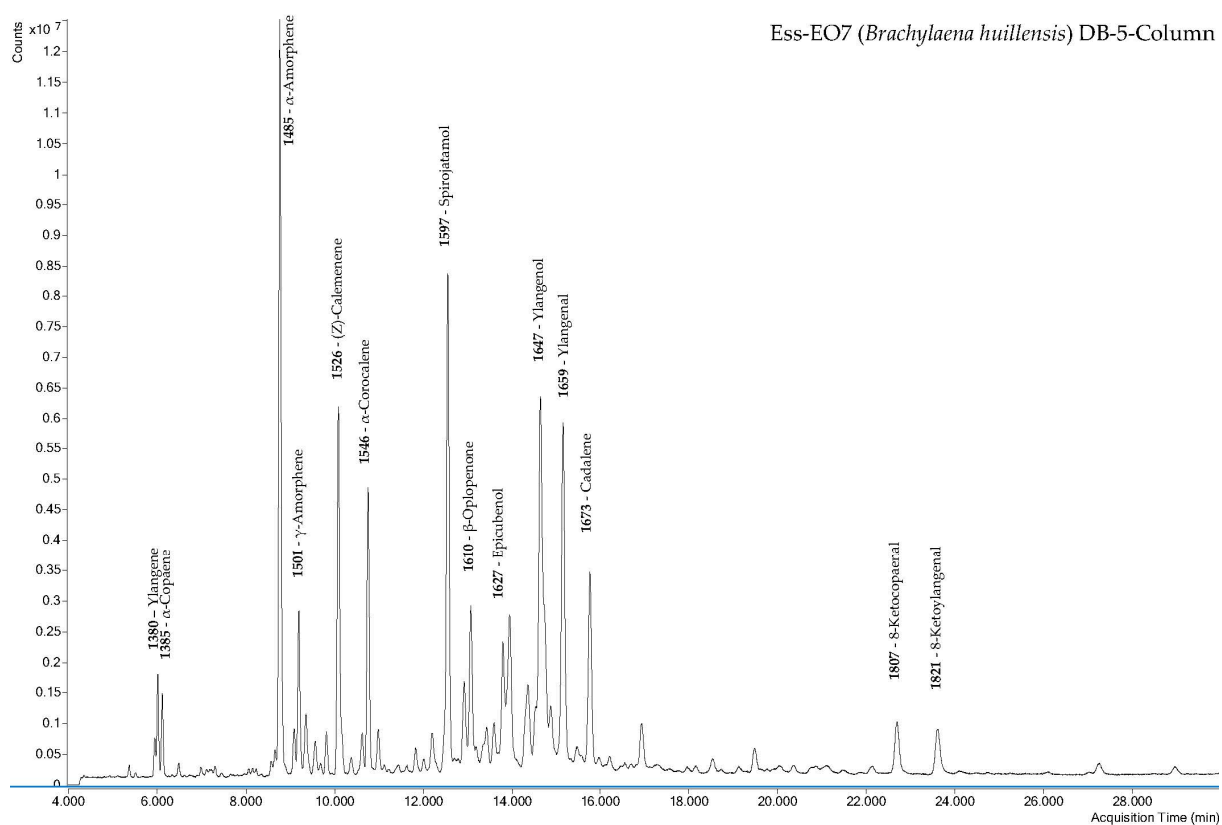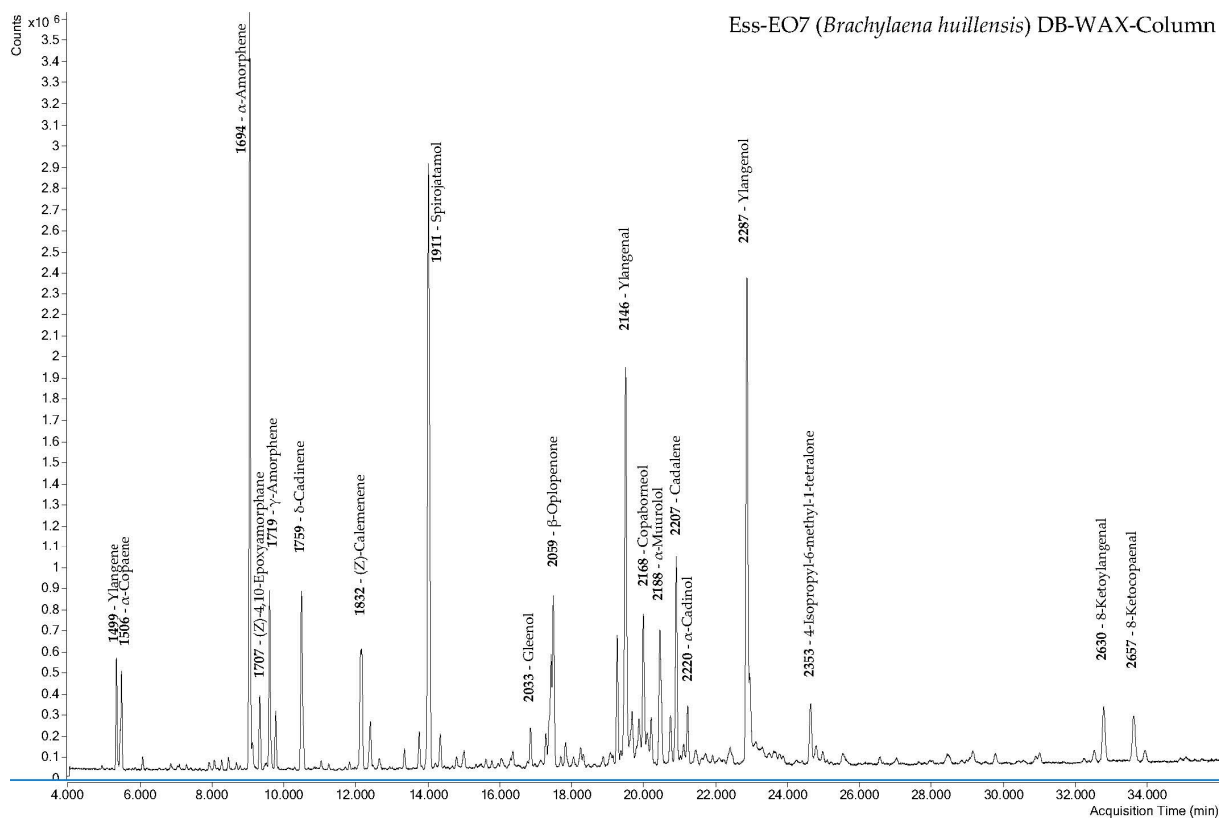

**Figure S17.** GC-MS chromatograms of Ess-EO7 on DB-5 and DB-HeavyWAX-columns



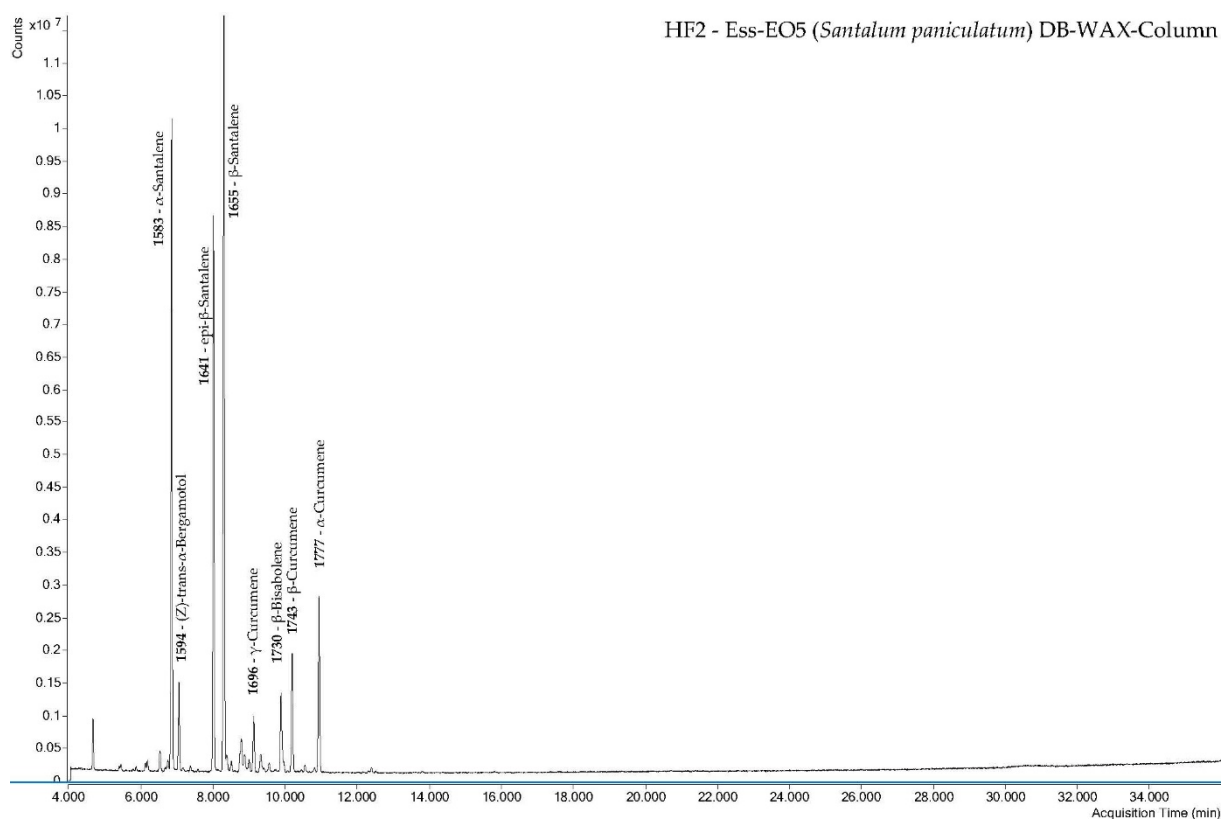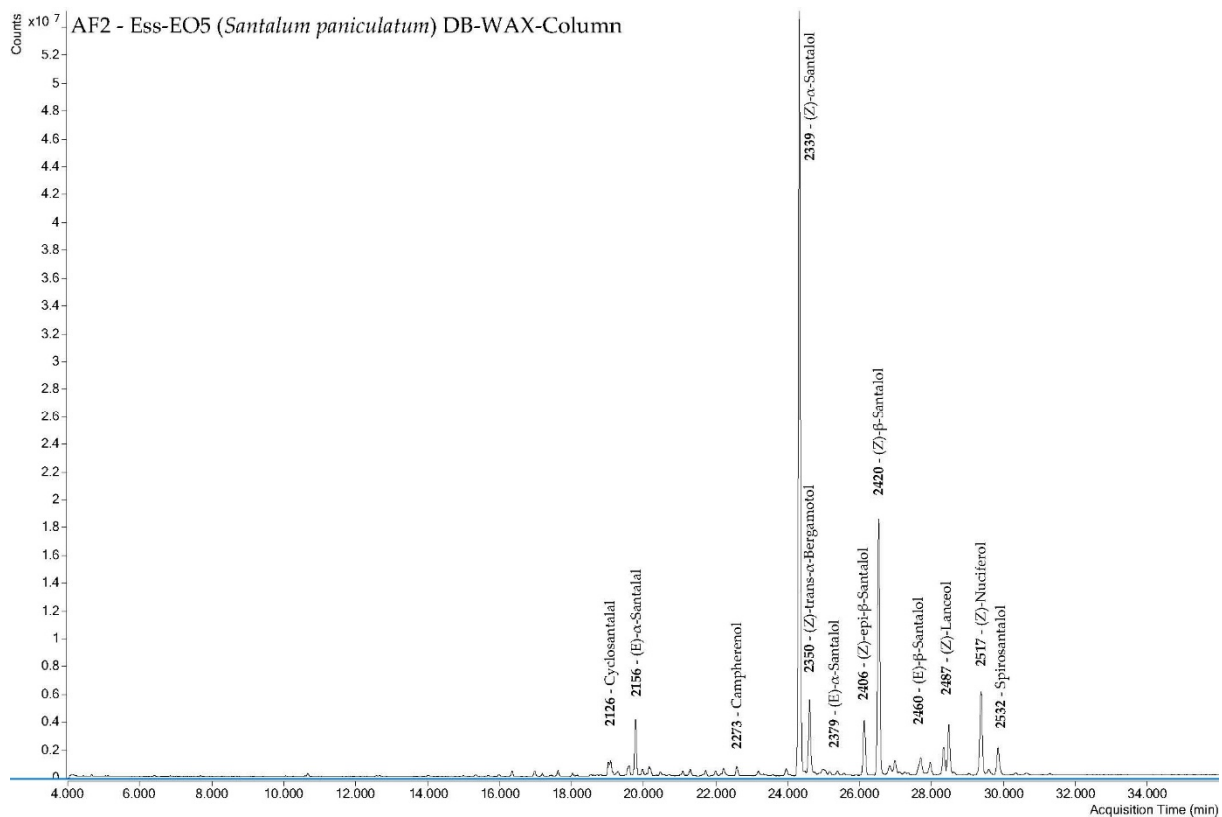

**Figure S18.** GC-MS chromatograms of hydrocarbon fraction (HF2) and alcohol fraction (AF2) on DB-HeavyWAX-column

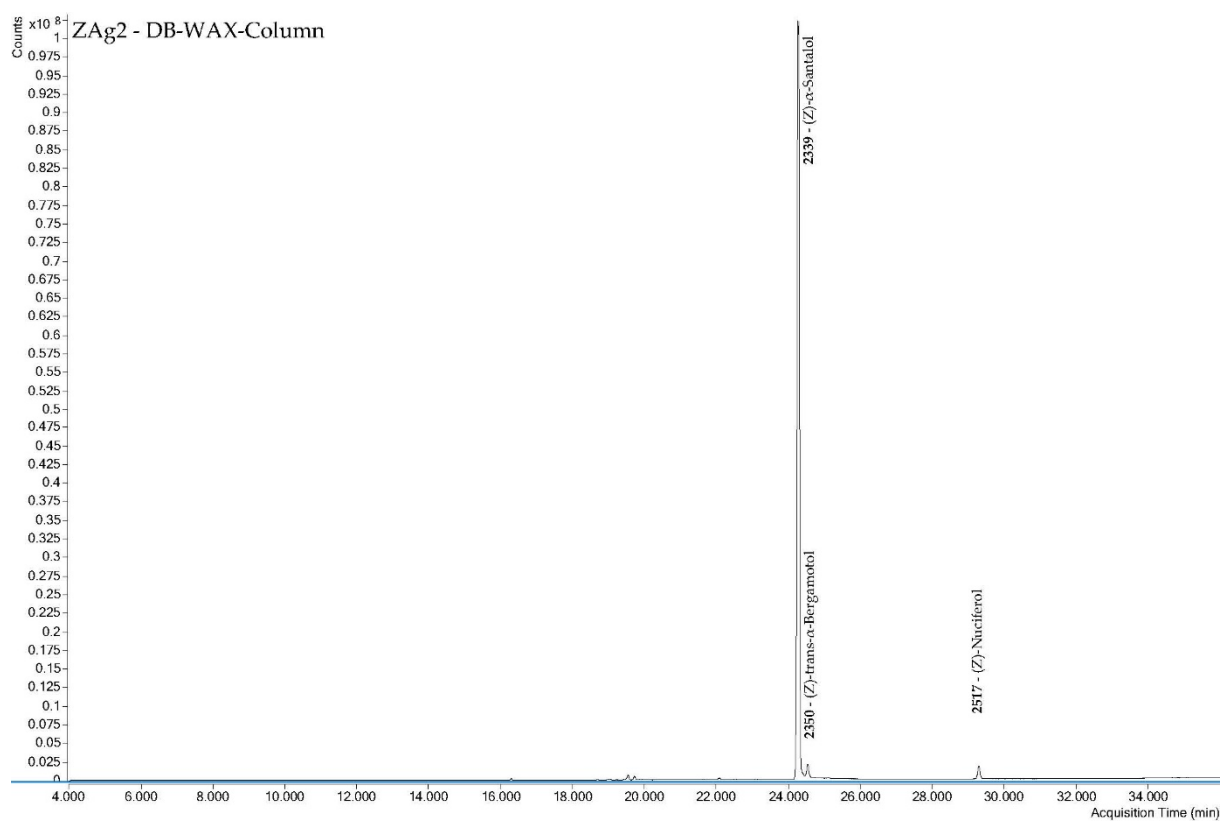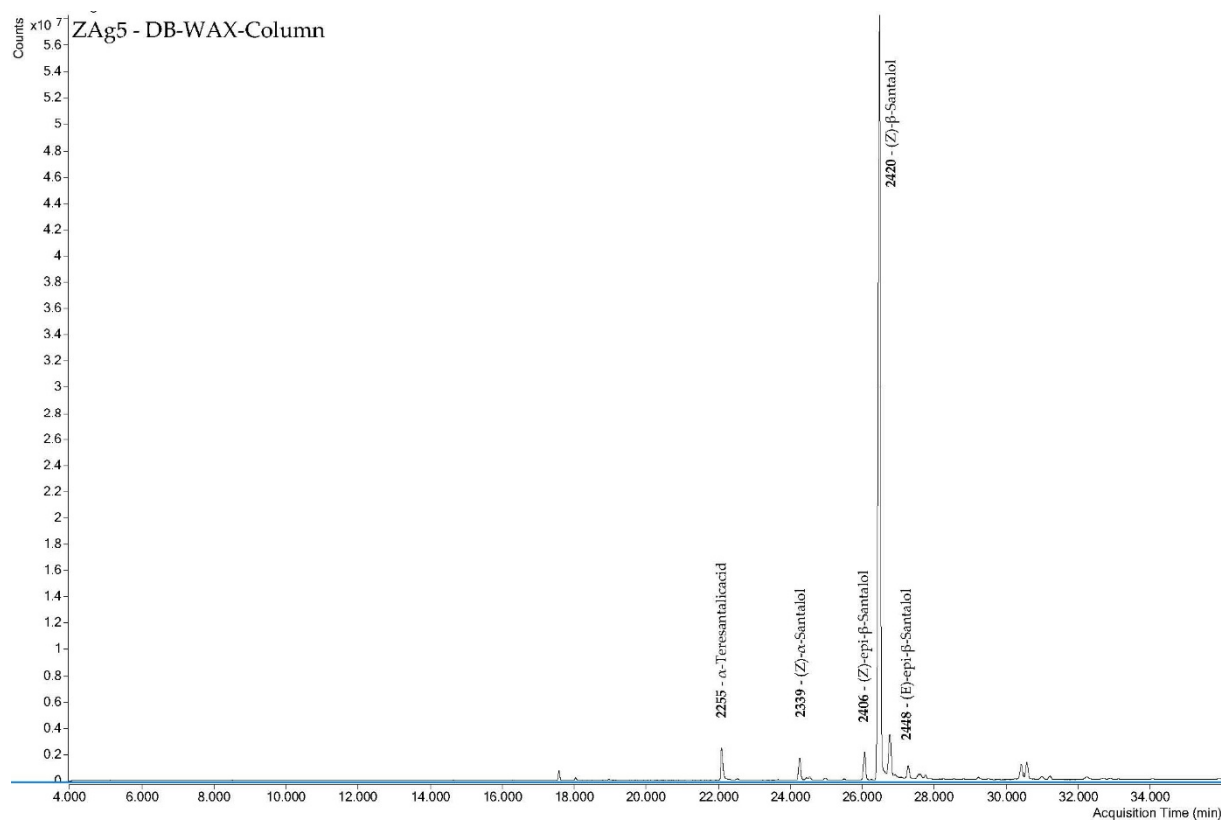

**Figure S19.** GC-MS chromatograms of (Z)- $\alpha$ -Santalol fraction (ZAg2, above) and (Z)- $\beta$ -Santalol fraction (ZAg5, below) on DB-HeavyWAX-column

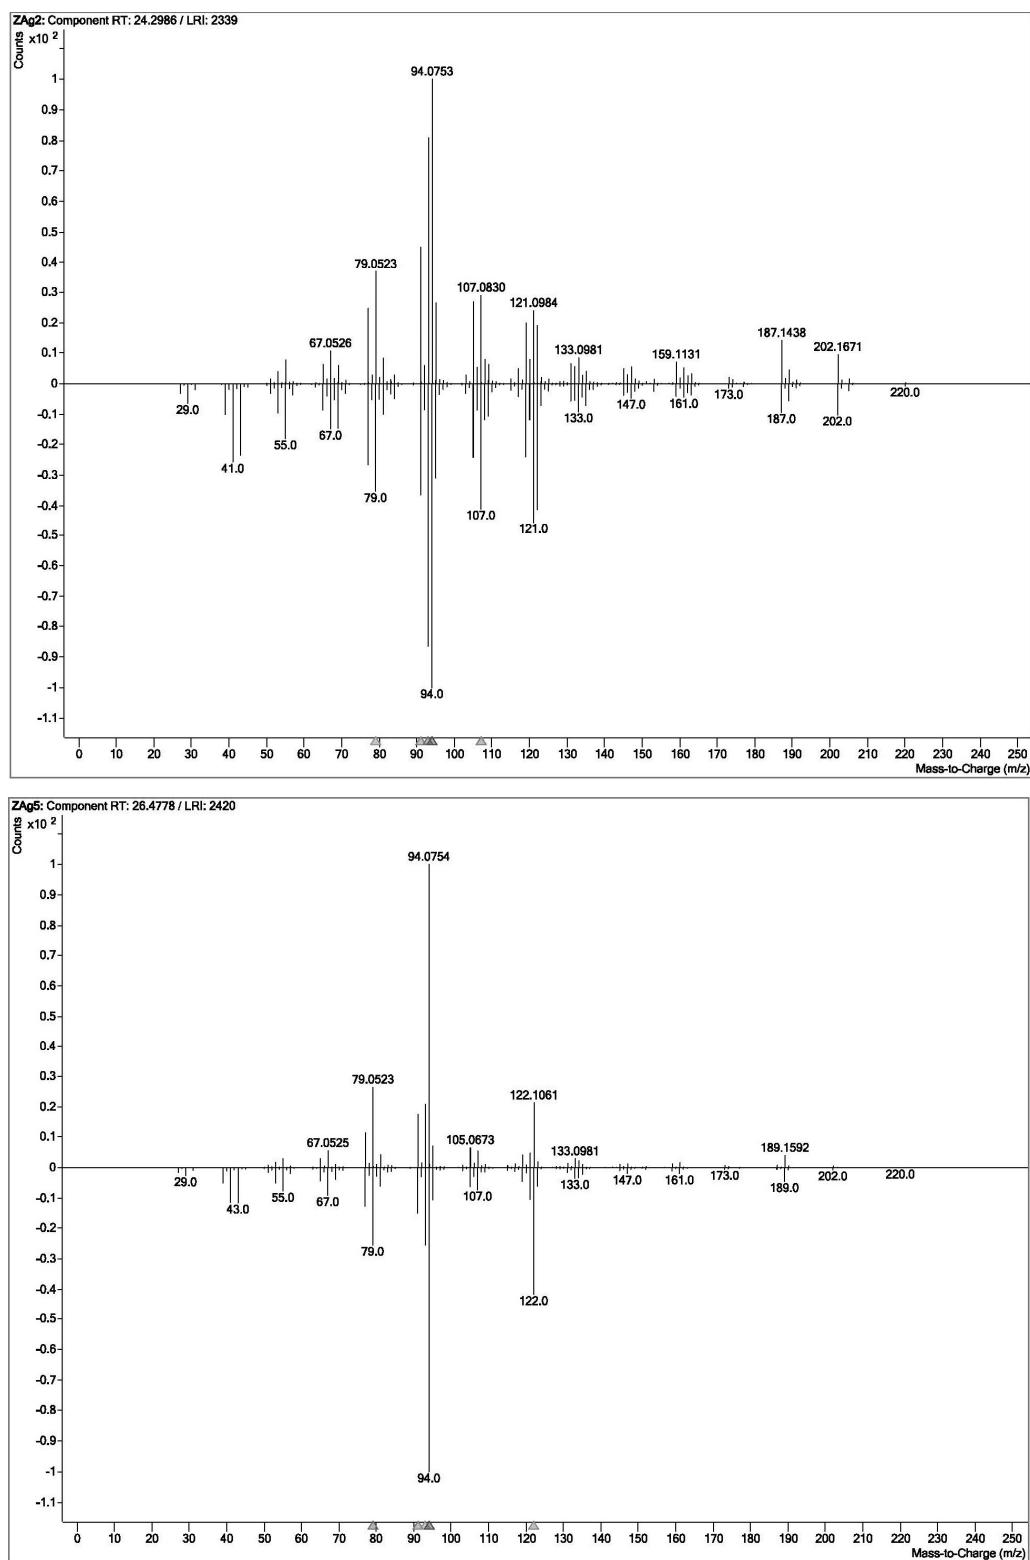

**Figure S20.** GC-QTOF Mass spectra of isolated (Z)- $\alpha$ -Santalol (fraction ZAg2, above) and (Z)- $\beta$ -Santalol (fraction ZAg5, below). Measured spectra are plotted upward in direct comparison with NIST library spectra, pointing downward.
